# Supplementary material for: Range-wide trends in tiger conservation landscapes, 2001 - 2020
Source: Frontiers journal article supplement (doi:10.3389/fcosc.2023.1191280), 2023-12-08
Supplement: Table_1.XLSX [file Table_1.XLSX]

## Sheet: Sheet1
Table S1. Contributors and/or Reviewers by name and institution
Name	Institution
Tempa Tshering	Bhutan Tiger Center
Minh Nguyen	Colorado State University
Deborah Martyr	Fauna and Flora International
Will Duckworth	Independent consultant
Yadvendradev Jhala	Independent consultant
Urs Breitenmoser	IUCN Cat Specialist Group
Christine Breitenmoser-Wursten	IUCN Cat Specialist Group
Sogoto Roy	IUCN Integrated Tiger Habitat Conservation Programme
Elisa Facchini	IUCN Integrated Tiger Habitat Conservation Programme
Dusit Ngoprasert	King Mongkut's University of Technology
Naruemon Tantipisauh	King Mongkut's University of Technology
Wulan Pusparini	Oxford University
Abishek Harihar	Panthera
John Goodrich	Panthera
Barny Long	ReWild
Saket Badola	TRAFFIC - Asia
Evan Greenspan	Wildlife Asia
Clara Montgomery	Wildlife Asia
Anthony Lynam	Wildlife Conservation Society
Peter Clyne	Wildlife Conservation Society
Elizabeth Bennett	Wildlife Conservation Society
Alom Zahangir	Wildlife Conservation Society - Bangladesh
Christopher Holmes	Wildlife Conservation Society - Central Asia
Aimin Wang	Wildlife Conservation Society - China
Ren Yi	Wildlife Conservation Society - China
Killi Rayar	Wildlife Conservation Society - India
Devcharan Jathanna	Wildlife Conservation Society - India
Vidya Arhreya	Wildlife Conservation Society - India
Imran Siddiqui	Wildlife Conservation Society - India
Santi Saypanya	Wildlife Conservation Society - Laos
Akchousanh Rasphone	Wildlife Conservation Society - Laos
Mark Rayan	Wildlife Conservation Society - Malaysia
Saw Htun	Wildlife Conservation Society - Myanmar
Alex Diment	Wildlife Conservation Society - Myanmar
Pyae Phyoe Kyaw	Wildlife Conservation Society - Myanmar
Katya Nicolaeva	Wildlife Conservation Society - Russia
Dale Miquelle	Wildlife Conservation Society - Russia
Colin Poole	Wildlife Conservation Society - South Asia
Martin Callow	Wildlife Conservation Society - Southeast Asia
Anak Pattanavibool	Wildlife Conservation Society - Thailand
Detrit Sittibal	Wildlife Conservation Society - Thailand
Rob Stenmetz	World Wildlife Fund
Dechen Dorji	World Wildlife Fund - Bhutan
Pranav Chanchani	World Wildlife Fund - India
Kanchan Thapa	World Wildlife Fund - Nepal
Thomas Gray	World Wildlife Fund - Tigers Alive
Stuart Chapman	World Wildlife Fund - Tigers Alive
