# Supplementary material for: Range-wide trends in tiger conservation landscapes, 2001 - 2020
Source: Frontiers journal article supplement (doi:10.3389/fcosc.2023.1191280), 2023-12-08
Supplement: Table_2.XLSX [file Table_2.XLSX]

## Sheet: Sheet1
Original_order	edits	Table S2. Sources of tiger observation data, 2001 - 2020
9		Adhikarimayum, A. S., & Gopi, G. V. (2018). First photographic record of tiger presence at higher elevations of the Mishmi Hills in the Eastern Himalayan Biodiversity Hotspot, Arunachal Pradesh, India. Journal of Threatened Taxa, 10(13), 12833–12836. https://doi.org/10.11609/jott.4381.10.13.12833-12836
1		Aditya, V., & Ganesh, T. (2017). Mammals of Papikonda Hills, northern Eastern Ghats, India. Journal of Threatened Taxa, 9(10), 10823–10830.
2		Ahmed, M. F. (2009). Ecological Monitoring of Tigers in Orang National Park, Assam, India. First Year (2008-2009) (Technical Report, Aaranyak, TRCI: 01/2009). http://www.indiaenvironmentportal.org.in/files/Aaranyak_Technical_Report_Orang_Tiger_Project.pdf
3		Ahmed, M. F., Borah, J., Das, C., Basumatary, A., Sarma, R. N., Gogoi, D. D., Buragohain, S. N., Vasu, N. K., Talukdar, B. K., & Jhala, Y. V. (2010). Monitoring tigers and prey animals of Kaziranga National Park, Assam. India.
256		Ahmed, M. F., Lahkar, B. P., & Lahkar, D. (2019). Transboundary Tiger Conservation in Indo-Bhutan Barnadi-Jomotshangkha Forest Complex. Aaranyak.
278		Ahmed, M. F., Lahkar, D., Das, A. K., & Dutta, K. (2019). Assisting Conservation and Protection of Tigers and Habitats in the Upper Brahmaputra Valleys of Assam and Arunachal Pradesh, India. Aaranyak.
257		Ahumada, J. A., Silva, C. E. F., Gajapersad, K., Hallam, C., Hurtado, J., Martin, E., McWilliam, A., Mugerwa, B., O’Brien, T., & Rovero, F. (2011). Community structure and diversity of tropical forest mammals: Data from a global camera trap network. Philosophical Transactions of the Royal Society B: Biological Sciences, 366(1578), 2703–2711.
4		Allen, M. L., Sibarani, M. C., Utoyo, L., & Krofel, M. (2020). Terrestrial mammal community richness and temporal overlap between tigers and other carnivores in Bukit Barisan Selatan National Park, Sumatra. Animal Biodiversity and Conservation, 97–107. https://doi.org/10.32800/abc.2020.43.0097
5		Andheria, A. P., Karanth, K. U., & Kumar, N. S. (2007). Diet and prey profiles of three sympatric large carnivores in Bandipur Tiger Reserve, India. Journal of Zoology, 273(2), 169–175. https://doi.org/10.1111/j.1469-7998.2007.00310.x
6		Anwar, M., & Borah, J. (2020). Functional status of a wildlife corridor with reference to tiger in Terai Arc Landscape of India. Tropical Ecology, 1–7.
7		Anwar, M., Kumar, H., & Vattakaver, J. (2010). Status of Tigers in Pilibhit Forest Division, Terai Arc Landscape, Uttar Pradesh, India. WWF-India.
258		Ariyanto, T., Dinata, Y., Dwiyanto, Sugito, W., Turyanto, E., Kirklin, S., & Amin, R. (2021). Status of Sumatran Tiger in the Berbak-Sembilang landscape (2020). Journal of Threatened Taxa, 13(6), 18419–18426. https://doi.org/10.11609/jott.6271.13.6.18419-18426
8		Ash, E., Hallam, C., Chanteap, P., Kaszta, Zaneta, Macdonald, D. W., Rojanachinda, W., Redford, T., & Harihar, A. (2020). Estimating the density of a globally important tiger (Panthera tigris) population: Using simulations to evaluate survey design in Eastern Thailand. Biological Conservation, 241, 108349.
259		Ash, E., Noochdumrong, A., Jaroensuk, B., Raksat, S., Kaszta, Z., Srinoppawan, K., Redford, T., Chanteap, P., Hallam, C., & Macdonald, D. (2020). Opportunity for Thailand’s forgotten tigers: Assessment of the Indochinese tiger Panthera tigris corbetti and its prey with camera-trap surveys. Oryx.
260		Athreya, V., Odden, M., Linnell, J. D. C., Krishnaswamy, J., & Karanth, U. (2013). Big cats in our backyards: Persistence of large carnivores in a human dominated landscape in India. PloS One, 8(3).
10		Aung, S. S., Shwe, N. M., Frechette, J., Grindley, M., & Connette, G. (2017). Surveys in southern Myanmar indicate global importance for tigers and biodiversity. Oryx, 51(1), 13–13. https://doi.org/10.1017/S0030605316001393
11		Azad, M. A. K., Hashem, M. A., & Hossain, M. M. (2005). Study of the Human Royal Bengal Tiger Interaction of in situ and ex situ in Bangladesh. Journal of Biological Sciences, 5(3), 250–252.
12		Aziz, M. A., Tollington, S., Barlow, A., Goodrich, J., Shamsuddoha, M., Islam, M. A., & Groombridge, J. J. (2017). Investigating patterns of tiger and prey poaching in the Bangladesh Sundarbans: Implications for improved management. Global Ecology and Conservation, 9, 70–81.
13		Aziz, Md. A., Kabir, M. J., Shamsuddoha, M., Ahsan, M. M., Sharma, S., Chakma, S., Jahisd, M., Chowdhury, M. M. R., & Rahman, S. M. (2019). Second phase Status of Tigers in Bangladesh Sundarban 2018 (p. 40). Department of Zoology, Jahangirnagar University; WildTeam, Bangladesh; Forest Department.
261		Azlan, J., & Sharma, D. (2003). Camera trapping the Indochinese tiger, Panthera tigris corbetti, in a secondary forest in Peninsular Malaysia. Raffles Bulletin of Zoology, 51(2), 421–427.
14		Bagchi, S., Goyal, S., & Sankar, K. (2003). Prey abundance and prey selection by tigers (Panthera tigris) in a semi-arid, dry deciduous forest in western India. Journal of Zoology, 260(3), 285–290. https://doi.org/10.1017/S0952836903003765
262		Baker, M., McShea, W., Howard, J., Bhumpakphan, N., & Sukmasuang, R. (2015). Survey for small felid species in Thailand reserves & evidence for competitive exclusion by larger felids (p. 20). Smithsonian Conservation Biology Institute & Faculty of Forestry, Kasetsart University.
15		Bali, A., Kumar, A., & Krishnaswamy, J. (2007). The mammalian communities in coffee plantations around a protected area in the Western Ghats, India. Biological Conservation, 139(1–2), 93–102. https://doi.org/10.1016/j.biocon.2007.06.017
16		Barlow, A. C. D., McDougal, C., Smith, J. L. D., Gurung, B., Bhatta, S. R., Kumal, S., Mahato, B., & Tamang, D. B. (2009). Temporal Variation in Tiger (Panthera tigris) Populations and Its Implications for Monitoring. Journal of Mammalogy, 90(2), 472–478. JSTOR.
264		Bashir, T., Bhattacharya, T., Poudyal, K., Roy, M., & Sambandam, S. (2014). Precarious status of the Endangered dhole Cuon alpinus in the high elevation Eastern Himalayan habitats of Khangchendzonga Biosphere Reserve, Sikkim, India. Oryx, 48, 125–132. https://doi.org/10.1017/S003060531200049X
263		Bashir, T., Bhattacharya, T., Poudyal, K., Sathyakumar, S., & Qureshi, Q. (2013). Estimating leopard cat Prionailurus bengalensis densities using photographic captures and recaptures. Wildlife Biology, 19(4), 462–472.
17		Bhattacharya, A., & Habib, B. (2016). Highest elevation record of tiger presence from India. Cat News, 64, 24.
18		Bhattarai, B. P., & Kindlmann, P. (2012). Interactions between Bengal tiger (Panthera tigris) and leopard (Panthera pardus): Implications for their conservation. Biodiversity and Conservation, 21(8), 2075–2094. https://doi.org/10.1007/s10531-012-0298-y
19		Bisht, S., Banerjee, S., Qureshi, Q., & Jhala, Y. (2019). Demography of a high‐density tiger population and its implications for tiger recovery. Journal of Applied Ecology, 56(7), 1725–1740. https://doi.org/10.1111/1365-2664.13410
20		Bista, D., Lama, S. T., Shrestha, J., Rumba, Y. B., Weerman, J., Thapa, M., Acharya, H., Sherpa, A. P., Hudson, N. J., Baxter, G. S., & Murray, P. J. (2021). First record of Bengal Tiger, Panthera tigris tigris Linnaeus, 1758 (Felidae), in eastern Nepal. Check List, 17(5), 1249–1253. https://doi.org/10.15560/17.5.1249
21		Biswas, S., Bhatt, S., Sarkar, D., Talukdar, G., Pandav, B., & Mondol, S. (2020). Assessing tiger corridor functionality with landscape genetics and modelling across Terai-Arc Landscape, India [Preprint]. Ecology. https://doi.org/10.1101/2020.10.24.353789
22		Borah, J., Ahmed, M. F., & Sarma, P. K. (2010). Brahmaputra River islands as potential corridors for dispersing tigers: A case study from Assam, India. International Journal of Biodiversity and Conservation, 2(11), 350–358.
25		Borah, J., Jena, J., Yumnam, B., & Puia, L. (2016). Carnivores in corridors: Estimating tiger occupancy in Kanha-Pench corridor, Madhya Pradesh, India. Regional Environmental Change, 16(1), 43–52. https://doi.org/10.1007/s10113-015-0904-0
24		Borah, J., Wangchuk, D., & Swargowari, A. (2013). Tigers in the transboundary Manas conservation complex: Conservation implications across borders. Parks, 19, 51.
23		Borah, J., Wangchuk, D., Swargowari, A., Wangchuk, T., Sharma, T., Das, D., Rabha, N., Basumatari, A., Kakati, N., Ahmed, M. F., & 16 other authors. (2012). Tigers across Borders: Tigers in the Indo-Bhutan Transboundary Manas Conservation Complex (TMCC). Tempa T., Wangdi Y., Nedup T., Wangdi T., Tharchen L., Dhendup P., Bhobora CR, Pandav B. and Vattakaven J.
26		Borthakur, U., Barman, R. D., Das, C., Basumatary, A., Talukdar, A., Ahmed, M. F., Talukdar, B. K., & Bharali, R. (2011). Noninvasive genetic monitoring of tiger (Panthera tigris tigris) population of Orang National Park in the Brahmaputra floodplain, Assam, India. EUROPEAN JOURNAL OF WILDLIFE RESEARCH, 57(3), 603–613. https://doi.org/10.1007/s10344-010-0471-0
27		Borthakur, U., Saini, R. P., Gupta, S. S., Jakher, R., Das, C., Das, A. K., Sarma, P. K., Talukdar, B. K., & Bharali, R. (2013). Noninvasive genetic assessment of population status of tigers (Panthera tigris tigris) in Buxa Tiger Reserve, West Bengal, India. International Journal of Biodiversity and Conservation, 6. https://doi.org/DOI: 10.5897/IJBC12.067
265		Buzzard, P. J., Li, X., & Bleisch, W. V. (2017). The status of snow leopards Panthera uncia, and high altitude use by common leopards P. pardus, in north-west Yunnan, China. Oryx, 51(4), 587–589. https://doi.org/10.1017/S0030605317000825
28		Caragiulo, A., Kang, Y., Rabinowitz, S., Dias-Freedman, I., Loss, S., Zhou, X.-W., Bao, W.-D., & Amato, G. (2015). Presence of the Endangered Amur tiger Panthera tigris altaica in Jilin Province, China, detected using non-invasive genetic techniques. Oryx, 49(4), 632–635. https://doi.org/10.1017/S0030605314000817
266		Chakma, S. (2016). Assessment of large mammals of the Chittagong Hill Tracts of Bangladesh with emphasis on tiger (Panthera tigris) [Ph.D. dissertation, University of Dhaka]. http://repository.library.du.ac.bd:8080/bitstream/handle/123456789/1338/Suprio%20Chakma.pdf?sequence=1&isAllowed=y
31		Chanchani, P. (2015). Pilibhit Tiger Reserve. Economic and Political Weekly, 50(20), 11.
29		Chanchani, P., Bista, A., Warrier, R., Nair, S., Sharma, R., Hassan, D., & Gupta, M. (2014). Status and conservation of tigers and their prey in the Uttar Pradesh Terai. WWF-India.
30		Chanchani, P., Lamichhane, B. R., Malla, S., Maurya, K., Bista, A., Warrier, R., Nair, S., Almeida, M., Ravi, R., & Sharma, R. (2014). Tigers of the Transboundary Terai Arc Landscape: Status, distribution and movement in the Terai of India and Nepal (p. 3). National Tiger Conservation Authority, Government of India, and Department of National Park and Wildlife Conservation, Government of Nepal NT…
32		Chatterjee, A. B., Saha, R., Chowdhury, R., Guha, S., & Choudhury, A. (2018). Status of Tigers in the Sundarban Biosphere Reserve: Session 2015-2016. (p. 52). WWF-India.
34		Chatterjee, N., Schuttler, S. G., Nigam, P., & Habib, B. (2021). Deciphering the rarity–detectability continuum: Optimizing survey design for terrestrial mammalian community. Ecosphere, 12(9), e03748. https://doi.org/10.1002/ecs2.3748
33		Chatterjee, P., Mondal, K., Tripathy, B., & Chandra, K. (2020). First photographic evidence of Panthera tigris from Neora Valley National Park, Central Himalayas, India. Records of the Zoological Survey of India, 120, 89–91. https://doi.org/10.26515/rzsi/v120/i1/2020/144036
35		Chauhan, D. S., Singh, R., Mishra, S., Dadda, T., & Goyal, S. P. (2006). Estimation of tiger population in an intensive study area of Pakke Tiger Reserve, Arunachal Pradesh, India. Wildlife Institute of India, Dehradun, India. Contents.
267		Chhin, S., Souter, N. J., Ngoprasert, D., Browne, S. J., & Savini, T. (2019). Population density and habitat loss of Chestnut-headed Partridge Arborophila cambodiana in south-west Cambodia. Bird Conservation International, 29(4), 1–12.
36		Choudhury, A. (2003). The mammals of Arunachal Pradesh. Regency Publications.
38		Chowdhury, D. R., Das, S. K., Sarkar, P. K., Choudhury, T., Borah, J., & Saha, R. (2018). Monitoring of Tigers in the Sundarban Biosphere Reserve (2014-2015), 24 Parganas (South) Forest Division and Basirhat Range, India. (p. 35). WWF-India.
37		Chowdhury, R. D., Das, S. K., & Saha, R. (2018). Status of Tigers in the Sundarban Biosphere Reserve: Session 2015-2016 (p. 54). WWF-India.
39		Chundawat, R. S., Gogate, N., & Johnsingh, A. J. T. (1999). Tigers in Panna: Preliminary results from an Indian tropical dry forest. In J. Seidensticker, S. Christie, & P. Jackson (Eds.), Riding the Tiger: Tiger Conservation in Human-Dominated Landscapes (pp. 123–129). Cambridge University Press.
268		Chutipong, W., Tantipisanuh, N., Ngoprasert, D., Lynam, A. J., Steinmetz, R., Jenks, K. E., Sukmasuang, G.A.G., Harich, F.K., Treydte, A.C., & Cutter, P. (2014). Current distribution and conservation status of small carnivores in Thailand: A baseline review. Small Carnivore Conservation, 51, 96–136.
269		Cita, K. D., Adila, R. A., Hardianto, R. I., Adib, M. F., & Setyaningsih, L. (2022). Wildlife Camera Trapping: Estimating the Abundance of Sumatran Tiger’s Prey in Way Kambas National Park. IOP Conference Series: Earth and Environmental Science, 959(1), 012020. https://doi.org/10.1088/1755-1315/959/1/012020
270		Coudrat, C. N. Z., Nanthavong, C., Sayavong, S., Johnson, A., Johnston, J. B., & Robichaud, W. G. (2014). Non-Panthera cats in Nakai–Nam Theun National Protected Area, Lao PDR. Cat News, Special, 8, 45–52.
40		Creative Conservation Alliance. (2016). A Preliminary Wildlife Survey in Sangu-Matamuhuri Reserve Forest, Chittagong Hill Tracts, Bangladesh. Creative Conservation Alliance. https://storage.googleapis.com/plos-corpus-prod/10.1371/journal.pone.0175450/1/pone.0175450.s008.pdf?X-Goog-Algorithm=GOOG4-RSA-SHA256&X-Goog-Credential=wombat-sa%40plos-prod.iam.gserviceaccount.com%2F20211012%2Fauto%2Fstorag…
271		Cremonesi, G., Bisi, F., Gaffi, L., Zaw, T., Naing, H., Moe, K., Aung, Z., Mazzamuto, M. V., Gagliardi, A., Wauters, L. A., Preatoni, D. G., & Martinoli, A. (2021). Camera Trapping to Assess Status and Composition of Mammal Communities in a Biodiversity Hotspot in Myanmar. Animals, 11(3), 880. https://doi.org/10.3390/ani11030880
41		Cutter, P. G. (2014). Landscape-scale Conservation Planning and Wildlife Monitoring in Southeast Asia [Ph.D. dissertation]. University of Minnesota.
43		Dakpa, R., & Dhendup, T. (2021). Camera trap records a tiger close to Phrumsengla National Park in Central Bhutan. Cat News, 72, 4–5.
42		Das, S. K., Sarkar, P. K., Saha, R., Vyas, P., Dana, A. A., & Vattakavan, J. (2012). Status of Tigers in Sundarban Biosphere Reserve: 24-Parganas (South) Forest Division, West Bengal, India. WWF-India. http://awsassets.wwfindia.org/downloads/status_of_tigers_in_24_parganas__south__forest_division_08_10_12.pdf
44		Datta, A., Anand, M. O., & Naniwadekar, R. (2008). Empty forests: Large carnivore and prey abundance in Namdapha National Park, north-east India. Biological Conservation, 141(5), 1429–1435.
273		Debata, S., & Swain, K. K. (2018). Estimating mammalian diversity and relative abundance using camera traps in a tropical deciduous forest of Kuldiha Wildlife Sanctuary, eastern India. Mammal Study, 43(1), 45–53.
45		Department of Wildlife and National Parks - Peninsula Malaysia. (2008). National tiger action plan for Malaysia, 2008-2020 (Cet. 1) [Electronic resource]. Malayan Tiger Conservation Workshop, Kuala Lumpur, Malaysia. Dept. of Wildlife and National Parks Peninsular Malaysia. http://www.wildlife.gov.my/images/stories/penerbitan/lain_lain/TAP.pdf
46		Dey, T. K., Kabir, M. J., Ahsan, M. M., Islam, M. M., Chowdhury, M. M. R., Hassan, S., Roy, M., Qureshi, Q., Naha, D., Kumar, U., & Jhala, Y. V. (2015). First Phase Tiger Status Report of Bangladesh Sundarbans (p. 28). Wildlife Institute of India and Bangladesh Forest Department.
47		Dhakal, M., Karki (Thapa), M., Jnawali, S. R., Subedi, N., Pradhan, N. M. B., Malla, S., Lamichhane, B. R., Pokheral, P. C., Thapa, G. J., Oglethorpe, J., Subba, S. A., Bajracharya, P. R., & Yadav, H. (2014). Status of Tigers and Prey in Nepal (p. 73). Department of National Parks and Wildlife Conservation.
48		Dhendup, T. (2019). Tiger Monitoring in Bhutan Using Non-invasive Genetic Tools [M.S. Thesis]. University of Montana.
49		Dinata, Y. (2008). Assessing the conservation status of tigers In West Sumatra, Final report to Conservation Leadership Program (p. 18).
50		Dinerstein, E., Wikramanayake, E., Robinson, J. G., Karanth, K. U., Rabinowitz, A. R., Olson, D. M., Matthew, T., Hedao, P., & Connor, M. (1997). A Framework for Identifying High Priority Areas and Actions for the Conservation of Tigers in the Wild. World Wildlife Fund-US, Wildlife Conservation Society, National Fish and Wildlife Foundation’s Save the Tiger Fund. https://www.panthera.org/sites/de…
51		DNPWC & DFSC. (2018). Status of Tigers and Prey in Nepal, 2018. Department of National Parks and Wildlife Conservation & Department of Forests and Soil Conservation, Ministry of Forests and Environment. https://ntnc.org.np/sites/default/files/doc_publication/2019-04/Tiger_prey%20report%202019.pdf
52		Dorazio, R. M., & Karanth, K. U. (2017). A hierarchical model for estimating the spatial distribution and abundance of animals detected by continuous-time recorders. PLOS ONE, 12(5), e0176966. https://doi.org/10.1371/journal.pone.0176966
53		Duangchantrasiri, S., Umponjan, M., Simcharoen, S., Pattanavibool, A., Chaiwattana, S., Maneerat, S., Kumar, N. S., Jathanna, D., Srivathsa, A., & Karanth, K. U. (2016). Dynamics of a low-density tiger population in Southeast Asia in the context of improved law enforcement. Conservation Biology, 30(3), 639–648. https://doi.org/10.1111/cobi.12655
274		Duckworth, J. W., Hallam, C., Phimmachak, S., Sivongxay, N., Stuart, B. L., & Vongsa, O. (2010). A conservation reconnaissance survey of north-east Vilabouli district, Savannakhet province, Lao PDR (p. 99). Wildlife Conservation Society - Laos PDR.
55		Duckworth, J. W., Salter, R. E., & Khounboline, K. (1999). Wildlife in Lao PDR: 1999 Status Report. IUCN.
54		Duckworth, W., & Hedges, S. (1998). Tracking Tigers: A review of the Status of Tiger, Asian Elephant, Gaur, and Banteng in Vietnam, Lao, Cambodia, and Yunnan (China), with Recommendations for Future Conservation Action. WWF Indochina Programme, Hanoi, Vietnam.
56		Eames, J. (2022, April 5). Personal communication from Jon Eames to Tom Gray [Letter to Thomas N.E. Gray].
275		Edwards, S., Allison, J., Cheetham, S., & Hoeun, B. (2012). Mammal and bird diversity at a salt lick in Kulen-Promtep Wildlife Sanctuary, Northern Cambodia. Cambodian Journal of Natural History, 2012(1), 56–63.
57		Emmett, D., Olsson, A., Burton, C., & Rubidge, E. (2015). Biological surveys in the Central Cardamom Mountains. https://doi.org/10.13140/RG.2.1.3289.0087
277		Faiznur, A. A. B., Yasuda, M., Maryati, M., Adlil, I. S., & Halid, M. S. (2020). The First Record of Sumatran Serow, Capricornis sumatraensis (Bovidae, Cetartiodactyla), in Gunung Ledang Johor National Park, a Tropical Forest Remnant on the Southern Malay Peninsula. Mammal Study, 45(3), 259–264. https://doi.org/10.3106/ms2020-0022
58		Feng, L., Lin, L., Zhang, L., Wang, L., Wang, B., Yang, S., Smith, J. L. D., Luo, S.-J., & Zhang, L. (2008). Evidence of Wild Tigers in Southwest China–A Preliminary Survey of the Xishuangbanna National Nature Reserve. Cat News, 48, 5.
59		Feng, L., Wang, L., Wang, B., Smith, J. L., & Zhang, L. (2013). Population status of the Indochinese tiger (Panthera tigris cobetti) and density of the three primary ungulate prey species in Shangyong Nature Reserve, Xishuangbanna, China. Acta Theriologica Sinica, 33(4), 308–318.
60		Figel, J. J., Hambal, M., Krisna, I., Putra, R., & Yansyah, D. (2021). Malignant Snare Traps Threaten an Irreplaceable Megafauna Community. Tropical Conservation Science, 14, 194008292198918. https://doi.org/10.1177/1940082921989187
279		Franklin, N. (2002). Conservation Biology of the Sumatran Tiger in Way Kambas National Park, Sumatra, Indonesia. [PhD Dissertation]. University of York.
61		Ganguli-Lachungpa, U. (1998). On the occurrence of the tiger Panthera tigris in Sikkim. The Journal of the Bombay Natural History Society., 95(1), 109–110.
62		Gardner, B., Sollmann, R., Kumar, N. S., Jathanna, D., & Karanth, K. U. (2018). State space and movement specification in open population spatial capture–recapture models. Ecology and Evolution, 8, 10336–10344. https://doi.org/10.1002/ece3.4509
280		Ghazali, A. N., Meisery, A., Adam, L., Hasnan, M. H. S., Yazi, M. F., Patah, P. A., Rozi, M., Rasid, A. F. A., & Tan, C. C. (2019). Wildlife monitoring at Labis Timur Ecological Corridor (CFS2: PL1) in Johor, Malaysia. Journal of Wildlife and Parks, 34, 2.
63		Gopal, R., Qureshi, Q., Bhardwaj, M., Singh, R., & Jhala, Y. V. (2010). Evaluating the status of the Endangered tiger Panthera tigris and its prey in Panna Tiger Reserve, Madhya Pradesh, India. Oryx, 44(3), 383–389.
65		Gopalaswamy, A. M., Royle, J. A., Delampady, M., Nichols, J. D., Karanth, K. U., & Macdonald, D. W. (2012). Density estimation in tiger populations: Combining information for strong inference. Ecology, 93(7), 1741–1751.
64		Gopalaswamy, A. M., Royle, J. A., Hines, J. E., Singh, P., Jathanna, D., Kumar, N., & Karanth, K. U. (2012). Program SPACECAP: software for estimating animal density using spatially explicit capture–recapture models. Methods in Ecology and Evolution, 3(6), 1067–1072.
66		Gopi, G. V., Qureshi, Q., & Jhala, Y. V. (2014). A Rapid Field Survey of Dibang Valley District: Arunachal Pradesh.
67		Grassman, L. I., Haines, A. M., Janečka, J. E., & Tewes, M. E. (2006). Activity periods of photo-captured mammals in north central Thailand/Périodes d’activité des mammifères photo-capturés en Thïlande. Mammalia, 70(3/4), 306–309. https://doi.org/DOI 10.1515/MAMM.2006.048
286		Gray, T. (2013). Personal Correspondence: Gray, Thomas, Lao Xe Sap Camera Trap Records 2013 [Personal communication].
287		Gray, T. N. E. (2018). Monitoring tropical forest ungulates using camera‐trap data. Journal of Zoology, 305(3), 173–179.
281		Gray, T. N. E., & Phan, C. (2011). Habitat preferences and activity patterns of the larger mammal community in Phnom Prich Wildlife Sanctuary, Cambodia. The Raffles Bulletin of Zoology, 59(2), 311–318.
282		Gray, T. N. E., & Prum, S. (2012). Leopard density in post‐conflict landscape, Cambodia: Evidence from spatially explicit capture–recapture. The Journal of Wildlife Management, 76(1), 163–169.
284		Gray, T. N. E., Billingsley, A., Crudge, B., Frechette, J. L., Grosu, R., Herranz-Muñoz, V., Holden, J., Omaliss, K. E. O., Kimsreng, K., & MACDONALD, D. (2017). Status and conservation significance of ground-dwelling mammals in the Cardamom Rainforest Landscape, southwestern Cambodia. Cambodian Journal of Natural History, 2017, 38–48.
68		Gray, T. N. E., Ou, R., Huy, K., Pin, C., & Maxwell, A. L. (2012). The status of large mammals in eastern Cambodia: A review of camera trapping data 1999–2007. Cambodian Journal of Natural History, 42.
283		Gray, T. N. E., Phan, C., Chanrattanak, P., & Sovanna, P. (2014). The status of jungle cat and sympatric small cats in Cambodia’s Eastern Plains. Cat News, 8, 19–23.
69		Greenspan, E., Montgomery, C., Stokes, D., Wantai, S., & Moo, S. S. B. (2020). Prioritizing areas for conservation action in Kawthoolei, Myanmar using species distribution models. Journal for Nature Conservation, 58, 125918. https://doi.org/10.1016/j.jnc.2020.125918
70		Grey, J. (2009). Prey selection by tigers (Panthera tigris tigris) in the Karnali floodplain of Barida National Park, Nepal [M.S. Thesis]. Imperial College London.
71		Griffin, O. (2021). WCS Cambodia Biodiversity Database Tiger Record Query 1996-2007. Wildlife Conservation Society.
72		Gu, J., Alibhai, S. K., Jewell, Z. C., Jiang, G., & Ma, J. (2014). Sex determination of Amur tigers (Panthera tigris altaica) from footprints in snow. Wildlife Society Bulletin, 38(3), 495–502. https://doi.org/10.1002/wsb.432
73		Gubbi, S., Harish, N. S., Kolekar, A., Poornesha, H. C., Reddy, V., Mumtaz, J., & Madhusudan, M. D. (2017). From intent to action: A case study for the expansion of tiger conservation from southern India. Global Ecology and Conservation, 9, 11–20.
74		Gubbi, S., Nagashettihalli, H., Suthar, S., & Menon, A. M. (2019). Leopards of Bannerghatta National Park: A camera-trapping exercise to estimate abundance and densities of leopards (p. 25). Nature Conservation Foundation.
75		Habib, B., Nigam, P., Ghaskabadi, P., Praveen, N. R., Sinha, V., Ladkat, N. S., Guruprasad, G., & Bhagwat, S. (2020). Status of Tigers, Co-Predator and Prey in Tadoba Andhari Tiger Reserve (TATR) 2019 (p. 47). Wildlife Institute of India & Maharashtra Forest Department.
289		Habib, B., Talukdar, G., Lyngdoh, S., Pandav, B., Nigam, P., Kaur, A., Ghaskabadi, P., & Zaffar, R. M. (2015). Ecological status of the leopard (Panthera pardus) in Kalesar National Park, Haryana, India (p. 52). Haryana FD & WII.
76		Hance, J. (2012, April 16). Camera traps discover tigers, elephants in “empty” forest park. Mongabay Environmental News. https://news.mongabay.com/2012/04/camera-traps-discover-tigers-elephants-in-empty-forest-park/
77		Harihar, A., & Pandav, B. (2012). Influence of connectivity, wild prey and disturbance on occupancy of tigers in the human-dominated western Terai Arc Landscape. PLoS One, 7(7), e40105. https://doi.org/10.1371/journal.pone.0040105
81		Harihar, A., Chanchani, P., Borah, J., Crouthers, R. J., Darman, Y., Gray, T. N. E., Mohamad, S., Rawson, B. M., Rayan, M. D., & Roberts, J. L. (2018). Recovery planning towards doubling wild tiger Panthera tigris numbers: Detailing 18 recovery sites from across the range. PloS One, 13(11), e0207114.
82		Harihar, A., Ghosh-Harihar, M., & MacMillan, D. C. (2018). Losing time for the tiger Panthera tigris: Delayed action puts a globally threatened species at risk of local extinction. Oryx, 52(1), 78–88. https://doi.org/10.1017/S0030605317001156
78		Harihar, A., Pandav, B., & Goyal, S. P. (2009). Responses of tiger (Panthera tigris) and their prey to removal of anthropogenic influences in Rajaji National Park, India. European Journal of Wildlife Research, 55(2), 97–105. https://doi.org/10.1007/s10344-008-0219-2
80		Harihar, A., Pandav, B., & Goyal, S. P. (2011). Responses of leopard Panthera pardus to the recovery of a tiger Panthera tigris population. Journal of Applied Ecology, 48(3), 806–814. https://doi.org/10.1111/j.1365-2664.2011.01981.x
83		Harihar, A., Pandav, B., Ghosh-Harihar, M., & Goodrich, J. (2020). Demographic and ecological correlates of a recovering tiger (Panthera tigris) population: Lessons learnt from 13-years of monitoring. Biological Conservation, 252, 108848. https://doi.org/10.1016/j.biocon.2020.108848
79		Harihar, A., Prasad, D. L., Ri, C., Pandav, B., & Goyal, S. P. (2009). Losing ground: Tigers Panthera tigris in the north-western Shivalik landscape of India. Oryx, 43(01), 35–43. https://doi.org/10.1017/S0030605307072043
84		Hashim, A. K. B. A. (2021). Malaysian National Tiger Survey [Letter to Urs Breitenmoser].
290		Hayes, B., Mould, A., Khou, E. H., Hartmann, T., Hoa, K., Calame, T., & Yon, T. (2013). A biodiversity assessment of Phnom Kulen National Park with recommendations for management. Cambodia: Angkor Centre for Conservation of Biodiversity.
291		Hein, Z., Soe, P., Cox, N., Williams, C., Htun, N., Oo, T., Ya, Y., Htun, Y., & K, Y. (2020). Status of two species of threatened wild cattle (Bos gaurus and Bos javanicus birmanicus) in North Zamari Wildlife Sanctuary, Bago Region, Myanmar. BULLetin: Journal of the IUCN SSC Asian Wild Cattle Specialist Group, 5, 18–26.
85		Hossain, A. N. M., Lynam, A. J., Ngoprasert, D., Barlow, A., Barlow, C. G., & Savini, T. (2018). Identifying landscape factors affecting tiger decline in the Bangladesh Sundarbans. Global Ecology and Conservation, 13, e00382. https://doi.org/10.1016/j.gecco.2018.e00382
86		Htun, S. (2019). Sending photographs, GPS coordinates and relevant information on eight tigers captured by camera trap surveys in Htamanthi Wildlife Sanctuary [Personal communication].
87		Huda, R., Anirudh, N. B., & Sanchez, K. L. (2018). Diversity of carnivorous mammals in Batutegi Nature Reserve, Lampung, Sumatra. Journal of Indonesian Natural History, 6(1), 33–41.
88		Hunter, L., & Gray, C. (2021). A Future for Tigers: Assuring the Recovery and Long-term Conservation of the Most Endangered Big Cat. Wildlife Conservation Society.
89		Jambari, A., Sasidhran, S., Abdul Halim, H. R., Mohamed, K. A., Ashton-Butt, A., Lechner, A. M., & Azhar, B. (2019). Quantifying species richness and composition of elusive rainforest mammals in Taman Negara National Park, Peninsular Malaysia. Global Ecology and Conservation, 18, e00607. https://doi.org/10.1016/j.gecco.2019.e00607
90		Jelil, S., Gaykar, A., Girkar, N., Vyas, V., Ben, V., & Ramesh, K. (2020). Recent record of tiger from Sahyadri Tiger Reserve, India. Cat News, 71, 16–17.
91		Jena, J., Borah, J., Dave, C., & Vattakavan, J. (2011). Lifeline for Tigers: Status and Conservation of the Kanha-Pench Corridor, WWF-India, New Delhi, India. (p. 52). WWF-India.
293		Jenks, K. E., Songsasen, N., & Leimgruber, P. (2012). Camera trap records of dholes in Khao Ang Rue Nai Wildlife Sanctuary, Thailand. Canid News.
292		Jenks, K., Chanteap, P., Damrongchainarony, K., Cutter, P., Cutter, P., Redford, T., Lynam, A. J., Howard, J., & Leimgruber, P. (2011). Using relative abundance indices from camera­ trapping to test wildlife conservation hypotheses—An example from Khao Yai National Park, Thailand. Tropical Conservation Science, 4(2), 113–131. https://doi.org/10.1177/194008291100400203
97		Jhala, Y. V., Dey, T. K., Qureshi, Q., Kabir, M. J., Borah, J., & Roy, M. (2016). Status of Tigers in the Sundarban Landscape Bangladesh and India (p. 66). Bangladesh Forest Department; National Tiger Conservation Authority; Wildlife Institute of India.
93		Jhala, Y. V., Gopal, R., & Qurushi, R. (2008). Status of Tigers, Co-predators, and Prey in India [2008]. National Tiger Conservation Authority and Wildlife Institute of India.
96		Jhala, Y. V., Qureshi, Q., & Gopal, R. (2015). Status of tigers, copredators & prey in India, 2014. (p. 456). National Tiger Conservation Authority and Wildlife Institute of India.
92		Jhala, Y. V., Qureshi, Q., Gopal, R., & Sinha, P. R. (2011). Status of tigers, co-predators and prey in India, 2010 (p. 279). National Tiger Conservation Authority, Govt. of India and Wildlife Institute of India.
98		Jhala, Y. V., Qurushi, R., & Nayak, A. K. (2018). Status of Tigers, Co-predators, and Prey 2018. Summary Report. National Tiger Conservation Authority, Government of India, New Delhi & Wildlife Institute of India, Dehradun.
95		Jhala, Y., Qureshi, Q., & Gopal, R. (2011). Can the abundance of tigers be assessed from their signs? Journal of Applied Ecology, 48(1), 14–24.
99		Jiang, G., Sun, H., Lang, J., Yang, L., Li, C., Lyet, A., Long, B., Miquelle, D. G., Zhang, C., Aramilev, S., Ma, J., & Zhang, M. (2014). Effects of environmental and anthropogenic drivers on Amur tiger distribution in northeastern China. ECOLOGICAL RESEARCH, 29(5), 801–813. https://doi.org/10.1007/s11284-014-1160-3
100		Jiang, J. (2000). Tiger and Leopard Research in Jilin Province. In D. Miquelle, E. Zhang, M. Jones, & T. Jin (Eds.), Workshop to Develop a Recovery Plan for the Wild North China Tiger Population: Proceedings (pp. 16–20). Heilongjiang Forestry Department; Wildlife Conservation Society.
101		Johnsingh, A. J. T., & Negi, A. S. (2003). Status of tiger and leopard in Rajaji–Corbett Conservation Unit, northern India. Biological Conservation, 111(3), 385–393. https://doi.org/10.1016/S0006-3207(02)00307-5
102		Johnsingh, A. J. T., Sankar, K., & Mukherjee, S. (1997). Saving Prime Tiger Habitat in Sariska Tiger Reserve. Cat News, 27, 3–4.
103		Johnson, A., Vongkhamheng, C., Hedemark, M., & Saithongdam, T. (2006). Effects of human-carnivore conflict on tiger (Panthera tigris) and prey populations in Lao PDR. Animal Conservation, 9(4), 421. https://doi.org/10.1111/j.1469-1795.2006.00049.x
104		Jorio, L. (2000). Wild cat survey of coastal southern Myanmar. Tigerpaper, 27, 7–8.
105		Kalle, R., Ramesh, T., Qureshi, Q., & Sankar, K. (2011). Density of tiger and leopard in a tropical deciduous forest of Mudumalai Tiger Reserve, southern India, as estimated using photographic capture–recapture sampling. Acta Theriologica, 56(4), 335–342.
106		Karanth, K. U., & Nichols, J. D. (1998).Estimation of Tiger Densities in India using Photographic Captures and Recaptures. 79(8), 11.
107		Karanth, K. U., & Nichols, J. D. (2000). Ecological status and conservation of tigers in India. Final Technical Report (February 1995 to January 2000). US Fish and Wildlife Services, Wildlife Conservation Society, and Centre for Wildlife Studies. https://pubs.er.usgs.gov/publication/5200239
108		Karanth, K. U., Chundawat, R. S., Nichols, J. D., & Kumar, N. (2004). Estimation of tiger densities in the tropical dry forests of Panna, Central India, using photographic capture–recapture sampling. Animal Conservation, 7(3), 285–290.
111		Karanth, K. U., Nichols, J. D., Harihar, A., Miquelle, D. G., Kumar, N. S., & Dorazio, R. M. (2017). Field Practices: Assessing Tiger Population Dynamics Using Photographic Captures. In K. U. Karanth & J. D. Nichols (Eds.), Methods For Monitoring Tiger And Prey Populations (pp. 191–224). Springer. https://doi.org/10.1007/978-981-10-5436-5_10
110		Karanth, K. U., Nichols, J. D., Kumar, N. S., & Hines, J. E. (2006). Assessing tiger population dynamics using photographic capture–recapture sampling. Ecology, 87(11), 2925–2937. https://doi.org/10.1890/0012-9658(2006)87[2925:ATPDUP]2.0.CO;2
109		Karanth, K. U., Nichols, J. D., Kumar, N. S., Link, W. A., & Hines, J. E. (2004). Tigers and their prey: Predicting carnivore densities from prey abundance. Proceedings of the National Academy of Sciences, 101(14), 4854–4858. https://doi.org/10.1073/pnas.0306210101
112		Karen Wildlife Conservation Initiative. (2020). Tiger Conservation in the Dawna-Karen Hills.
116		Karki, J. B. (2010). Chapter Five: Estimating Tiger Abundance Through Camera Trap in Terai Arc Landcape, Nepal.
117		Karki, J. B. (2011). Abundance of Tiger in Chitwan National Park, Nepal. In Occupancy and Abundance of Tigers and their Prey in the Terai Arc Landscape, Nepal (pp. 167–167).
115		Karki, J. B., Jhala, Y. V., Pandav, B., Jnawali, S. R., Shrestha, R., Thapa, K., Thapa, G., Pradhan, N. M. B., Lamichane, B. R., & Barber-Meyer, S. M. (2016). Estimating tiger and its prey abundance in Bardia National Park, Nepal. Banko Janakari, 26(1), 60–69.
113		Karki, J. B., Jnawali, S. R., Shrestha, R., Pandey, M. B., Gurung, G., & Karki (Thapa), M. (2009). Tiger and their prey base abundance in Terai Arc Landscape, Nepal. Department of National Parks and Wildlife Conservation and Department of Forests.
114		Karki, J. B., Pandav, B., Jnawali, S. R., Shrestha, R., Pradhan, N. M. B., Lamichane, B. R., Khanal, P., Subedi, N., & Jhala, Y. V. (2015). Estimating the abundance of Nepal’s largest population of tigers Panthera tigris. Oryx, 49(1), 150–156.
119		Kawanishi, K. (2020). Populaton Status of Tigers (Panthera tigris) in a primary rainforest of Peninsular Malaysia. University of Florida.
118		Kawanishi, K., & Sunquist, M. E. (2004). Conservation status of tigers in a primary rainforest of Peninsular Malaysia. Biological Conservation, 120(3), 329–344.
120		Kerley, L. L., Goodrich, J. M., Miquelle, D. G., Smirnov, E. N., Quigley, H. B., & Hornocker, M. G. (2002). Effects of Roads and Human Disturbance on Amur Tigers. Conservation Biology, 16(1), 97–108.
121		Khan, M., M. H. (2004). Ecology and Conservation of the Bengal Tiger in the Sundarbans Mangrove Forest of Bangladesh [PhD Dissertation]. Cambridge University.
296		King, A., Behie, A. M., Hon, N., & Rawson, B. M. (2016). Patterns of salt lick use by mammals and birds in northeastern Cambodia. Cambodian Journal of Natural History, 1, 40–50.
122		Koenig, A., Suarez, S., Kreetiyutatont, K., & Prabnasuk, J. (2004). Sighting of an Indochinese Tiger (Panthera tigris corbetti) cub at Phu Khieo Wildlife Sanctuary, northeast Thailand. Natural History Bulletin of the Siam Society, 52(2), 219–220.
123		Kostyria, A., & Belozor, A. A. (2002). Report on accounting of the Amur tiger with the use of camera traps in the Ussuri Nature Reserve and surrounding areas in the winter and summer periods of 2002 (p. 23). WCS-Russia & ISUNR.
124		Krishnamurthy, G., Rajput, A., Majumder, A., & Ali, Z. (2016). Bandhavgarh Tiger Reserve: Status of Tigers and Prey—2016 (p. 54). Madhya Pradesh State Forest Research Institute.
125		Kumar, U., Awasthi, N., Qureshi, Q., & Jhala, Y. (2019). Do conservation strategies that increase tiger populations have consequences for other wild carnivores like leopards? Scientific Reports, 9(1), 1–8.
126		Lahkar, D., Ahmed, F., & Harihar, A. (2015). Tigers of Trans-boundary Manas Conservation Area. http://rgdoi.net/10.13140/RG.2.2.21023.00161
128		Lamichhane, B. R., Leirs, H., Persoon, G. A., Subedi, N., Dhakal, M., Oli, B. N., Reynaert, S., Sluydts, V., Pokheral, C. P., Poudyal, L. P., Malla, S., & de Iongh, H. H. (2019). Factors associated with co-occurrence of large carnivores in a human-dominated landscape. Biodiversity and Conservation, 28(6), 1473–1491. https://doi.org/10.1007/s10531-019-01737-4
127		Lamichhane, B. R., Pokheral, C. P., Poudel, S., Adhikari, D., Giri, S. R., Bhattarai, S., Bhatta, T. R., Pickles, R., Amin, R., & Acharya, K. P. (2018). Rapid recovery of tigers Panthera tigris in Parsa Wildlife Reserve, Nepal. Oryx, 52(1), 16–24.
129		Lazarus, B. A., Che-Amat, A., Abdul Halim Shah, M. M., Hamdan, A., Abu Hassim, H., Mustaffa Kamal, F., Tengku Azizan, T. R. P., Mohd Noor, M. H., Mohamed Mustapha, N., & Ahmad, H. (2021). Impact of natural salt lick on the home range of Panthera tigris at the Royal Belum Rainforest, Malaysia. Scientific Reports, 11(1), 10596. https://doi.org/10.1038/s41598-021-89980-0
297		Li, F., Huang, X. Y., Zhang, X. C., XX Z, J. Y., & Chan, B. P. L. (2019). Mammals of Tengchong Section of Gaoligongshan National Nature Reserve in Yunnan Province. China. Journal of Threatened Taxa, 11(11), 14402–14414.
130		Li, X., Bleisch, W. V., Liu, X., & Jiang, X. (2021). Camera-trap surveys reveal high diversity of mammals and pheasants in Medog, Tibet. Oryx, 55(2), 177–180. https://doi.org/10.1017/S0030605319001467
131		Lingaraja, S. S., Chowdhary, S., Bhat, R., & Gubbi, S. (2017). Evaluating a Survey Landscape for Tiger Abundance in the Confluence of the Western and Eastern Ghats. Current Science, 113(09), 1759. https://doi.org/10.18520/cs/v113/i09/1759-1763
134		Linkie, M., & Ridout, M. S. (2011). Assessing tiger-prey interactions in Sumatran rainforests. JOURNAL OF ZOOLOGY, 284(3), 224–229. https://doi.org/10.1111/j.1469-7998.2011.00801.x
133		Linkie, M., Chapron, G., Martyr, D. J., Holden, J., & Leader-Williams, N. (2006). Assessing the viability of tiger subpopulations in a fragmented landscape. Journal of Applied Ecology, 43(3), 576–586. https://doi.org/10.1111/j.1365-2664.2006.01153.x
135		Linkie, M., Haidir, I. A., Nugroho, A., & Dinata, Y. (2008). Conserving tigers Panthera tigris in selectively logged Sumatran forests. Biological Conservation, 141(9), 2410–2415.
132		Linkie, M., Martyr, D. J., Holden, J., Yanuar, A., Hartana, A. T., Sugardjito, J., & Leader-Williams, N. (2003). Habitat destruction and poaching threaten the Sumatran tiger in Kerinci Seblat National Park, Sumatra. Oryx, 37(1), 41–48.
137		Long, B. (1999). Personal Correspondence: Long, Barney Vietnam Tiger Observations 1999 [Personal communication].
136		Long, B. (2001). Tiger Conservation and Survey Training for the Central Vietnam Tiger Corridor (p. 53). WWF Indonchina Programme.
298		Loveridge, R., Cusack, J. J., Eames, J. C., & Samnang, E. (2018). Mammal records and conservation threats in Siem Pang Wildlife Sanctuary and Siem Pang Khang Lech Wildlife Sanctuary, Cambodia. 15.
138		Lubis, M. I., Pusparini, W., Prabowo, S. A., Marthy, W., Tarmizi, Andayani, N., & Linkie, M. (2020). Unraveling the complexity of human–tiger conflicts in the Leuser Ecosystem, Sumatra. Animal Conservation, 23(6), 741–749. https://doi.org/10.1111/acv.12591
139		Lukarevskiy, V. (2021, November 23). [Tiger sighting by Ivanov Andrei Alexandrovich in second half of 2021 at the mouth of the Bollokhtoh river, Yakutia, Russia]. Facebook. https://www.facebook.com/victor.lukarevskiy/posts/4665247176829857
140		Luskin, M. S., Albert, W. R., & Tobler, M. W. (2017). Sumatran tiger survival threatened by deforestation despite increasing densities in parks. Nature Communications, 8(1), 1783. https://doi.org/10.1038/s41467-017-01656-4
299		Lwin, Y. H., Wang, L., Li, G., Maung, K. W., Swa, K., & Quan, R.-C. (2021). Diversity, distribution and conservation of large mammals in northern Myanmar. Global Ecology and Conservation, 29, e01736. https://doi.org/10.1016/j.gecco.2021.e01736
142		Lynam, A. J. (2003). A National Tiger Action Plan For The Union of Myanmar (p. 76). Myanmar Forest Department & WCS.
141		Lynam, A. J., Khaing, S. tun, & Zaw, K. M. (2006). Developing a National Tiger Action Plan for the Union of Myanmar. Environmental Management, 37(1), 30–39. https://doi.org/10.1007/s00267-004-0273-9
300		Lynam, A. J., Kreetiyutanont, K., & Mather, R. (2001). Conservation status and distribution of the Indochinese tiger (Panthera tigris corbetti) and other large mammals in a forest complex in northeastern Thailand. Natural History Bulletin of the Siam Society, 49, 61–75.
301		Lynam, A. J., Laidlaw, R., Noordin, W. S. W., Elagupillay, S., & Bennett, E. L. (2007). Assessing the conservation status of the tiger Panthera tigris at priority sites in Peninsular Malaysia. Oryx, 41(4), 454–462.
144		Lynam, A. J., Rabinowitz, A., Myint, T., Maung, M., Latt, K. T., & Po, S. H. T. (2009). Estimating abundance with sparse data: Tigers in northern Myanmar. Population Ecology, 51(1), 115–121. https://doi.org/10.1007/s10144-008-0093-5
146		Maddox, T., Priatna, D., Gemita, E., & Salampessy, A. (2007). The conservation of tigers and other wildlife in oil palm plantations Jambi Province, Sumatra, Indonesia (p. 66). ZSL.
145		Maddox, T., Priatna, D., Smith, J., Gemita, E., & Salampessy, A. (2007). Rapid survey for tigers and other large mammals: SM Bentayan and SM Dangku (p. 61).
147		Majumder, A. (2011). Prey selection, food habits and population structure of sympatric cornivores: Tiger panthera tigris tigris (L.), Leopard Panthera pardus (L.) and Dhole Cuon alpinus (Pallas) in Pench Tiger Reserve, Madhya Pradesh (India). Saurashtra University.
148		Majumder, A., Krishnamurthy, G., Rajput, A., & Ali, Z. (2016). Status Report: Tigers, co-predators and prey in Protected Areas of Madhya Pradesh, 2016. [Technical Report]. Madhya Pradesh State Forest Research Institute.
149		Majumder, A., Krishnamurthy, G., Rapjut, A., & Ali, Z. (2016). Monitoring Predators and Prey in Satpuda Tiger Reserve (p. 43) [Technical Report]. Madhya Pradesh State Forest Research Institute.
150		Majumder, A., Qureshi, Q., Sankar, K., & Kumar, A. (2017). Long-term monitoring of a Bengal tiger (Panthera tigris tigris) population in a human-dominated landscape of Central India. European Journal of Wildlife Research, 63(1), 17.
303		Mandal, D., Basak, K., Mishra, R. P., Kaul, R., & Mondal, K. (2017). Status of leopard Panthera pardus and striped hyena Hyaena hyaena and their prey in Achanakmar Tiger Reserve, Central India. Journal of Zoology Studies, 4(4), 34–41.
151		Mann, R., Warrier, R., & Chanchani, P. (2013). Status of Tiger, Leopard and Prey in Nandhaur Valley, Baseline estimates from the sub-Himalayan Nandhaur region of Uttarakhand, India (p. 83). WWF-India.
152		Marthy, W. (2021). Unpublished summary of media accounts of human-wildlife conflict involving tigers on Sumatra, 2017—2021. Wildlife Conservation Society - Indonesia.
153		Matyushkin, E. N., Pikunov, D. G., Dunishenko, Y. M., Miquelle, D. G., Nikolaev, I. G., Smirnov, E. N., Salkina, G. P., Abramov, V. K., Bazylnikov, V. I., Yudin, V. G., & Korkishko, V. G. (1996). Numbers, distribution, and habitat status of the Amur tiger in the Russian Far East. Russian Far East Environmental Policy and Technology Project.
304		McCann, G., Pawlowski, K., McCann, G., & Willcox, D. (2017). Small carnivores’ records from Virachey National Park, north-east Cambodia. Small Carnivore Conservation, 55, 26–41.
154		Ministry of Natural Resources and the Environment. (2020). Myanmar National Tiger Action Plan. Government of Myanmar.
366		Miquelle, D. (2005). Winter Sign Survey in Russian Far East, 2004-2005. Wildlife Conservation Society.
155		Miquelle, D. (2013). Personal Correspondence: Miquelle, Dale Ad Hoc Tiger Observations China 2013 [Personal communication].
156		Miquelle, D. (2015). Wildlife Conservation Society Russia Program Annual Report 2015.
309		Miquelle, D. (2020). WCS Russia CT Records 2016-2020. Wildlife Conservation Society.
158		Miquelle, D. G. (2021). Three Surveys for Tigers in Russia [Powerpoint].
157		Miquelle, D., & Nikolaeva, K. (2017). WCS Russia Camera Trap Records Sikhote-Alin Reserve 2016-2017. Wildlife Conservation Society.
306		Miquelle, D., & Nikolaeva, K. (2020). WCS Russia CT Records 2019-2020. Wildlife Conservation Society.
307		Miquelle, D., & Nikolaeva, K. (2021). WCS Russia Camera Trap Records Sidatun Hunting Lease 2017-2021. Wildlife Conservation Society.
308		Miquelle, D., & Nikolaeva, K. (2021). WCS Russia Camera Trap Records Udege Legend National Park 2020-2021. Wildlife Conservation Society.
159		Mondol, S., Karanth, K. U., Kumar, N. S., Gopalaswamy, A. M., Andheria, A., & Ramakrishnan, U. (2009). Evaluation of non-invasive genetic sampling methods for estimating tiger population size. Biological Conservation, 142(10), 2350–2360.
160		Moo, S. S. B., Froese, G. Z. L., & Gray, T. N. E. (2018). First structured camera-trap surveys in Karen State, Myanmar, reveal high diversity of globally threatened mammals. Oryx, 52(3), 537–543. https://doi.org/10.1017/S0030605316001113
310		Mukherjee, S., Singh, P., Silva, A. P., Ri, C., Kakati, K., Borah, B., Tapi, T., Kadur, S., Choudhary, P., & Srikant, S. (2019). Activity patterns of the small and medium felid (Mammalia: Carnivora: Felidae) guild in northeastern India. Journal of Threatened Taxa, 11(4), 13432–13447.
312		Naing, H. (2021). WCS Tiger Camera Trap Surveys Htamanthi 2013-2020 & the Hukaung Valley 2017. Wildlife Conservation Society.
311		Naing, H., Fuller, T. K., Sievert, P. R., Randhir, T. O., Po, S. H. T., Maung, M., Lynam, A. J., Htun, S., Thaw, W. N., & Myint, T. (2015). Assessing large mammal and bird richness from camera-trap records in the Hukaung Valley of Northern Myanmar. RAFFLES BULLETIN OF ZOOLOGY, 63, 376–388.
161		Naing, H., Ross, J., Burnham, D., Htun, S., & Macdonald, D. W. (2017). Population density estimates and conservation concern for clouded leopards Neofelis nebulosa, marbled cats Pardofelis marmorata and tigers Panthera tigris in Htamanthi Wildlife Sanctuary, Sagaing, Myanmar. Oryx, 1–9.
162		Narasimen, R. K. (2013). Status of Tigers: Co-preditors and Prey in the Wayanad Wildlife Sanctuary. New Delhi: WWF India.
163		National Tiger Conservation Authority & Wildlife Institute of India. (2008). Status of tigers, co-predators and prey in India. https://web.archive.org/web/20130602124630/http://projecttiger.nic.in/whtsnew/status_of_tigers_in_india_2008.pdf
314		Navya, R., Athreya, V., Mudappa, D., & Raman, T. R. S. (2014). Assessing leopard occurrence in the plantation landscape of Valparai, Anamalai Hills. Current Science, 107(9), 1381–1385.
164		Ngoprasert, D., & Gale, G. A. (2019). Tiger density, dhole occupancy, and prey occupancy in the human disturbed Dong Phayayen – Khao Yai Forest Complex, Thailand. Mammalian Biology, 95, 51–58. https://doi.org/10.1016/j.mambio.2019.02.003
315		Ngoprasert, D., & Tantipisanuh, N. (2020). Personal Correspondence: King Mongkut’s University of Technology Thonburi Thailand Small Carnivore Camera Trap Database 2000-2020 [Personal communication].
317		Ngoprasert, D., Gale, G. A., & Tyre, A. J. (2019). Abundance estimation from multiple data types for group-living animals: An example using dhole (Cuon alpinus). Global Ecology and Conservation, 20, e00792.
316		Ngoprasert, D., Lynam, A. J., Sukmasuang, R., Tantipisanuh, N., Chutipong, W., Steinmetz, R., Jenks, K. E., Gale, G. A., Grassman Jr, L. I., & Kitamura, S. (2012). Occurrence of three felids across a network of protected areas in Thailand: Prey, intraguild, and habitat associations. Biotropica, 44(6), 810–817.
165		Nowell, K., Hean, S., Weiler, H., & Smith, J. L. D. (1999). National Status Survey for Tigers in Cambodia. Cat News, 8.
166		O’Brien, T. G., Kinnaird, M. F., & Wibisono, H. T. (2003). Crouching tigers, hidden prey: Sumatran tiger and prey populations in a tropical forest landscape. Animal Conservation, 6(2), 131–139.
318		O’Brien, T., & Kinnaird, M. F. (2000). WCS-Indonesia Program data from Bukit Barisan Selatan National Park, Sumatra, Indonesia. Wildlife Conservation Society.
319		O’Kelly, H. J. (2013). Monitoring conservation threats, interventions, and impacts on wildlife in a Cambodian tropical forest. Imperial College, London, 149.
255		O’Kelly, H. J., Evans, T. D., Stokes, E. J., Clements, T. J., Dara, A., Gately, M., Menghor, N., Pollard, E. H. B., Soriyun, M., & Walston, J. (2012). Identifying Conservation Successes, Failures and Future Opportunities; Assessing Recovery Potential of Wild Ungulates and Tigers in Eastern Cambodia. PLOS ONE, 7(10), e40482. https://doi.org/10.1371/journal.pone.0040482
167		Odden, M., Wegge, P., & Fredriksen, T. (2010). Do tigers displace leopards? If so, why? Ecological Research, 25(4), 875–881. https://doi.org/10.1007/s11284-010-0723-1
320		Pattanavibool, A., & Sittibal, D. (2020). WCS Thailand Camera Trap Records 2011-2020. Wildlife Conservation Society.
321		Pawlowski, K., & McCann, G. (2017). Recent records of Asian elephant Elephas maximus in Virachey National Park, north. Cambodian Journal of Natural History, 153.
322		Petersen, W. J., Savini, T., Steinmetz, R., & Ngoprasert, D. (2019). Estimating Leopard Cat Prionailurus bengalensis Kerr, 1792 (Carnivora: Felidae) density in a degraded tropical forest fragment in northeastern Thailand. Journal of Threatened Taxa, 11(4), 13448–13458.
323		Petersen, W. J., Steinmetz, R., Sribuarod, K., & Ngoprasert, D. (2020). Density and movements of mainland clouded leopards (Neofelis nebulosa) under conditions of high and low poaching pressure. Global Ecology and Conservation, e01117.
168		Phumanee, W., Steinmetz, R., Phoonjampa, R., Weingdow, S., Phokamanee, S., Bhumpakphan, N., & Savini, T. (2021). Tiger density, movements, and immigration outside of a tiger source site in Thailand. Conservation Science and Practice, 11. https://doi.org/DOI: 10.1111/csp2.560
324		Pin, C., Ngoprasert, D., Gray, T. N. E., Savini, T., Crouthers, R., & Gale, G. A. (2018). Utilization of waterholes by globally threatened species in deciduous dipterocarp forest of the Eastern Plains Landscape of Cambodia. Oryx, 1–11.
325		Project Anoulak. (2017). Annual Report 2017 (p. 63). Association Anoulak.
326		Project Anoulak. (2018). Project Anoulak: Annual Report 2018 (p. 49). Association Anoulak. https://www.conservationlaos.com/wp-content/uploads/2019/01/Annual-Report-2018-compressed-1.pdf
327		Project Anoulak. (2019). Association Anoulak: Annual Report 2019 (p. 62). Association Anoulak.
169		Punjabi, G. A., & Kulkarni, J. (2015). Examining large carnivore connectivity and creating conservation networks in the Sahyadri-Konkan corridor. Wildlife Research and Conservation Society; The Nityata Foundation.
170		Puri, M., Srivathsa, A., Karanth, K. K., Patel, I., & Kumar, N. S. (2021). Links in a sink: Interplay between habitat structure, ecological constraints and interactions with humans can influence connectivity conservation for tigers in forest corridors. Science of The Total Environment, 151106. https://doi.org/10.1016/j.scitotenv.2021.151106
171		Pusparini, W., Batubara, T., Surahmat, F., Ardiantiono, Sugiharti, T., Muslich, M., Amama, F., Marthy, W., & Andayani, N. (2018). A pathway to recovery: The Critically Endangered Sumatran tiger Panthera tigris sumatrae in an ‘in danger’ UNESCO World Heritage Site. Oryx, 52(1), 25–34. https://doi.org/10.1017/S0030605317001144
328		Puspurini, W. (2013). Wildlife Conservation Society. Indonesia LeuserTiger CT Data 2013. WCS.
172		Qi, J., Gu, J., Ning, Y., Miquelle, D. G., Holyoak, M., Wen, D., Liang, X., Liu, S., Roberts, N. J., Yang, E., Lang, J., Wang, F., Li, C., Liang, Z., Liu, P., Ren, Y., Zhou, S., Zhang, M., Ma, J., … Jiang, G. (2021). Integrated assessments call for establishing a sustainable meta-population of Amur tigers in northeast Asia. Biological Conservation, 261, 109250. https://doi.org/10.1016/j.biocon.20…
173		Rabinowitz, A. (1998). Status of the tiger in North Myanmar. Tigerpaper (FAO), 25(1), 15–19.
330		Rahman, H. A. (2017). Mammal Biodiversity in the Northeast Forest, and the Distribution of Fishing Cats in Bangladesh [M.S. Thesis]. University of Delaware.
174		Ramakrishnan, U., Coss, R. G., & Pelkey, N. W. (1999). Tiger decline caused by the reduction of large ungulate prey: Evidence from a study of leopard diets in southern India. Biological Conservation, 89(2), 113–120. https://doi.org/10.1016/S0006-3207(98)00159-1
176		Ramesh, K., Johnson, J. A., Sen, S., Murthy, R. S., Sarkar, M. S., Malviya, M., Bhardwaj, S., Naveen, M., Roamin, S., & Parihar, V. S. (2013). Status of tiger and prey species in Panna Tiger Reserve, Madhya Pradesh: Capture-recapture and distance sampling estimates. Technical Report, Wildlife Institute of India, Dehradun, and Panna Tiger \ldots.
175		Ramesh, T., Sridharan, N., Sankar, K., Qureshi, Q., Selvan, K. M., Gokulakkannan, N., Francis, P., Narasimmarajan, K., Jhala, Y. V., & Gopal, R. (2012). Status of large carnivores and their prey in tropical rainforests of South-western Ghats, India. Tropical Ecology, 53(2), 137–148.
331		Rao, M., Myint, T., Zaw, T., & Htun, S. (2005). Hunting patterns in tropical forests adjoining the Hkakaborazi National Park, north Myanmar. Oryx, 39(3), 292–300.
333		Rasphone, A. (2009). WCS Laos Nam Kading Camera Trap Compilation 2007-2009 [Personal communication].
334		Rasphone, A. (2011). WCS Laos Nakai Nam Thuen Camera Trap Compilation 2006-2011 [Personal communication].
177		Rasphone, A. (2017). WCS Laos NEPL Camera Trap Compilation 2009-2017 [Personal communication].
336		Rasphone, A. (2021). WCS Laos ICBF Camera Trap Compilation 2020-2021 [Personal communication].
337		Rasphone, A. (2021). WCS Laos NCNX Camera Trap Compilation 2020-2021 [Personal communication].
332		Rasphone, A., Kéry, M., Kamler, J. F., & Macdonald, D. W. (2019). Documenting the demise of tiger and leopard, and the status of other carnivores and prey, in Lao PDR’s most prized protected area: Nam Et-Phou Louey. Global Ecology and Conservation, 20, e00766.
178		Rayan, D. M., & Linkie, M. (2015). Conserving tigers in Malaysia: A science-driven approach for eliciting conservation policy change. Biological Conservation, 184, 18–26.
179		Rayan, D. M., & Mohamad, S. W. (2009). The importance of selectively logged forests for tiger Panthera tigris conservation: A population density estimate in Peninsular Malaysia. Oryx, 43(01), 48–51. https://doi.org/10.1017/S0030605308001890
180		Reddy, P. A., Kumaraguru, A., Yadav, P. R., Ramyashree, A., Bhagavatula, J., & Shivaji, S. (2011). Studies to determine presence or absence of the Indian tiger (Panthera tigris tigris) in Kawal Wildlife Sanctuary, India. EUROPEAN JOURNAL OF WILDLIFE RESEARCH, 57(3), 517–522. https://doi.org/10.1007/s10344-010-0460-3
338		Report, T., Basak, K., Nature, N., Society, W., & Iowa, N. (2015). Estimation of population trend of Lesser Cats by Camera Trap method in Buxa Tiger Reserve , West Report on Estimation of population trend of Lesser Cats by Camera Trap method in Buxa Tiger Reserve , West Bengal ( 2015 ) Implemented by : (November; p. 81). NATURE ENVIRONMENT & WILDLIFE SOCIETY (NEWS). https://doi.org/10.13140/RG.2.…
339		Rostro-García, S., Kamler, J. F., Crouthers, R., Sopheak, K., Prum, S., In, V., Pin, C., Caragiulo, A., & Macdonald, D. W. (2018). An adaptable but threatened big cat: Density, diet and prey selection of the Indochinese leopard (Panthera pardus delacouri) in eastern Cambodia. Royal Society Open Science, 5(2), 171187.
340		Rovero, F., Augugliaro, C., Havmøller, R. W., Groff, C., Zimmermann, F., Oberosler, V., & Tenan, S. (2020). Co-occurrence of snow leopard Panthera uncia, Siberian ibex Capra sibirica and livestock: Potential relationships and effects. Oryx, 54(1), 118–124. https://doi.org/10.1017/S0030605317001685
181		Roy, M., Qureshi, Q., Naha, D., Sankar, K., Gopal, R., & Jhala, Y. V. (2016). Demystifying the Sundarban tiger: Novel application of conventional population estimation methods in a unique ecosystem. Population Ecology, 58(1), 81–89.
182		Royal Manas National Park. (2017). Population Status and Density of Tigers in the Southern Belt of Royal Manas National Park (2015-2016) (p. 61). Department of Forests and Park Services.
184		Royle, J. A., Karanth, K. U., Gopalaswamy, A. M., & Kumar, N. S. (2009). Bayesian inference in camera trapping studies for a class of spatial capture-recapture models. Ecology, 90(11), 3233–3244.
183		Royle, J. A., Nichols, J. D., Karanth, K. U., & Gopalaswamy, A. M. (2009). A hierarchical model for estimating density in camera‐trap studies. Journal of Applied Ecology, 46(1), 118–127.
185		Rozhnov, V. V., Blanco, J. A. H., Lukarevskiy, V. S., Naidenko, S. V., Sorokin, P. A., Litvinov, M. N., Kotlyar, A. K., & Pavlov, D. S. (2011). Application of Satellite Collars to the Study of Home Range and Activity of the Amur Tiger (Panthera tigris altaica). 38(8), 14.
186		Rozhnov, V. V., Naidenko, S. V., Hernandez-Blaco, J. A., Chistopolova, M. D., Sorokin, P. A., Yachmennikova, A. A., Blidcheko, E. Yu., Kalinin, A. Yu., & Kastrikin, V. A. (2021). Restoration of the Amur Tiger (Panthera tigris altaica) Population in the Northwest of Its Distribution Area. Biology Bulletin, 48(8), 1401–1423.
187		Sadhu, A., Jayam, P. P. C., Qureshi, Q., Shekhawat, R. S., Sharma, S., & Jhala, Y. V. (2017). Demography of a small, isolated tiger (Panthera tigris tigris) population in a semi-arid region of western India. BMC Zoology, 2(1), 16.
189		Sanderson, E. W., Forrest, J., Loucks, C., Ginsberg, J., Dinerstein, E., Seidensticker, J., Leimgruber, P., Songer, M., Heydlauff, A., O’Brien, T., Bryja, G., Klenzendorf, S., & Wikramanayake, E. (2006). Setting priorities for the conservation and recovery of wild tigers: 2005-2015. The Technical Assessment. National Fish and Wildlife Foundation - Save the Tiger Fund, Wildlife Conservation Societ…
188		Sankar, K., Qureshi, Q., Nigam, P., Malik, P. K., Sinha, P. R., Mehrotra, R. N., Gopal, R., Bhattacharjee, S., Mondal, K., & Gupta, S. (2010). Monitoring of Reintroduced Tigers in Sariska Tiger Reserve, Western India: Preliminary Findings on Home Range, Prey Selection and Food Habits. Tropical Conservation Science, 3(3), 301–318. https://doi.org/10.1177/194008291000300305
190		Sanusi, M. A. M., Shukor, M. A., Juliana, W. A. W., & Traeholt, C. (2013). Activity pattern of selected ungulates at Krau Wildlife Reserve. AIP Conference Proceedings, 1571(1), 325–330.
192		Sarkar, M. S., Amonge, D. E., Pradhan, N., Naing, H., Huang, Z., & Lodhi, M. S. (2021). A Review of Two Decades of Conservation Efforts on Tigers, Co-Predators and Prey at the Junction of Three Global Biodiversity Hotspots in the Transboundary Far-Eastern Himalayan Landscape. Animals, 11(8), 2365. https://doi.org/10.3390/ani11082365
191		Sarkar, M. S., Segu, H., Bhaskar, J. V., Jakher, R., Mohapatra, S., Shalini, K., Shivaji, S., & Reddy, P. A. (2018). Ecological preferences of large carnivores in remote, high-altitude protected areas: Insights from Buxa Tiger Reserve, India. ORYX, 52(1), 66–77. https://doi.org/10.1017/S0030605317000060
194		Selvan, K. M., Lyngdoh, S., Habib, B., & Gopi, G. V. (2014). Population density and abundance of sympatric large carnivores in the lowland tropical evergreen forest of Indian Eastern Himalayas. Mammalian Biology, 79(4), 254–258. https://doi.org/10.1016/j.mambio.2014.03.002
193		Selvan, K. M., Veeraswami, G. G., Lyngdoh, S., Habib, B., & Hussain, S. A. (2013). Prey selection and food habits of three sympatric large carnivores in a tropical lowland forest of the Eastern Himalayan Biodiversity Hotspot. Mammalian Biology, 78(4), 296–303. https://doi.org/10.1016/j.mambio.2012.11.009
195		Sharma, R. K., Jhala, Y., Qureshi, Q., Vattakaven, J., Gopal, R., & Nayak, K. (2010). Evaluating capture–recapture population and density estimation of tigers in a population with known parameters. Animal Conservation, 13(1), 94–103.
196		Shepherd, C. R., & Magnus, N. (2004). Nowhere to Hide: The trade in the Sumatran tiger (p. 212). TRAFFIC Southeast Asia.
197		Shrestha, S., Sherpa, A. P., Lama, S., Tamang, M., & Paudel, P. K. (2021). Tigers at higher elevations outside their range: What does it mean for conservation? Eco.Mont (Journal on Protected Mountain Areas Research), 14(1), 43–46. https://doi.org/10.1553/eco.mont-14-1s43
198		Siddiqui, I., & Vasudev, D. (2017). Impending recovery of a tiger population in Telangana following increased protection. Oryx, 51(2), 203–204. https://doi.org/10.1017/S0030605317000126
200		Simcharoen, S., & Duangchantrasiri, S. (2008). Monitoring of the Leopard Population at Khao Nang Rum in Huai Kha Khaeng Wildlife Sanctuary. Thailand Journal of Forestry, 27, 68–80.
199		Simcharoen, S., Pattanavibool, A., Karanth, K. U., Nichols, J. D., & Kumar, N. S. (2007). How many tigers Panthera tigris are there in Huai Kha Khaeng Wildlife Sanctuary, Thailand? An estimate using photographic capture-recapture sampling. Oryx, 41(4), 447–453.
203		Singh, G., Velmurugan, A., & Dakhate, M. P. (2009). Geospatial approach for tiger habitat evaluation and distribution in Corbett Tiger reserve, India. Journal of the Indian Society of Remote Sensing, 37(4), 573–585. https://doi.org/10.1007/s12524-009-0052-4
342		Singh, P., & Macdonald, D. W. (2017). Populations and activity patterns of clouded leopards and marbled cats in Dampa Tiger Reserve, India. Journal of Mammalogy, 98(5), 1453–1462.
201		Singh, R., Chauhan, D., Mishra, S., Krausman, P. R., & Goyal, S. (2014). Tiger density in a tropical lowland forest in the Eastern Himalayan Mountains. SpringerPlus, 3(1), 462. https://doi.org/10.1186/2193-1801-3-462
202		Singh, R., Qureshi, Q., Sankar, K., Krausman, P. R., & Goyal, S. P. (2014). Evaluating heterogeneity of sex-specific capture probability and precision in camera-trap population estimates of tigers. Wildlife Society Bulletin, 38(4), 791–796. https://doi.org/10.1002/wsb.471
204		Siripattaranukul, K., Paglia, S., Sukmasuang, R., & Horradee, S. (2015). The Study of Diversity and Abandance of Wildlife in Chaloem Rattanakosin National ark by Camera Trapping. (การ ศึกษา ความ หลาก ชนิด และ ความ มากมาย ของ สัตว์ ป่า ใน อุทยานแห่งชาติ เฉลิม ม รัตนโกสินทร์ โดย กล้อง ดัก ถ่าย ภาพ). Journal of Wildlife in Thailand (Thailand), 22(1), 91–100.
205		Sittibal, D. (2021). Summary of ad hoc tiger observations from Thailand, 2018—2021. WCS Thailand in cooperation with government of Kingdom of Thailand.
207		Smith, J. L. D., Ahearn, S. C., & McDougal, C. (1998). Landscape Analysis of Tiger Distribution and Habitat Quality in Nepal. Conservation Biology, 12(6), 1338–1346. https://doi.org/10.1111/j.1523-1739.1998.97068.x
206		Smith, O. (2012). Population genetics and structure of the Sumatran tiger. https://doi.org/10.25560/11756
208		Soh, Y. H., Carrasco, L. R., Miquelle, D. G., Jiang, J., Yang, J., Stokes, E. J., Tang, J., Kang, A., Liu, P., & Rao, M. (2014). Spatial correlates of livestock depredation by Amur tigers in Hunchun, China: Relevance of prey density and implications for protected area management. Biological Conservation, 169, 117–127. https://doi.org/10.1016/j.biocon.2013.10.011
209		Soutyrina, S. V., Riley, M. D., Goodrich, J. M., Seryodkin, I. V., & Miquelle, D. G. (2013). A population estimate of Amur tigers using camera traps: A monograph. Sikhote-Alin State Nature Biosphere Reserve n.a. K.G. Abramov, Wildlife Conservation Society, Pacific Geographical Institute, Russian Academy of Sciences, Far Eastern Branch.
210		Steinmetz, R., Seuaturien, N., Chutipong, W., & Poonnil, B. (2009). The ecology and conservation of tigers and their prey in Kuiburi National Park, Thailand. WWF Thailand, and Department of National Parks, Wildlife and Plant Conservation, Bangkok, Thailand.
343		Stevens, K., Dehgan, A., Karlstetter, M., Rawan, F., Tawhid, M. I., Ostrowski, S., Ali, J. M., & Ali, R. (2011). Large mammals surviving conflict in the eastern forests of Afghanistan. Oryx, 45(2), 265–271. https://doi.org/10.1017/S0030605310000517
344		Subagyo, A., Supriatna, J., Andayani, N., Mardiastuti, A., & Sunarto, S. (2018). Diversity and activity pattern of wild cats in Way Kambas National Park, Sumatra, Indonesia. Life and Environmental Sciences Academics Forum, 481, 1–12. https://doi.org/10.1088/1755-1315/481/1/012005
211		Sugimoto, T., Nagata, J., Aramilev, V. V., & McCullough, D. R. (2012). Population size estimation of Amur tigers in Russian Far East using noninvasive genetic samples. Journal of Mammalogy, 93(1), 93–101. JSTOR.
345		Sukmasuang, R., Charaspet, K., Panganta, T., Pla-ard, M., Khioesree, N., & Thongbanthum, J. (2020). Diversity, abundance, activity period, and factors affecting the appearance of wildlife around the corridors between Khao Yai-Thap Lan National Parks, Thailand by camera trapping. Biodiversitas Journal of Biological Diversity, 21(5).
213		Sunarto, S., Kelly, M., Klenzendorf, S., Vaughan, M. R., Zulfahmi, Hutajulu, M. B., & Parakkasi, K. (2013). Threatened predator on the equator: Multi-point abundance estimates of the tiger Panthera tigris in central Sumatra. Oryx, 47, 211–220.
214		Sunarto. (2011). Ecology and restoration of Sumatran Tigers in Forest and Plantation Landscapes [Ph.D. dissertation, Virgina Polytechnic Institute and State University]. https://vtechworks.lib.vt.edu/bitstream/handle/10919/37392/Sunarto_S_D_2011.pdf?sequence=1
347		Suttidate, N., Steinmetz, R., Lynam, A. J., Sukmasuang, R., Ngoprasert, D., Chutipong, W., Bateman, B. L., Jenks, K. E., Baker-Whatton, M., Kitamura, S., Ziółkowska, E., & Radeloff, V. C. (2021). Habitat connectivity for endangered Indochinese tigers in Thailand. Global Ecology and Conservation, 29, e01718. https://doi.org/10.1016/j.gecco.2021.e01718
348		Suzuki, A., Thong, S., Tan, S., & Iwata, A. (2017). Camera trapping of large mammals in Chhep Wildlife Sanctuary, northern Cambodia. 13.
215		Talegaonkar, R., Upendra, D., Hushangabadkar, P., Jena, J., Dey, S., Das, T., Dhamorikar, A., Salaria, S., & Chanchani, P. (2020). The Balaghat TX2 Recovery Site: Status of Tigers and Conservation Assessment (2014-2017). WWF-India.
349		Tantipisanuh, N., Chutipong, W., Ngoprasert, D., Lynam, A. J., Steinmetz, R., Sukmasuang, R., Jenks, K. E., Grassman Jr, L. I., Cutter, P., & Kitamura, S. (2014). Recent distribution records, threats and conservation priorities of small cats in Thailand. Cat News Special, 8, 36–44.
217		Tempa, T. (2017). The Ecology of Montane Bengal Tigers (Panthera tigris tigris) in the Himalayan Kingdom of Bhutan [Ph.D.]. University of Montana.
218		Tempa, T., Hebblewhite, M., Goldberg, J. F., Norbu, N., Wangchuk, T. R., Xiao, W., & Mills, L. S. (2019). The spatial distribution and population density of tigers in mountainous terrain of Bhutan. Biological Conservation, 238, 108192.
216		Tempa, T., Norbu, N., Dhendup, P., & Nidup, T. (2011). Results from a camera trapping exercise for estimating tiger population size in the lower foothills of Royal Manas National Park. Ugyen Wangchuck Institute for Conservation and Environment and Royal Manas National Park, Royal Government of Bhutan, Lamai Gompa.
219		Thailand Wildlife Conservation Office. (2010). Thailand Tiger Action Plan, 2010-2022. Department of National Parks, Wildlife and Plant Conservation, Thailand.
220		Thapa, K., & Kelly, M. J. (2017). Density and carrying capacity in the forgotten tigerland: Tigers in the understudied Nepalese Churia. Integrative Zoology, 12(3), 211–227.
222		Thapa, K., Manandhar, S., Bista, M., Shakya, J., Sah, G., Dhakal, M., Sharma, N., Llewellyn, B., Wultsch, C., Waits, L. P., Kelly, M. J., Hero, J.-M., Hughes, J., & Karmacharya, D. (2018). Assessment of genetic diversity, population structure, and gene flow of tigers (Panthera tigris tigris) across Nepal’s Terai Arc Landscape. PLOS ONE, 13(3). https://doi.org/10.1371/journal.pone.0193495
221		Thapa, K., Wikramanayake, E., Malla, S., Acharya, K. P., Lamichhane, B. R., Subedi, N., Pokharel, C. P., Thapa, G. J., Dhakal, M., Bista, A., Borah, J., Gupta, M., Maurya, K. K., Gurung, G. S., Jnawali, S. R., Pradhan, N. M. B., Bhata, S. R., Koirala, S., Ghose, D., & Vattakaven, J. (2017). Tigers in the Terai: Strong evidence for meta-population dynamics contributing to tiger recovery and conser…
350		Thaung, R., Muñoz, V. H., Holden, J., Willcox, D., & Souter, N. J. (2018). The Vulnerable fishing cat Prionailurus viverrinus and other globally threatened species in Cambodia’s coastal mangroves. Oryx, 52(4), 636–640.
223		Thinh, V. N., Khanh, L. Q., & Tuoc, D. (2002). The Tiger (Panthera tigris) Ecology in Bach Ma National Park (p. 47). Bach Ma National Park, Vietnam.
224		Thinley, P., & Curtis, P. D. (2015). Estimating wild tiger (Panthera tigris Linnaeus) abundance and density using a spatially-explicit capture-recapture model in Jigme Dorji National Park, Bhutan. Bhutan J. Nat. Resour. Dev. Http://Dx. Doi. Org/10.17102/Cnr.
225		Thinley, P., Dendup, T., Rajaratnam, R., Vernes, K., Tempa, K., Chophel, T., & Norbu, L. (2020). Tiger reappearance in Bhutan’s Bumdeling Wildlife Sanctuary: A case for maintaining effective corridors and metapopulations. Animal Conservation.
351		Tilker, A., Nguyen, A., Abrams, J. F., Bhagwat, T., Le, M., Van Nguyen, T., Nguyen, A. T., Niedballa, J., Sollmann, R., & Wilting, A. (2018). A little-known endemic caught in the South-east Asian extinction crisis: The Annamite striped rabbit Nesolagus timminsi. Oryx, 1–10.
226		Tilson, R., Defu, H., Muntifering, J., & Nyhus, P. (2004). Dramatic decline of wild South China tigers Panthera tigris amoyensis: Field survey of priority tiger reserves. ORYX, 38(1), 40–47. https://doi.org/10.1017/S0030605304000079
353		Venkatesh, A., Sridharan, N., Packiavathi, A. J., & Selvan, M. (2017). Abundance of Large Carnivore and its Prey Species after Removal of Cattle Grazing in Mundanthurai Plateau of Kalakad-Mundanthurai Tiger Reserve, Tamil Nadu, India. Journal of Biodiversity and Endangered Species, 5(1), 1000178. https://doi.org/10.4172/2332-2543.1000178
227		Verma, D., Rajput, A., Majunder, A., & Ali, Z. (2017). Sanjay Tiger Reserve: Status of Tigers and Prey, 2016.
228		Vinitpornsawan, S. (2013). Population and spatial ecology of Tigers and Leopards relative to prey availability and human activity in Thung Yai Naresuan (East) Wildlife Sanctuary, Thailand. University of Massachusetts Amherst.
354		Vongkhamheng, C., & Duckworth, W. J. (2016). A Biodiversity Reconnaissance of a Candidate Offset Area for the Nam Ngiep 1 Hydropower Project in the Nammouane Area, Bolikhamxay Province. Wildlife Conservation Society.
229		Wahab, A. Z. A., Siong, B. L. M., Sharma, D. S. K., & Jayasilan, M. A. (2006). Tiger Ecology Study in FELDA Jerangau Barat, Peninsular Malaysia. https://docplayer.net/40388004-Tiger-ecology-study-in-felda-jerangau-barat-peninsular-malaysia.html
230		Walston, J., Robinson, J. G., Bennett, E. L., Breitenmoser, U., da Fonseca, G. A. B., Goodrich, J., Gumal, M., Hunter, L., Johnson, A., Karanth, K. U., Leader-Williams, N., MacKinnon, K., Miquelle, D., Pattanavibool, A., Poole, C., Rabinowitz, A., Smith, J. L. D., Stokes, E. J., Stuart, S. N., … Wibisono, H. (2010). Bringing the Tiger Back from the Brink—The Six Percent Solution. PLoS Biol, 8(9),…
231		Wang, S. W., & Macdonald, D. W. (2009). The use of camera traps for estimating tiger and leopard populations in the high altitude mountains of Bhutan. Biological Conservation, 142(3), 606–613.
235		Wang, T., Andrew Royle, J., Smith, J. L. D., Zou, L., Lü, X., Li, T., Yang, H., Li, Z., Feng, R., Bian, Y., Feng, L., & Ge, J. (2018). Living on the edge: Opportunities for Amur tiger recovery in China. Biological Conservation, 217, 269–279. https://doi.org/10.1016/j.biocon.2017.11.008
233		Wang, T., Feng, L., Mou, P., Ge, J., Li, C., & Smith, J. L. D. (2015). Long-distance dispersal of an Amur tiger indicates potential to restore the North-east China/Russian Tiger Landscape. Oryx, 49(4), 578–579. https://doi.org/10.1017/S0030605315000794
234		Wang, T., Feng, L., Mou, P., Wu, J., Smith, J. L. D., Xiao, W., Yang, H., Dou, H., Zhao, X., Cheng, Y., Zhou, B., Wu, H., Zhang, L., Tian, Y., Guo, Q., Kou, X., Han, X., Miquelle, D. G., Oliver, C. D., … Ge, J. (2016). Amur tigers and leopards returning to China: Direct evidence and a landscape conservation plan. LANDSCAPE ECOLOGY, 31(3), 491–503. https://doi.org/10.1007/s10980-015-0278-1
232		Wang, Y., Liu, W., Liu, F., Li, S., Zhu, X., Jiang, Z., Limin, F., & Li, B. (2019). Investigation on the population of wild Bengal tiger (Panthera tigris tigris) in Medog, Tibet. ACTA THERIOLOGICA SINICA, 39(5), 504. https://doi.org/10.16829/j.slxb.150265
236		WCS Cambodia. (2002). Cambodian Tiger Conservation Project. Save the Tiger Fund. A special project of the National Fish and Wildlife Foundation in partnership with the ExxonMobil Corporation. (Report: 1-56). Wildlife Conservation Society (WCS) Cambodia Program.
237		Wegge, P., Odden, M., Pokharel, C. P., & Storaas, T. (2009). Predator-prey relationships and responses of ungulates and their predators to the establishment of protected areas: A case study of tigers, leopards and their prey in Bardia National Park, Nepal. Biological Conservation, 142(1), 189–202.
356		Wei, C. T. K., Moore, J., bin Saaban, S., Campos-Arceiz, A., & Macdonald, D. W. (2015). The discovery of two spotted leopards (Panthera pardus) in Peninsular Malaysia. Tropical Conservation Science, 8(3), 732–737.
357		Weiskopf, S. R., McCarthy, K. P., Tessler, M., Rahman, H. A., McCarthy, J. L., Hersch, R., Faisal, M. M., & Siddall, M. E. (2018). Using terrestrial haematophagous leeches to enhance tropical biodiversity monitoring programmes in Bangladesh. Journal of Applied Ecology, 55(4), 2071–2081.
238		Wibisono, H. T. (2021). An Island-Wide Status of Sumatran Tiger (Panthera Tigris Sumatrae) and Principal Prey in Sumatra, Indonesia [Ph.D., University of Delaware]. http://www.proquest.com/pqdtglobal/docview/2570180470/abstract/CED9C5931F654EF0PQ/1
239		Wibisono, H. T., & Pusparini, W. (2010). Sumatran tiger (Panthera tigris sumatrae): A review of conservation status. Integrative Zoology, 5(4), 313–323. https://doi.org/10.1111/j.1749-4877.2010.00219.x
240		Wibisono, H. T., Figel, J. J., Arif, S. M., Ario, A., & Lubis, A. H. (2009). Assessing the Sumatran tiger Panthera tigris sumatrae population in Batang Gadis National Park, a new protected area in Indonesia. Oryx, 43(4), 634–638.
242		Wibisono, H. T., Linkie, M., Guillera-Arroita, G., Smith, J. A., Sunarto, Pusparini, W., Asriadi, Baroto, P., Brickle, N., Dinata, Y., Gemita, E., Gunaryadi, D., Haidir, I. A., Herwansyah, Karina, I., Kiswayadi, D., Kristiantono, D., Kurniawan, H., Lahoz-Monfort, J. J., … Zulfahmi. (2011). Population Status of a Cryptic Top Predator: An Island-Wide Assessment of Tigers in Sumatran Rainforests. PL…
244		Widodo, F. A., Hanny, S., Utomo, E. H. S., Zulfahmi, Z., Kusdianto, K., Septayuda, E., Tugio, T., Panjaitan, E., Subali, L., Suprianto, A., Parakkasi, K., Fadhil, N., Sukmantoro, W., Budianti, I., & Sunarto, S. (2017). Tigers and Their Prey in Bukit Rimbang Bukit Baling: Abundance baseline for effective wildlife reserve management. Journal of Forest Science, 11(2), 118–129. https://doi.org/10.221…
243		Widodo, F. A., Imron, M. A., Sunarto, S., & Giordano, A. J. (2022). Carnivores and their prey in Sumatra: Occupancy and activity in human-dominated forests. PLOS ONE, 17(3), e0265440. https://doi.org/10.1371/journal.pone.0265440
245		Wildlife Conservation Society, World Wildlife Fund, & Department of National Parks, Wildlife and Plant Conservation, Thailand. (2013). Recovery of Tigers & Other Threatened Wildlife in The Western Forest Complex 2005—2013 (p. 44). Wildlife Conservation Society.
358		Willcox, D. H. A., Tran, Q. P., Hoang, M. D., & Nguyen, T. T. A. (2014). The decline of non-Panthera cat species in Vietnam. Cat News, Special, 8, 53–61.
359		Willcox, D., Phuong, T. Q., Van Thai, N., Van Nhuan, N., Kempinski, J., Roberton, S., Willcox, D., & Schipper, J. (2015). The conservation status of small carnivores in the Ke Go–Khe Net Lowlands, Central Vietnam. Small Carnivore Conservation, 52(5), 73.
360		WWF. (2019). WWF Laos Nam Poui NPA Camera Trap Compilation 2016-2019. WWF.
246		WWF-Asia Pacific. (2022). In photos: Where the world has lost tigers. Exposure. https://wwfasiapacific.exposure.co/in-photos-where-the-world-has-lost-tigers
247		WWF-Bhutan. (2001). Tiger Conservation Enhancement in Bhutan (p. 15). WWF-Bhutan.
248		Xiao, W., Feng, L., Mou, P., Miquelle, D. G., Hebblewhite, M., Goldberg, J. F., Robinson, H. S., Zhao, X., Zhou, B., & Wang, T. (2016). Estimating abundance and density of Amur tigers along the Sino–Russian border. Integrative Zoology, 11(4), 322–332.
249		Yang, S., Jiang, J., Wu, Z., Li, T., Yang, X., Han, X., Miquelle, D. G., Pikunov, D. G., Dunishenko, Y. M., & Nikolaev, I. G. (1998). Report on the Sino-Russian joint survey of Far Eastern leopards and Siberian tigers and their habitat in the Sino-Russian boundary area, eastern Jilin Province, China, winter 1998 (p. 42). UNDP and Wildlife Conservation Society. http://www.catsg.org/fileadmin/files…
361		Yongdrup, P., Sherub, K., Tshering, U., Chaida, L., & Chaten. (2019). Abundance and Distribution of Asiatic Golden Cat (Catopuma temminckii Vigors and Horsfield) and Clouded Leopard (Neofelis nebulosa Griffith) in Jomotsangkha Wildlife Sanctuary, Bhutan. Bhutan Journal of Natural Resources & Development, 6(1), 19–26.
250		Yumnam, B., Jhala, Y. V., Qureshi, Q., Maldonado, J. E., Gopal, R., Saini, S., Srinivas, Y., & Fleischer, R. C. (2014). Prioritizing Tiger Conservation through Landscape Genetics and Habitat Linkages. PLOS ONE, 9(11), e111207. https://doi.org/10.1371/journal.pone.0111207
362		Zakir, T., Debbarma, H., & Akash, M. (2020). Dhole Cuon alpinus in Satchari National Park: On the first verifiable evidence from northeast Bangladesh. Mammalia, 84(6), 587–593.
363		Zaw, T., Myint, T., Htun, S., Po, S. H. T., Latt, K. T., Maung, M., & Lynam, A. J. (2014). Status and distribution of smaller cats in Myanmar. Cat News, 8, 24–30.
251		Zhang, E., Schaller, G. B., & Zhi, L. (2000). Tigers in Tibet. Cat News, 33, 5–6.
252		Zoological Society of London. (2017). Amur Tiger Conservation in Lazovsky Zapovednik and Adjacent Areas, January-December 2017 (p. 23). Zoological Society of London.
253		Zoological Society of London. (2019). Securing the future of Nepal’s tigers: Strengthening tiger protection and monitoring in Parsa National Park. https://conservewildcats.org/wp-content/uploads/sites/5/2019/05/ZSLNepalFinalReport18_forweb.pdf
