# Supplementary material for: Range-wide trends in tiger conservation landscapes, 2001 - 2020
Source: Frontiers journal article supplement (doi:10.3389/fcosc.2023.1191280), 2023-12-08
Supplement: Table_3.XLSX [file Table_3.XLSX]

## Sheet: revise hist range ecoregions
Ecoregions	Core patch size for 5 tigers (km2)	Source
Brahmaputra Valley semi-evergreen forests	29.7619	Harihar et al. (in review)
Central Deccan Plateau dry deciduous forests	133.33	Harihar et al. (in review)
East Deccan dry-evergreen forests	143.885	Harihar et al. (in review)
Eastern Himalayan alpine shrub and meadows	239.234	Harihar et al. (in review)
Eastern Himalayan broadleaf forests	515.464	Harihar et al. (in review)
Eastern Himalayan subalpine conifer forests	2083.33	Harihar et al. (in review)
Helanshan montane conifer forests	2083.33	Harihar et al. (in review)
Hengduan Mountains subalpine conifer forests	2083.33	Harihar et al. (in review)
Himalayan subtropical broadleaf forests	263.852	Harihar et al. (in review)
Himalayan subtropical pine forests	111.359	Harihar et al. (in review)
Kayah-Karen montane rain forests	308.642	Harihar et al. (in review)
Khathiar-Gir dry deciduous forests	78.125	Harihar et al. (in review)
Manchurian mixed forests	1851.85	Harihar et al. (in review)
Mizoram-Manipur-Kachin rain forests	617.284	Harihar et al. (in review)
Narmada Valley dry deciduous forests	218.341	Harihar et al. (in review)
North Deccan dry deciduous forests	133.333	Harihar et al. (in review)
North Western Ghats moist deciduous forests	213.675	Harihar et al. (in review)
North Western Ghats montane rain forests	2500	Harihar et al. (in review)
Northeast Himalayan subalpine conifer forests	2083.33	Harihar et al. (in review)
Northeast India-Myanmar pine forests	133.333	Harihar et al. (in review)
Northern Indochina subtropical forests	1315.79	Harihar et al. (in review)
Northern Triangle subtropical forests	1818.18	Harihar et al. (in review)
Nujiang Langcang Gorge alpine conifer and mixed forests	2083.33	Harihar et al. (in review)
Peninsular Malaysian montane rain forests	819.672	Harihar et al. (in review)
Peninsular Malaysian rain forests	352.113	Harihar et al. (in review)
Qionglai-Minshan conifer forests	2083.33	Harihar et al. (in review)
South Deccan Plateau dry deciduous forests	757.576	Harihar et al. (in review)
South Western Ghats moist deciduous forests	57.4713	Harihar et al. (in review)
South Western Ghats montane rain forests	227.273	Harihar et al. (in review)
Southeast Indochina dry evergreen forests	862.069	Harihar et al. (in review)
Southern Vietnam lowland dry forests	133.333	Harihar et al. (in review)
Sumatran lowland rain forests	769.231	Harihar et al. (in review)
Sumatran montane rain forests	370.37	Harihar et al. (in review)
Sumatran peat swamp forests	1282.05	Harihar et al. (in review)
Sumatran tropical pine forests	333.333	Harihar et al. (in review)
Sundarbans mangroves	156.006	Harihar et al. (in review)
Tenasserim-South Thailand semi-evergreen rain forests	666.667	Harihar et al. (in review)
Terai-Duar savanna and grasslands	234.742	Harihar et al. (in review)
Tian Shan montane conifer forests	2083.33	Harihar et al. (in review)
Upper Gangetic Plains moist deciduous forests	130.719	Harihar et al. (in review)
Ussuri broadleaf and mixed forests	1315.79	Harihar et al. (in review)
Central Indochina dry forests	133.33	Harihar et al. (in review.); use value for Central Deccan plateau dry forest
Chhota-Nagpur dry deciduous forests	133.33	Harihar et al. (in review.); use value for Central Deccan plateau dry forest
Deccan thorn scrub forests	133.333	Harihar et al. (in review.); use value for Central Deccan plateau dry forest
Irrawaddy dry forests	133.333	Harihar et al. (in review.); use value for Central Deccan plateau dry forest
East Deccan moist deciduous forests	213.675	Harihar et al. (in review.); use value for Northwestern Ghats moist deciduous forest
Indochina mangroves	155.763	Harihar et al. (in review.); use value for Sundarban Mangroves
Myanmar Coast mangroves	155.763	Harihar et al. (in review.); use value for Sundarban Mangroves
Sunda Shelf mangroves	155.763	Harihar et al. (in review.); use value for Sundarban Mangroves
Alai-Western Tian Shan steppe	250	Sanderson et al. (2006)
Alashan Plateau semi-desert	250	Sanderson et al. (2006)
Aravalli west thorn scrub forests	250	Sanderson et al. (2006)
Azerbaijan shrub desert and steppe	250	Sanderson et al. (2006)
Badghyz and Karabil semi-desert	250	Sanderson et al. (2006)
Cardamom Mountains rain forests	250	Sanderson et al. (2006)
Caspian Hyrcanian mixed forests	400	Sanderson et al. (2006)
Caspian lowland desert	250	Sanderson et al. (2006)
Caucasus mixed forests	250	Sanderson et al. (2006)
Central Asian northern desert	250	Sanderson et al. (2006)
Central Asian riparian woodlands	250	Sanderson et al. (2006)
Central Asian southern desert	250	Sanderson et al. (2006)
Central China Loess Plateau mixed forests	400	Sanderson et al. (2006)
Central Korean deciduous forests	625	Sanderson et al. (2006)
Changbai Mountains mixed forests	625	Sanderson et al. (2006)
Changjiang Plain evergreen forests	625	Sanderson et al. (2006)
Chao Phraya freshwater swamp forests	250	Sanderson et al. (2006)
Chao Phraya lowland moist deciduous forests	250	Sanderson et al. (2006)
Chin Hills-Arakan Yoma montane forests	250	Sanderson et al. (2006)
Daba Mountains evergreen forests	625	Sanderson et al. (2006)
Eastern Anatolian montane steppe	625	Sanderson et al. (2006)
Eastern Java-Bali montane rain forests	250	Sanderson et al. (2006)
Eastern Java-Bali rain forests	250	Sanderson et al. (2006)
Eastern Mediterranean conifer-broadleaf forests	625	Sanderson et al. (2006)
Elburz Range forest steppe	625	Sanderson et al. (2006)
Gissaro-Alai open woodlands	625	Sanderson et al. (2006)
Godavari-Krishna mangroves	250	Sanderson et al. (2006)
Guizhou Plateau broadleaf and mixed forests	625	Sanderson et al. (2006)
Hainan Island monsoon rain forests	250	Sanderson et al. (2006)
Huang He Plain mixed forests	625	Sanderson et al. (2006)
Irrawaddy freshwater swamp forests	250	Sanderson et al. (2006)
Irrawaddy moist deciduous forests	250	Sanderson et al. (2006)
Jian Nan subtropical evergreen forests	250	Sanderson et al. (2006)
Kopet Dag semi-desert	250	Sanderson et al. (2006)
Kopet Dag woodlands and forest steppe	250	Sanderson et al. (2006)
Lower Gangetic Plains moist deciduous forests	250	Sanderson et al. (2006)
Luang Prabang montane rain forests	250	Sanderson et al. (2006)
Malabar Coast moist forests	250	Sanderson et al. (2006)
Meghalaya subtropical forests	250	Sanderson et al. (2006)
Mongolian-Manchurian grassland	625	Sanderson et al. (2006)
Myanmar coastal rain forests	250	Sanderson et al. (2006)
Northeast China Plain deciduous forests	625	Sanderson et al. (2006)
Northern Annamites rain forests	250	Sanderson et al. (2006)
Northern Khorat Plateau moist deciduous forests	250	Sanderson et al. (2006)
Northern Thailand-Laos moist deciduous forests	250	Sanderson et al. (2006)
Northern Triangle temperate forests	625	Sanderson et al. (2006)
Northern Vietnam lowland rain forests	250	Sanderson et al. (2006)
Ordos Plateau steppe	250	Sanderson et al. (2006)
Orissa semi-evergreen forests	250	Sanderson et al. (2006)
Peninsular Malaysian peat swamp forests	250	Sanderson et al. (2006)
Qin Ling Mountains deciduous forests	625	Sanderson et al. (2006)
Red River freshwater swamp forests	250	Sanderson et al. (2006)
Sichuan Basin evergreen broadleaf forests	625	Sanderson et al. (2006)
South China-Vietnam subtropical evergreen forests	250	Sanderson et al. (2006)
Southeast Tibet shrublands and meadows	250	Sanderson et al. (2006)
Southern Annamites montane rain forests	250	Sanderson et al. (2006)
Southern Korea evergreen forests	625	Sanderson et al. (2006)
Suiphun-Khanka meadows and forest meadows	625	Sanderson et al. (2006)
Sumatran freshwater swamp forests	250	Sanderson et al. (2006)
Sundarbans freshwater swamp forests	250	Sanderson et al. (2006)
Taklimakan desert	250	Sanderson et al. (2006)
Tian Shan foothill arid steppe	625	Sanderson et al. (2006)
Tian Shan montane steppe and meadows	250	Sanderson et al. (2006)
Tonle Sap freshwater swamp forests	250	Sanderson et al. (2006)
Tonle Sap-Mekong peat swamp forests	250	Sanderson et al. (2006)
Western Himalayan broadleaf forests	625	Sanderson et al. (2006)
Western Java montane rain forests	250	Sanderson et al. (2006)
Western Java rain forests	250	Sanderson et al. (2006)
Yunnan Plateau subtropical evergreen forests	250	Sanderson et al. (2006)
Zagros Mountains forest steppe	625	Sanderson et al. (2006)

## Sheet: parameters
Density	tigers / 100 km2
Number of tigers for core patch size	5 tigers
Stepping stone size	0.1 of core patch size

## Sheet: biome_density - patch sizes
system:index	BIOME_NAME	BIOME_NUM	ECO_BIOME_	ECO_ID	ECO_NAME	MED_DENSITY_BIOME	MED_DENSITY_ECO	MED_DENSITY_ECO_BIOME	OBJECTID	REALM	.geo	Core_MED_DENSITY_BIOME	Core_MED_DENSITY_ECO	Core_MED_DENSITY_ECO_BIOME	ss_MED_DENSITY_BIOME	ss_MED_DENSITY_ECO	ss_MED_DENSITY_ECO_BIOME
0000000000000000020c	Tropical & Subtropical Moist Broadleaf Forests	1	IN01	222	Brahmaputra Valley semi-evergreen forests	2.51	16.8	2.51	81	Indomalayan	{"type":"MultiPoint","coordinates":[]}	199.203	29.7619	199.203	19.9203	2.97619	19.9203
246	Tropical & Subtropical Dry Broadleaf Forests	2	IN02	290	Central Deccan Plateau dry deciduous forests	2.48	3.745	2.48	138	Indomalayan	{"type":"MultiPoint","coordinates":[]}	201.613	133.511	201.613	20.1613	13.3511	20.1613
249	Tropical & Subtropical Dry Broadleaf Forests	2	IN02	293	East Deccan dry-evergreen forests	2.48	3.475	2.48	216	Indomalayan	{"type":"MultiPoint","coordinates":[]}	201.613	143.885	201.613	20.1613	14.3885	20.1613
000000000000000000c5	Montane Grasslands & Shrublands	10	PA10	751	Eastern Himalayan alpine shrub and meadows	2.09	2.09	2.09	237	Palearctic	{"type":"MultiPoint","coordinates":[]}	239.234	239.234	239.234	23.9234	23.9234	23.9234
256	Temperate Broadleaf & Mixed Forests	4	IN04	306	Eastern Himalayan broadleaf forests	0.38	0.97	0.9	238	Indomalayan	{"type":"MultiPoint","coordinates":[]}	1315.79	515.464	555.556	131.579	51.5464	55.5556
259	Temperate Conifer Forests	5	IN05	309	Eastern Himalayan subalpine conifer forests	0.24	0.24	0.24	239	Indomalayan	{"type":"MultiPoint","coordinates":[]}	2083.33	2083.33	2083.33	208.333	208.333	208.333
216	Tropical & Subtropical Moist Broadleaf Forests	1	IN01	233	Himalayan subtropical broadleaf forests	2.51	1.895	2.51	314	Indomalayan	{"type":"MultiPoint","coordinates":[]}	199.203	263.852	199.203	19.9203	26.3852	19.9203
252	Tropical & Subtropical Coniferous Forests	3	IN03	302	Himalayan subtropical pine forests	2.48	4.49	2.48	315	Indomalayan	{"type":"MultiPoint","coordinates":[]}	201.613	111.359	201.613	20.1613	11.1359	20.1613
219	Tropical & Subtropical Moist Broadleaf Forests	1	IN01	237	Kayah-Karen montane rain forests	2.51	1.62	2.51	366	Indomalayan	{"type":"MultiPoint","coordinates":[]}	199.203	308.642	199.203	19.9203	30.8642	19.9203
0000000000000000024b	Tropical & Subtropical Dry Broadleaf Forests	2	IN02	295	Khathiar-Gir dry deciduous forests	2.48	6.4	2.48	374	Indomalayan	{"type":"MultiPoint","coordinates":[]}	201.613	78.125	201.613	20.1613	7.8125	20.1613
73	Temperate Broadleaf & Mixed Forests	4	PA04	669	Manchurian mixed forests	0.38	0.27	0.38	416	Palearctic	{"type":"MultiPoint","coordinates":[]}	1315.79	1851.85	1315.79	131.579	185.185	131.579
224	Tropical & Subtropical Moist Broadleaf Forests	1	IN01	249	Mizoram-Manipur-Kachin rain forests	2.51	0.81	2.51	448	Indomalayan	{"type":"MultiPoint","coordinates":[]}	199.203	617.284	199.203	19.9203	61.7284	19.9203
0000000000000000024c	Tropical & Subtropical Dry Broadleaf Forests	2	IN02	296	Narmada Valley dry deciduous forests	2.48	2.29	2.48	467	Indomalayan	{"type":"MultiPoint","coordinates":[]}	201.613	218.341	201.613	20.1613	21.8341	20.1613
203	Tropical & Subtropical Moist Broadleaf Forests	1	IN01	253	North Western Ghats moist deciduous forests	2.51	2.34	2.51	494	Indomalayan	{"type":"MultiPoint","coordinates":[]}	199.203	213.675	199.203	19.9203	21.3675	19.9203
228	Tropical & Subtropical Moist Broadleaf Forests	1	IN01	254	North Western Ghats montane rain forests	2.51	0.2	2.51	495	Indomalayan	{"type":"MultiPoint","coordinates":[]}	199.203	2500	199.203	19.9203	250	19.9203
0000000000000000022a	Tropical & Subtropical Moist Broadleaf Forests	1	IN01	256	Northern Indochina subtropical forests	2.51	0.38	2.51	513	Indomalayan	{"type":"MultiPoint","coordinates":[]}	199.203	1315.79	199.203	19.9203	131.579	19.9203
0000000000000000022b	Tropical & Subtropical Moist Broadleaf Forests	1	IN01	259	Northern Triangle subtropical forests	2.51	0.275	2.51	522	Indomalayan	{"type":"MultiPoint","coordinates":[]}	199.203	1818.18	199.203	19.9203	181.818	19.9203
0000000000000000022e	Tropical & Subtropical Moist Broadleaf Forests	1	IN01	263	Peninsular Malaysian montane rain forests	2.51	0.61	2.51	563	Indomalayan	{"type":"MultiPoint","coordinates":[]}	199.203	819.672	199.203	19.9203	81.9672	19.9203
230	Tropical & Subtropical Moist Broadleaf Forests	1	IN01	265	Peninsular Malaysian rain forests	2.51	1.42	2.51	565	Indomalayan	{"type":"MultiPoint","coordinates":[]}	199.203	352.113	199.203	19.9203	35.2113	19.9203
0000000000000000024e	Tropical & Subtropical Dry Broadleaf Forests	2	IN02	298	South Deccan Plateau dry deciduous forests	2.48	0.66	2.48	651	Indomalayan	{"type":"MultiPoint","coordinates":[]}	201.613	757.576	201.613	20.1613	75.7576	20.1613
000000000000000001ff	Tropical & Subtropical Moist Broadleaf Forests	1	IN01	270	South Western Ghats moist deciduous forests	2.51	8.7	2.51	660	Indomalayan	{"type":"MultiPoint","coordinates":[]}	199.203	57.4713	199.203	19.9203	5.74713	19.9203
235	Tropical & Subtropical Moist Broadleaf Forests	1	IN01	271	South Western Ghats montane rain forests	2.51	2.2	2.51	661	Indomalayan	{"type":"MultiPoint","coordinates":[]}	199.203	227.273	199.203	19.9203	22.7273	19.9203
0000000000000000024f	Tropical & Subtropical Dry Broadleaf Forests	2	IN02	299	Southeast Indochina dry evergreen forests	2.48	0.58	2.48	668	Indomalayan	{"type":"MultiPoint","coordinates":[]}	201.613	862.069	201.613	20.1613	86.2069	20.1613
0000000000000000023c	Tropical & Subtropical Moist Broadleaf Forests	1	IN01	278	Sumatran lowland rain forests	2.51	0.65	2.51	709	Indomalayan	{"type":"MultiPoint","coordinates":[]}	199.203	769.231	199.203	19.9203	76.9231	19.9203
0000000000000000023d	Tropical & Subtropical Moist Broadleaf Forests	1	IN01	279	Sumatran montane rain forests	2.51	1.35	2.51	710	Indomalayan	{"type":"MultiPoint","coordinates":[]}	199.203	370.37	199.203	19.9203	37.037	19.9203
0000000000000000023e	Tropical & Subtropical Moist Broadleaf Forests	1	IN01	280	Sumatran peat swamp forests	2.51	0.39	2.51	711	Indomalayan	{"type":"MultiPoint","coordinates":[]}	199.203	1282.05	199.203	19.9203	128.205	19.9203
255	Tropical & Subtropical Coniferous Forests	3	IN03	305	Sumatran tropical pine forests	2.48	1.5	2.48	712	Indomalayan	{"type":"MultiPoint","coordinates":[]}	201.613	333.333	201.613	20.1613	33.3333	20.1613
267	Mangroves	14	IN14	323	Sundarbans mangroves	3.2	3.205	3.205	717	Indomalayan	{"type":"MultiPoint","coordinates":[]}	156.25	156.006	156.006	15.625	15.6006	15.6006
207	Tropical & Subtropical Moist Broadleaf Forests	1	IN01	284	Tenasserim-South Thailand semi-evergreen rain forests	2.51	0.75	2.51	733	Indomalayan	{"type":"MultiPoint","coordinates":[]}	199.203	666.667	199.203	19.9203	66.6667	19.9203
0000000000000000025b	Tropical & Subtropical Grasslands, Savannas & Shrublands	7	IN07	311	Terai-Duar savanna and grasslands	2.13	2.13	2.13	734	Indomalayan	{"type":"MultiPoint","coordinates":[]}	234.742	234.742	234.742	23.4742	23.4742	23.4742
200	Tropical & Subtropical Moist Broadleaf Forests	1	IN01	287	Upper Gangetic Plains moist deciduous forests	2.51	3.825	2.51	763	Indomalayan	{"type":"MultiPoint","coordinates":[]}	199.203	130.719	199.203	19.9203	13.0719	19.9203
83	Temperate Broadleaf & Mixed Forests	4	PA04	685	Ussuri broadleaf and mixed forests	0.38	0.38	0.38	767	Palearctic	{"type":"MultiPoint","coordinates":[]}	1315.79	1315.79	1315.79	131.579	131.579	131.579
0000000000000000009c	Boreal Forests/Taiga	6	PA06	710	East Siberian taiga	0	0	0	220	Palearctic	{"type":"MultiPoint","coordinates":[]}	0	0	0	0	0	0
0000000000000000009d	Boreal Forests/Taiga	6	PA06	711	Iceland boreal birch forests and alpine tundra	0	0	0	331	Palearctic	{"type":"MultiPoint","coordinates":[]}	0	0	0	0	0	0
0000000000000000009e	Boreal Forests/Taiga	6	PA06	712	Kamchatka taiga	0	0	0	363	Palearctic	{"type":"MultiPoint","coordinates":[]}	0	0	0	0	0	0
0000000000000000009f	Boreal Forests/Taiga	6	PA06	713	Kamchatka-Kurile meadows and sparse forests	0	0	0	362	Palearctic	{"type":"MultiPoint","coordinates":[]}	0	0	0	0	0	0
000000000000000000a0	Boreal Forests/Taiga	6	PA06	714	Northeast Siberian taiga	0	0	0	499	Palearctic	{"type":"MultiPoint","coordinates":[]}	0	0	0	0	0	0
000000000000000000a1	Boreal Forests/Taiga	6	PA06	715	Okhotsk-Manchurian taiga	0	0	0	541	Palearctic	{"type":"MultiPoint","coordinates":[]}	0	0	0	0	0	0
000000000000000000a2	Boreal Forests/Taiga	6	PA06	716	Sakhalin Island taiga	0	0	0	603	Palearctic	{"type":"MultiPoint","coordinates":[]}	0	0	0	0	0	0
000000000000000000a3	Boreal Forests/Taiga	6	PA06	717	Scandinavian and Russian taiga	0	0	0	615	Palearctic	{"type":"MultiPoint","coordinates":[]}	0	0	0	0	0	0
000000000000000000a4	Boreal Forests/Taiga	6	PA06	718	Trans-Baikal conifer forests	0	0	0	750	Palearctic	{"type":"MultiPoint","coordinates":[]}	0	0	0	0	0	0
000000000000000000a5	Boreal Forests/Taiga	6	PA06	719	Urals montane forest and taiga	0	0	0	765	Palearctic	{"type":"MultiPoint","coordinates":[]}	0	0	0	0	0	0
000000000000000000a6	Boreal Forests/Taiga	6	PA06	720	West Siberian taiga	0	0	0	781	Palearctic	{"type":"MultiPoint","coordinates":[]}	0	0	0	0	0	0
296	Boreal Forests/Taiga	6	NE06	369	Alaska Peninsula montane taiga	0	0	0	11	Nearctic	{"type":"MultiPoint","coordinates":[]}	0	0	0	0	0	0
297	Boreal Forests/Taiga	6	NE06	370	Central Canadian Shield forests	0	0	0	135	Nearctic	{"type":"MultiPoint","coordinates":[]}	0	0	0	0	0	0
298	Boreal Forests/Taiga	6	NE06	371	Cook Inlet taiga	0	0	0	177	Nearctic	{"type":"MultiPoint","coordinates":[]}	0	0	0	0	0	0
299	Boreal Forests/Taiga	6	NE06	372	Copper Plateau taiga	0	0	0	180	Nearctic	{"type":"MultiPoint","coordinates":[]}	0	0	0	0	0	0
0000000000000000029a	Boreal Forests/Taiga	6	NE06	373	Eastern Canadian forests	0	0	0	227	Nearctic	{"type":"MultiPoint","coordinates":[]}	0	0	0	0	0	0
0000000000000000029b	Boreal Forests/Taiga	6	NE06	374	Eastern Canadian Shield taiga	0	0	0	228	Nearctic	{"type":"MultiPoint","coordinates":[]}	0	0	0	0	0	0
0000000000000000029c	Boreal Forests/Taiga	6	NE06	375	Interior Alaska-Yukon lowland taiga	0	0	0	337	Nearctic	{"type":"MultiPoint","coordinates":[]}	0	0	0	0	0	0
0000000000000000029d	Boreal Forests/Taiga	6	NE06	376	Mid-Canada Boreal Plains forests	0	0	0	438	Nearctic	{"type":"MultiPoint","coordinates":[]}	0	0	0	0	0	0
0000000000000000029e	Boreal Forests/Taiga	6	NE06	377	Midwest Canadian Shield forests	0	0	0	441	Nearctic	{"type":"MultiPoint","coordinates":[]}	0	0	0	0	0	0
0000000000000000029f	Boreal Forests/Taiga	6	NE06	378	Muskwa-Slave Lake taiga	0	0	0	457	Nearctic	{"type":"MultiPoint","coordinates":[]}	0	0	0	0	0	0
000000000000000002a0	Boreal Forests/Taiga	6	NE06	379	Northern Canadian Shield taiga	0	0	0	510	Nearctic	{"type":"MultiPoint","coordinates":[]}	0	0	0	0	0	0
000000000000000002a1	Boreal Forests/Taiga	6	NE06	380	Northern Cordillera forests	0	0	0	821	Nearctic	{"type":"MultiPoint","coordinates":[]}	0	0	0	0	0	0
000000000000000002a2	Boreal Forests/Taiga	6	NE06	381	Northwest Territories taiga	0	0	0	828	Nearctic	{"type":"MultiPoint","coordinates":[]}	0	0	0	0	0	0
000000000000000002a3	Boreal Forests/Taiga	6	NE06	382	Southern Hudson Bay taiga	0	0	0	680	Nearctic	{"type":"MultiPoint","coordinates":[]}	0	0	0	0	0	0
000000000000000002a4	Boreal Forests/Taiga	6	NE06	383	Watson Highlands taiga	0	0	0	778	Nearctic	{"type":"MultiPoint","coordinates":[]}	0	0	0	0	0	0
0000000000000000001c	Temperate Grasslands, Savannas & Shrublands	8	NO08	575	Espinal	0	0	0	257	Neotropic	{"type":"MultiPoint","coordinates":[]}	0	0	0	0	0	0
0000000000000000001d	Temperate Grasslands, Savannas & Shrublands	8	NO08	576	Humid Pampas	0	0	0	327	Neotropic	{"type":"MultiPoint","coordinates":[]}	0	0	0	0	0	0
0000000000000000001e	Temperate Grasslands, Savannas & Shrublands	8	NO08	577	Low Monte	0	0	0	393	Neotropic	{"type":"MultiPoint","coordinates":[]}	0	0	0	0	0	0
0000000000000000001f	Temperate Grasslands, Savannas & Shrublands	8	NO08	578	Patagonian steppe	0	0	0	561	Neotropic	{"type":"MultiPoint","coordinates":[]}	0	0	0	0	0	0
000000000000000000a7	Temperate Grasslands, Savannas & Shrublands	8	PA08	722	Al-Hajar foothill xeric woodlands and shrublands	0	0	0	6	Palearctic	{"type":"MultiPoint","coordinates":[]}	0	0	0	0	0	0
000000000000000000a8	Temperate Grasslands, Savannas & Shrublands	8	PA08	723	Al-Hajar montane woodlands and shrublands	0	0	0	7	Palearctic	{"type":"MultiPoint","coordinates":[]}	0	0	0	0	0	0
000000000000000000a9	Temperate Grasslands, Savannas & Shrublands	8	PA08	721	Alai-Western Tian Shan steppe	0	0	0	8	Palearctic	{"type":"MultiPoint","coordinates":[]}	0	0	0	0	0	0
000000000000000000aa	Temperate Grasslands, Savannas & Shrublands	8	PA08	724	Altai steppe and semi-desert	0	0	0	21	Palearctic	{"type":"MultiPoint","coordinates":[]}	0	0	0	0	0	0
000000000000000000ab	Temperate Grasslands, Savannas & Shrublands	8	PA08	725	Central Anatolian steppe	0	0	0	123	Palearctic	{"type":"MultiPoint","coordinates":[]}	0	0	0	0	0	0
000000000000000000ac	Temperate Grasslands, Savannas & Shrublands	8	PA08	726	Daurian forest steppe	0	0	0	200	Palearctic	{"type":"MultiPoint","coordinates":[]}	0	0	0	0	0	0
000000000000000000ad	Temperate Grasslands, Savannas & Shrublands	8	PA08	727	Eastern Anatolian montane steppe	0	0	0	223	Palearctic	{"type":"MultiPoint","coordinates":[]}	0	0	0	0	0	0
000000000000000000ae	Temperate Grasslands, Savannas & Shrublands	8	PA08	728	Emin Valley steppe	0	0	0	251	Palearctic	{"type":"MultiPoint","coordinates":[]}	0	0	0	0	0	0
000000000000000000af	Temperate Grasslands, Savannas & Shrublands	8	PA08	729	Faroe Islands boreal grasslands	0	0	0	265	Palearctic	{"type":"MultiPoint","coordinates":[]}	0	0	0	0	0	0
000000000000000000b0	Temperate Grasslands, Savannas & Shrublands	8	PA08	730	Gissaro-Alai open woodlands	0	0	0	278	Palearctic	{"type":"MultiPoint","coordinates":[]}	0	0	0	0	0	0
000000000000000000b1	Temperate Grasslands, Savannas & Shrublands	8	PA08	731	Kazakh forest steppe	0	0	0	367	Palearctic	{"type":"MultiPoint","coordinates":[]}	0	0	0	0	0	0
000000000000000000b2	Temperate Grasslands, Savannas & Shrublands	8	PA08	732	Kazakh steppe	0	0	0	369	Palearctic	{"type":"MultiPoint","coordinates":[]}	0	0	0	0	0	0
000000000000000000b3	Temperate Grasslands, Savannas & Shrublands	8	PA08	733	Kazakh upland steppe	0	0	0	370	Palearctic	{"type":"MultiPoint","coordinates":[]}	0	0	0	0	0	0
000000000000000000b4	Temperate Grasslands, Savannas & Shrublands	8	PA08	734	Mongolian-Manchurian grassland	0	0	0	450	Palearctic	{"type":"MultiPoint","coordinates":[]}	0	0	0	0	0	0
000000000000000000b5	Temperate Grasslands, Savannas & Shrublands	8	PA08	735	Pontic steppe	0	0	0	574	Palearctic	{"type":"MultiPoint","coordinates":[]}	0	0	0	0	0	0
000000000000000000b6	Temperate Grasslands, Savannas & Shrublands	8	PA08	736	Sayan Intermontane steppe	0	0	0	613	Palearctic	{"type":"MultiPoint","coordinates":[]}	0	0	0	0	0	0
000000000000000000b7	Temperate Grasslands, Savannas & Shrublands	8	PA08	737	Selenge-Orkhon forest steppe	0	0	0	620	Palearctic	{"type":"MultiPoint","coordinates":[]}	0	0	0	0	0	0
000000000000000000b8	Temperate Grasslands, Savannas & Shrublands	8	PA08	738	South Siberian forest steppe	0	0	0	657	Palearctic	{"type":"MultiPoint","coordinates":[]}	0	0	0	0	0	0
000000000000000000b9	Temperate Grasslands, Savannas & Shrublands	8	PA08	739	Syrian xeric grasslands and shrublands	0	0	0	718	Palearctic	{"type":"MultiPoint","coordinates":[]}	0	0	0	0	0	0
000000000000000000ba	Temperate Grasslands, Savannas & Shrublands	8	PA08	740	Tian Shan foothill arid steppe	0	0	0	737	Palearctic	{"type":"MultiPoint","coordinates":[]}	0	0	0	0	0	0
168	Temperate Grasslands, Savannas & Shrublands	8	AF08	67	Amsterdam-Saint Paul Islands temperate grasslands	0	0	0	24	Afrotropic	{"type":"MultiPoint","coordinates":[]}	0	0	0	0	0	0
169	Temperate Grasslands, Savannas & Shrublands	8	AF08	68	Tristan Da Cunha-Gough Islands shrub and grasslands	0	0	0	755	Afrotropic	{"type":"MultiPoint","coordinates":[]}	0	0	0	0	0	0
100	Temperate Grasslands, Savannas & Shrublands	8	AU08	190	Canterbury-Otago tussock grasslands	0	0	0	99	Australasia	{"type":"MultiPoint","coordinates":[]}	0	0	0	0	0	0
1000	Temperate Grasslands, Savannas & Shrublands	8	AU08	191	Eastern Australia mulga shrublands	0	0	0	225	Australasia	{"type":"MultiPoint","coordinates":[]}	0	0	0	0	0	0
10000	Temperate Grasslands, Savannas & Shrublands	8	AU08	192	Southeast Australia temperate savanna	0	0	0	663	Australasia	{"type":"MultiPoint","coordinates":[]}	0	0	0	0	0	0
000000000000000002a6	Temperate Grasslands, Savannas & Shrublands	8	NE08	385	California Central Valley grasslands	0	0	0	89	Nearctic	{"type":"MultiPoint","coordinates":[]}	0	0	0	0	0	0
000000000000000002a7	Temperate Grasslands, Savannas & Shrublands	8	NE08	386	Canadian Aspen forests and parklands	0	0	0	95	Nearctic	{"type":"MultiPoint","coordinates":[]}	0	0	0	0	0	0
000000000000000002a8	Temperate Grasslands, Savannas & Shrublands	8	NE08	388	Central Tallgrass prairie	0	0	0	151	Nearctic	{"type":"MultiPoint","coordinates":[]}	0	0	0	0	0	0
000000000000000002a9	Temperate Grasslands, Savannas & Shrublands	8	NE08	387	Central US forest-grasslands transition	0	0	0	140	Nearctic	{"type":"MultiPoint","coordinates":[]}	0	0	0	0	0	0
000000000000000002aa	Temperate Grasslands, Savannas & Shrublands	8	NE08	389	Central-Southern US mixed grasslands	0	0	0	126	Nearctic	{"type":"MultiPoint","coordinates":[]}	0	0	0	0	0	0
000000000000000002ab	Temperate Grasslands, Savannas & Shrublands	8	NE08	390	Cross-Timbers savanna-woodland	0	0	0	191	Nearctic	{"type":"MultiPoint","coordinates":[]}	0	0	0	0	0	0
000000000000000002ac	Temperate Grasslands, Savannas & Shrublands	8	NE08	391	Edwards Plateau savanna	0	0	0	246	Nearctic	{"type":"MultiPoint","coordinates":[]}	0	0	0	0	0	0
000000000000000002ad	Temperate Grasslands, Savannas & Shrublands	8	NE08	392	Flint Hills tallgrass prairie	0	0	0	271	Nearctic	{"type":"MultiPoint","coordinates":[]}	0	0	0	0	0	0
000000000000000002ae	Temperate Grasslands, Savannas & Shrublands	8	NE08	393	Mid-Atlantic US coastal savannas	0	0	0	440	Nearctic	{"type":"MultiPoint","coordinates":[]}	0	0	0	0	0	0
000000000000000002af	Temperate Grasslands, Savannas & Shrublands	8	NE08	394	Montana Valley and Foothill grasslands	0	0	0	451	Nearctic	{"type":"MultiPoint","coordinates":[]}	0	0	0	0	0	0
000000000000000002b0	Temperate Grasslands, Savannas & Shrublands	8	NE08	395	Nebraska Sand Hills mixed grasslands	0	0	0	468	Nearctic	{"type":"MultiPoint","coordinates":[]}	0	0	0	0	0	0
000000000000000002b1	Temperate Grasslands, Savannas & Shrublands	8	NE08	396	Northern Shortgrass prairie	0	0	0	518	Nearctic	{"type":"MultiPoint","coordinates":[]}	0	0	0	0	0	0
000000000000000002b2	Temperate Grasslands, Savannas & Shrublands	8	NE08	397	Northern Tallgrass prairie	0	0	0	520	Nearctic	{"type":"MultiPoint","coordinates":[]}	0	0	0	0	0	0
000000000000000002b3	Temperate Grasslands, Savannas & Shrublands	8	NE08	398	Palouse prairie	0	0	0	551	Nearctic	{"type":"MultiPoint","coordinates":[]}	0	0	0	0	0	0
000000000000000002b4	Temperate Grasslands, Savannas & Shrublands	8	NE08	399	Southeast US conifer savannas	0	0	0	666	Nearctic	{"type":"MultiPoint","coordinates":[]}	0	0	0	0	0	0
000000000000000002b5	Temperate Grasslands, Savannas & Shrublands	8	NE08	400	Southeast US mixed woodlands and savannas	0	0	0	665	Nearctic	{"type":"MultiPoint","coordinates":[]}	0	0	0	0	0	0
000000000000000002b6	Temperate Grasslands, Savannas & Shrublands	8	NE08	401	Texas blackland prairies	0	0	0	735	Nearctic	{"type":"MultiPoint","coordinates":[]}	0	0	0	0	0	0
000000000000000002b7	Temperate Grasslands, Savannas & Shrublands	8	NE08	402	Western shortgrass prairie	0	0	0	796	Nearctic	{"type":"MultiPoint","coordinates":[]}	0	0	0	0	0	0
000000000000000002b8	Temperate Grasslands, Savannas & Shrublands	8	NE08	403	Willamette Valley oak savanna	0	0	0	799	Nearctic	{"type":"MultiPoint","coordinates":[]}	0	0	0	0	0	0
20	Flooded Grasslands & Savannas	9	NO09	579	Cuban wetlands	0	0	0	196	Neotropic	{"type":"MultiPoint","coordinates":[]}	0	0	0	0	0	0
21	Flooded Grasslands & Savannas	9	NO09	580	Enriquillo wetlands	0	0	0	254	Neotropic	{"type":"MultiPoint","coordinates":[]}	0	0	0	0	0	0
22	Flooded Grasslands & Savannas	9	NO09	581	Everglades flooded grasslands	0	0	0	263	Neotropic	{"type":"MultiPoint","coordinates":[]}	0	0	0	0	0	0
23	Flooded Grasslands & Savannas	9	NO09	582	Guayaquil flooded grasslands	0	0	0	289	Neotropic	{"type":"MultiPoint","coordinates":[]}	0	0	0	0	0	0
24	Flooded Grasslands & Savannas	9	NO09	583	Orinoco wetlands	0	0	0	544	Neotropic	{"type":"MultiPoint","coordinates":[]}	0	0	0	0	0	0
25	Flooded Grasslands & Savannas	9	NO09	584	Pantanal	0	0	0	555	Neotropic	{"type":"MultiPoint","coordinates":[]}	0	0	0	0	0	0
26	Flooded Grasslands & Savannas	9	NO09	585	Paranï¿½ flooded savanna	0	0	0	559	Neotropic	{"type":"MultiPoint","coordinates":[]}	0	0	0	0	0	0
27	Flooded Grasslands & Savannas	9	NO09	586	Southern Cone Mesopotamian savanna	0	0	0	677	Neotropic	{"type":"MultiPoint","coordinates":[]}	0	0	0	0	0	0
000000000000000000bb	Flooded Grasslands & Savannas	9	PA09	741	Amur meadow steppe	0	0	0	25	Palearctic	{"type":"MultiPoint","coordinates":[]}	0	0	0	0	0	0
000000000000000000bc	Flooded Grasslands & Savannas	9	PA09	742	Bohai Sea saline meadow	0	0	0	75	Palearctic	{"type":"MultiPoint","coordinates":[]}	0	0	0	0	0	0
000000000000000000bd	Flooded Grasslands & Savannas	9	PA09	743	Nenjiang River grassland	0	0	0	471	Palearctic	{"type":"MultiPoint","coordinates":[]}	0	0	0	0	0	0
000000000000000000be	Flooded Grasslands & Savannas	9	PA09	744	Nile Delta flooded savanna	0	0	0	483	Palearctic	{"type":"MultiPoint","coordinates":[]}	0	0	0	0	0	0
000000000000000000bf	Flooded Grasslands & Savannas	9	PA09	745	Saharan halophytics	0	0	0	601	Palearctic	{"type":"MultiPoint","coordinates":[]}	0	0	0	0	0	0
000000000000000000c0	Flooded Grasslands & Savannas	9	PA09	746	Suiphun-Khanka meadows and forest meadows	0	0	0	703	Palearctic	{"type":"MultiPoint","coordinates":[]}	0	0	0	0	0	0
000000000000000000c1	Flooded Grasslands & Savannas	9	PA09	747	Tigris-Euphrates alluvial salt marsh	0	0	0	742	Palearctic	{"type":"MultiPoint","coordinates":[]}	0	0	0	0	0	0
000000000000000000c2	Flooded Grasslands & Savannas	9	PA09	748	Yellow Sea saline meadow	0	0	0	808	Palearctic	{"type":"MultiPoint","coordinates":[]}	0	0	0	0	0	0
0000000000000000016a	Flooded Grasslands & Savannas	9	AF09	69	East African halophytics	0	0	0	210	Afrotropic	{"type":"MultiPoint","coordinates":[]}	0	0	0	0	0	0
0000000000000000016b	Flooded Grasslands & Savannas	9	AF09	70	Etosha Pan halophytics	0	0	0	261	Afrotropic	{"type":"MultiPoint","coordinates":[]}	0	0	0	0	0	0
0000000000000000016c	Flooded Grasslands & Savannas	9	AF09	71	Inner Niger Delta flooded savanna	0	0	0	336	Afrotropic	{"type":"MultiPoint","coordinates":[]}	0	0	0	0	0	0
0000000000000000016d	Flooded Grasslands & Savannas	9	AF09	72	Lake Chad flooded savanna	0	0	0	385	Afrotropic	{"type":"MultiPoint","coordinates":[]}	0	0	0	0	0	0
0000000000000000016e	Flooded Grasslands & Savannas	9	AF09	73	Makgadikgadi halophytics	0	0	0	412	Afrotropic	{"type":"MultiPoint","coordinates":[]}	0	0	0	0	0	0
0000000000000000016f	Flooded Grasslands & Savannas	9	AF09	74	Sudd flooded grasslands	0	0	0	702	Afrotropic	{"type":"MultiPoint","coordinates":[]}	0	0	0	0	0	0
170	Flooded Grasslands & Savannas	9	AF09	75	Zambezian coastal flooded savanna	0	0	0	815	Afrotropic	{"type":"MultiPoint","coordinates":[]}	0	0	0	0	0	0
171	Flooded Grasslands & Savannas	9	AF09	76	Zambezian flooded grasslands	0	0	0	818	Afrotropic	{"type":"MultiPoint","coordinates":[]}	0	0	0	0	0	0
0000000000000000025c	Flooded Grasslands & Savannas	9	IN09	312	Rann of Kutch seasonal salt marsh	0	0	0	589	Indomalayan	{"type":"MultiPoint","coordinates":[]}	0	0	0	0	0	0
000000000000000000d9	Tundra	11	PA11	771	Cherskii-Kolyma mountain tundra	0	0	0	160	Palearctic	{"type":"MultiPoint","coordinates":[]}	0	0	0	0	0	0
000000000000000000da	Tundra	11	PA11	772	Chukchi Peninsula tundra	0	0	0	171	Palearctic	{"type":"MultiPoint","coordinates":[]}	0	0	0	0	0	0
000000000000000000db	Tundra	11	PA11	773	Kamchatka tundra	0	0	0	835	Palearctic	{"type":"MultiPoint","coordinates":[]}	0	0	0	0	0	0
000000000000000000dc	Tundra	11	PA11	774	Kola Peninsula tundra	0	0	0	379	Palearctic	{"type":"MultiPoint","coordinates":[]}	0	0	0	0	0	0
000000000000000000dd	Tundra	11	PA11	775	Northeast Siberian coastal tundra	0	0	0	498	Palearctic	{"type":"MultiPoint","coordinates":[]}	0	0	0	0	0	0
000000000000000000de	Tundra	11	PA11	776	Northwest Russian-Novaya Zemlya tundra	0	0	0	527	Palearctic	{"type":"MultiPoint","coordinates":[]}	0	0	0	0	0	0
000000000000000000df	Tundra	11	PA11	777	Novosibirsk Islands Arctic desert	0	0	0	533	Palearctic	{"type":"MultiPoint","coordinates":[]}	0	0	0	0	0	0
0	Tundra	11	PA11	778	Russian Arctic desert	0	0	0	42	Palearctic	{"type":"MultiPoint","coordinates":[]}	0	0	0	0	0	0
0	Tundra	11	PA11	779	Russian Bering tundra	0	0	0	69	Palearctic	{"type":"MultiPoint","coordinates":[]}	0	0	0	0	0	0
0	Tundra	11	PA11	780	Scandinavian Montane Birch forest and grasslands	0	0	0	617	Palearctic	{"type":"MultiPoint","coordinates":[]}	0	0	0	0	0	0
0	Tundra	11	PA11	781	Taimyr-Central Siberian tundra	0	0	0	721	Palearctic	{"type":"MultiPoint","coordinates":[]}	0	0	0	0	0	0
0	Tundra	11	PA11	782	Trans-Baikal Bald Mountain tundra	0	0	0	749	Palearctic	{"type":"MultiPoint","coordinates":[]}	0	0	0	0	0	0
0	Tundra	11	PA11	783	Wrangel Island Arctic desert	0	0	0	801	Palearctic	{"type":"MultiPoint","coordinates":[]}	0	0	0	0	0	0
0	Tundra	11	PA11	784	Yamal-Gydan tundra	0	0	0	804	Palearctic	{"type":"MultiPoint","coordinates":[]}	0	0	0	0	0	0
199	Tundra	11	AN11	117	Adelie Land tundra	0	0	0	1	Antarctica	{"type":"MultiPoint","coordinates":[]}	0	0	0	0	0	0
0000000000000000019a	Tundra	11	AN11	118	Central South Antarctic Peninsula tundra	0	0	0	150	Antarctica	{"type":"MultiPoint","coordinates":[]}	0	0	0	0	0	0
0000000000000000019b	Tundra	11	AN11	119	Dronning Maud Land tundra	0	0	0	846	Antarctica	{"type":"MultiPoint","coordinates":[]}	0	0	0	0	0	0
0000000000000000019c	Tundra	11	AN11	120	East Antarctic tundra	0	0	0	213	Antarctica	{"type":"MultiPoint","coordinates":[]}	0	0	0	0	0	0
0000000000000000019d	Tundra	11	AN11	121	Ellsworth Land tundra	0	0	0	249	Antarctica	{"type":"MultiPoint","coordinates":[]}	0	0	0	0	0	0
0000000000000000019e	Tundra	11	AN11	122	Ellsworth Mountains tundra	0	0	0	250	Antarctica	{"type":"MultiPoint","coordinates":[]}	0	0	0	0	0	0
0000000000000000019f	Tundra	11	AN11	123	Enderby Land tundra	0	0	0	252	Antarctica	{"type":"MultiPoint","coordinates":[]}	0	0	0	0	0	0
000000000000000001a0	Tundra	11	AN11	124	Marie Byrd Land tundra	0	0	0	847	Antarctica	{"type":"MultiPoint","coordinates":[]}	0	0	0	0	0	0
000000000000000001a1	Tundra	11	AN11	125	North Victoria Land tundra	0	0	0	493	Antarctica	{"type":"MultiPoint","coordinates":[]}	0	0	0	0	0	0
000000000000000001a2	Tundra	11	AN11	126	Northeast Antarctic Peninsula tundra	0	0	0	485	Antarctica	{"type":"MultiPoint","coordinates":[]}	0	0	0	0	0	0
000000000000000001a3	Tundra	11	AN11	127	Northwest Antarctic Peninsula tundra	0	0	0	486	Antarctica	{"type":"MultiPoint","coordinates":[]}	0	0	0	0	0	0
000000000000000001a4	Tundra	11	AN11	128	Prince Charles Mountains tundra	0	0	0	575	Antarctica	{"type":"MultiPoint","coordinates":[]}	0	0	0	0	0	0
000000000000000001a5	Tundra	11	AN11	129	Scotia Sea Islands tundra	0	0	0	618	Antarctica	{"type":"MultiPoint","coordinates":[]}	0	0	0	0	0	0
000000000000000001a6	Tundra	11	AN11	130	South Antarctic Peninsula tundra	0	0	0	646	Antarctica	{"type":"MultiPoint","coordinates":[]}	0	0	0	0	0	0
000000000000000001a7	Tundra	11	AN11	131	South Orkney Islands tundra	0	0	0	655	Antarctica	{"type":"MultiPoint","coordinates":[]}	0	0	0	0	0	0
000000000000000001a8	Tundra	11	AN11	132	South Victoria Land tundra	0	0	0	659	Antarctica	{"type":"MultiPoint","coordinates":[]}	0	0	0	0	0	0
000000000000000001a9	Tundra	11	AN11	133	Southern Indian Ocean Islands tundra	0	0	0	681	Antarctica	{"type":"MultiPoint","coordinates":[]}	0	0	0	0	0	0
000000000000000001aa	Tundra	11	AN11	134	Transantarctic Mountains tundra	0	0	0	753	Antarctica	{"type":"MultiPoint","coordinates":[]}	0	0	0	0	0	0
100000000	Tundra	11	AU11	196	Antipodes Subantarctic Islands tundra	0	0	0	32	Australasia	{"type":"MultiPoint","coordinates":[]}	0	0	0	0	0	0
268	N/A	11	N/A	0	Rock and Ice	0	0	0	207	N/A	{"type":"MultiPoint","coordinates":[]}	0	0	0	0	0	0
000000000000000002b9	Tundra	11	NE11	404	Ahklun and Kilbuck Upland Tundra	0	0	0	5	Nearctic	{"type":"MultiPoint","coordinates":[]}	0	0	0	0	0	0
000000000000000002ba	Tundra	11	NE11	405	Alaska-St. Elias Range tundra	0	0	0	10	Nearctic	{"type":"MultiPoint","coordinates":[]}	0	0	0	0	0	0
000000000000000002bb	Tundra	11	NE11	406	Aleutian Islands tundra	0	0	0	16	Nearctic	{"type":"MultiPoint","coordinates":[]}	0	0	0	0	0	0
000000000000000002bc	Tundra	11	NE11	407	Arctic coastal tundra	0	0	0	41	Nearctic	{"type":"MultiPoint","coordinates":[]}	0	0	0	0	0	0
000000000000000002bd	Tundra	11	NE11	408	Arctic foothills tundra	0	0	0	43	Nearctic	{"type":"MultiPoint","coordinates":[]}	0	0	0	0	0	0
000000000000000002be	Tundra	11	NE11	409	Beringia lowland tundra	0	0	0	70	Nearctic	{"type":"MultiPoint","coordinates":[]}	0	0	0	0	0	0
000000000000000002bf	Tundra	11	NE11	410	Beringia upland tundra	0	0	0	71	Nearctic	{"type":"MultiPoint","coordinates":[]}	0	0	0	0	0	0
000000000000000002c0	Tundra	11	NE11	411	Brooks-British Range tundra	0	0	0	84	Nearctic	{"type":"MultiPoint","coordinates":[]}	0	0	0	0	0	0
000000000000000002c1	Tundra	11	NE11	412	Canadian High Arctic tundra	0	0	0	311	Nearctic	{"type":"MultiPoint","coordinates":[]}	0	0	0	0	0	0
000000000000000002c2	Tundra	11	NE11	413	Canadian Low Arctic tundra	0	0	0	96	Nearctic	{"type":"MultiPoint","coordinates":[]}	0	0	0	0	0	0
000000000000000002c3	Tundra	11	NE11	414	Canadian Middle Arctic Tundra	0	0	0	439	Nearctic	{"type":"MultiPoint","coordinates":[]}	0	0	0	0	0	0
000000000000000002c4	Tundra	11	NE11	415	Davis Highlands tundra	0	0	0	201	Nearctic	{"type":"MultiPoint","coordinates":[]}	0	0	0	0	0	0
000000000000000002c5	Tundra	11	NE11	416	Interior Yukon-Alaska alpine tundra	0	0	0	339	Nearctic	{"type":"MultiPoint","coordinates":[]}	0	0	0	0	0	0
000000000000000002c6	Tundra	11	NE11	417	Kalaallit Nunaat Arctic steppe	0	0	0	837	Nearctic	{"type":"MultiPoint","coordinates":[]}	0	0	0	0	0	0
000000000000000002c7	Tundra	11	NE11	418	Kalaallit Nunaat High Arctic tundra	0	0	0	359	Nearctic	{"type":"MultiPoint","coordinates":[]}	0	0	0	0	0	0
000000000000000002c8	Tundra	11	NE11	419	Ogilvie-MacKenzie alpine tundra	0	0	0	539	Nearctic	{"type":"MultiPoint","coordinates":[]}	0	0	0	0	0	0
000000000000000002c9	Tundra	11	NE11	420	Pacific Coastal Mountain icefields and tundra	0	0	0	548	Nearctic	{"type":"MultiPoint","coordinates":[]}	0	0	0	0	0	0
000000000000000002ca	Tundra	11	NE11	421	Torngat Mountain tundra	0	0	0	748	Nearctic	{"type":"MultiPoint","coordinates":[]}	0	0	0	0	0	0
31	Mediterranean Forests, Woodlands & Scrub	12	NO12	596	Chilean Matorral	0	0	0	165	Neotropic	{"type":"MultiPoint","coordinates":[]}	0	0	0	0	0	0
0	Mediterranean Forests, Woodlands & Scrub	12	PA12	785	Aegean and Western Turkey sclerophyllous and mixed forests	0	0	0	3	Palearctic	{"type":"MultiPoint","coordinates":[]}	0	0	0	0	0	0
0	Mediterranean Forests, Woodlands & Scrub	12	PA12	786	Anatolian conifer and deciduous mixed forests	0	0	0	26	Palearctic	{"type":"MultiPoint","coordinates":[]}	0	0	0	0	0	0
0	Mediterranean Forests, Woodlands & Scrub	12	PA12	787	Canary Islands dry woodlands and forests	0	0	0	97	Palearctic	{"type":"MultiPoint","coordinates":[]}	0	0	0	0	0	0
000000000000000000ea	Mediterranean Forests, Woodlands & Scrub	12	PA12	788	Corsican montane broadleaf and mixed forests	0	0	0	185	Palearctic	{"type":"MultiPoint","coordinates":[]}	0	0	0	0	0	0
000000000000000000eb	Mediterranean Forests, Woodlands & Scrub	12	PA12	789	Crete Mediterranean forests	0	0	0	187	Palearctic	{"type":"MultiPoint","coordinates":[]}	0	0	0	0	0	0
000000000000000000ec	Mediterranean Forests, Woodlands & Scrub	12	PA12	790	Cyprus Mediterranean forests	0	0	0	197	Palearctic	{"type":"MultiPoint","coordinates":[]}	0	0	0	0	0	0
000000000000000000ed	Mediterranean Forests, Woodlands & Scrub	12	PA12	791	Eastern Mediterranean conifer-broadleaf forests	0	0	0	242	Palearctic	{"type":"MultiPoint","coordinates":[]}	0	0	0	0	0	0
000000000000000000ee	Mediterranean Forests, Woodlands & Scrub	12	PA12	792	Iberian conifer forests	0	0	0	329	Palearctic	{"type":"MultiPoint","coordinates":[]}	0	0	0	0	0	0
000000000000000000ef	Mediterranean Forests, Woodlands & Scrub	12	PA12	793	Iberian sclerophyllous and semi-deciduous forests	0	0	0	330	Palearctic	{"type":"MultiPoint","coordinates":[]}	0	0	0	0	0	0
000000000000000000f0	Mediterranean Forests, Woodlands & Scrub	12	PA12	794	Illyrian deciduous forests	0	0	0	332	Palearctic	{"type":"MultiPoint","coordinates":[]}	0	0	0	0	0	0
000000000000000000f1	Mediterranean Forests, Woodlands & Scrub	12	PA12	795	Italian sclerophyllous and semi-deciduous forests	0	0	0	347	Palearctic	{"type":"MultiPoint","coordinates":[]}	0	0	0	0	0	0
000000000000000000f2	Mediterranean Forests, Woodlands & Scrub	12	PA12	796	Mediterranean Acacia-Argania dry woodlands and succulent thickets	0	0	0	428	Palearctic	{"type":"MultiPoint","coordinates":[]}	0	0	0	0	0	0
000000000000000000f3	Mediterranean Forests, Woodlands & Scrub	12	PA12	797	Mediterranean dry woodlands and steppe	0	0	0	430	Palearctic	{"type":"MultiPoint","coordinates":[]}	0	0	0	0	0	0
000000000000000000f4	Mediterranean Forests, Woodlands & Scrub	12	PA12	798	Mediterranean woodlands and forests	0	0	0	432	Palearctic	{"type":"MultiPoint","coordinates":[]}	0	0	0	0	0	0
000000000000000000f5	Mediterranean Forests, Woodlands & Scrub	12	PA12	799	Northeast Spain and Southern France Mediterranean forests	0	0	0	503	Palearctic	{"type":"MultiPoint","coordinates":[]}	0	0	0	0	0	0
000000000000000000f6	Mediterranean Forests, Woodlands & Scrub	12	PA12	800	Northwest Iberian montane forests	0	0	0	526	Palearctic	{"type":"MultiPoint","coordinates":[]}	0	0	0	0	0	0
000000000000000000f7	Mediterranean Forests, Woodlands & Scrub	12	PA12	801	Pindus Mountains mixed forests	0	0	0	571	Palearctic	{"type":"MultiPoint","coordinates":[]}	0	0	0	0	0	0
000000000000000000f8	Mediterranean Forests, Woodlands & Scrub	12	PA12	802	South Apennine mixed montane forests	0	0	0	647	Palearctic	{"type":"MultiPoint","coordinates":[]}	0	0	0	0	0	0
000000000000000000f9	Mediterranean Forests, Woodlands & Scrub	12	PA12	803	Southeast Iberian shrubs and woodlands	0	0	0	667	Palearctic	{"type":"MultiPoint","coordinates":[]}	0	0	0	0	0	0
000000000000000000fa	Mediterranean Forests, Woodlands & Scrub	12	PA12	804	Southern Anatolian montane conifer and deciduous forests	0	0	0	672	Palearctic	{"type":"MultiPoint","coordinates":[]}	0	0	0	0	0	0
000000000000000000fb	Mediterranean Forests, Woodlands & Scrub	12	PA12	805	Southwest Iberian Mediterranean sclerophyllous and mixed forests	0	0	0	696	Palearctic	{"type":"MultiPoint","coordinates":[]}	0	0	0	0	0	0
000000000000000000fc	Mediterranean Forests, Woodlands & Scrub	12	PA12	806	Tyrrhenian-Adriatic sclerophyllous and mixed forests	0	0	0	760	Palearctic	{"type":"MultiPoint","coordinates":[]}	0	0	0	0	0	0
0000000000000000017d	Mediterranean Forests, Woodlands & Scrub	12	AF12	88	Albany thickets	0	0	0	12	Afrotropic	{"type":"MultiPoint","coordinates":[]}	0	0	0	0	0	0
0000000000000000017e	Mediterranean Forests, Woodlands & Scrub	12	AF12	89	Fynbos shrubland	0	0	0	273	Afrotropic	{"type":"MultiPoint","coordinates":[]}	0	0	0	0	0	0
0000000000000000017f	Mediterranean Forests, Woodlands & Scrub	12	AF12	90	Renosterveld shrubland	0	0	0	596	Afrotropic	{"type":"MultiPoint","coordinates":[]}	0	0	0	0	0	0
1000000000	Mediterranean Forests, Woodlands & Scrub	12	AU12	197	Coolgardie woodlands	0	0	0	179	Australasia	{"type":"MultiPoint","coordinates":[]}	0	0	0	0	0	0
000000000000000001ea	Mediterranean Forests, Woodlands & Scrub	12	AU12	198	Esperance mallee	0	0	0	256	Australasia	{"type":"MultiPoint","coordinates":[]}	0	0	0	0	0	0
000000000000000001eb	Mediterranean Forests, Woodlands & Scrub	12	AU12	199	Eyre and York mallee	0	0	0	264	Australasia	{"type":"MultiPoint","coordinates":[]}	0	0	0	0	0	0
000000000000000001ec	Mediterranean Forests, Woodlands & Scrub	12	AU12	200	Flinders-Lofty montane woodlands	0	0	0	270	Australasia	{"type":"MultiPoint","coordinates":[]}	0	0	0	0	0	0
000000000000000001ed	Mediterranean Forests, Woodlands & Scrub	12	AU12	201	Hampton mallee and woodlands	0	0	0	304	Australasia	{"type":"MultiPoint","coordinates":[]}	0	0	0	0	0	0
000000000000000001ee	Mediterranean Forests, Woodlands & Scrub	12	AU12	202	Jarrah-Karri forest and shrublands	0	0	0	353	Australasia	{"type":"MultiPoint","coordinates":[]}	0	0	0	0	0	0
000000000000000001ef	Mediterranean Forests, Woodlands & Scrub	12	AU12	203	Murray-Darling woodlands and mallee	0	0	0	456	Australasia	{"type":"MultiPoint","coordinates":[]}	0	0	0	0	0	0
000000000000000001f0	Mediterranean Forests, Woodlands & Scrub	12	AU12	204	Naracoorte woodlands	0	0	0	466	Australasia	{"type":"MultiPoint","coordinates":[]}	0	0	0	0	0	0
000000000000000001f1	Mediterranean Forests, Woodlands & Scrub	12	AU12	205	Southwest Australia savanna	0	0	0	693	Australasia	{"type":"MultiPoint","coordinates":[]}	0	0	0	0	0	0
000000000000000001f2	Mediterranean Forests, Woodlands & Scrub	12	AU12	206	Southwest Australia woodlands	0	0	0	694	Australasia	{"type":"MultiPoint","coordinates":[]}	0	0	0	0	0	0
000000000000000002cb	Mediterranean Forests, Woodlands & Scrub	12	NE12	422	California coastal sage and chaparral	0	0	0	90	Nearctic	{"type":"MultiPoint","coordinates":[]}	0	0	0	0	0	0
000000000000000002cc	Mediterranean Forests, Woodlands & Scrub	12	NE12	423	California interior chaparral and woodlands	0	0	0	91	Nearctic	{"type":"MultiPoint","coordinates":[]}	0	0	0	0	0	0
000000000000000002cd	Mediterranean Forests, Woodlands & Scrub	12	NE12	424	California montane chaparral and woodlands	0	0	0	92	Nearctic	{"type":"MultiPoint","coordinates":[]}	0	0	0	0	0	0
000000000000000002ce	Mediterranean Forests, Woodlands & Scrub	12	NE12	425	Santa Lucia Montane Chaparral & Woodlands	0	0	0	607	Nearctic	{"type":"MultiPoint","coordinates":[]}	0	0	0	0	0	0
32	Deserts & Xeric Shrublands	13	NO13	597	Araya and Paria xeric scrub	0	0	0	40	Neotropic	{"type":"MultiPoint","coordinates":[]}	0	0	0	0	0	0
33	Deserts & Xeric Shrublands	13	NO13	598	Atacama desert	0	0	0	47	Neotropic	{"type":"MultiPoint","coordinates":[]}	0	0	0	0	0	0
34	Deserts & Xeric Shrublands	13	NO13	599	Caribbean shrublands	0	0	0	104	Neotropic	{"type":"MultiPoint","coordinates":[]}	0	0	0	0	0	0
35	Deserts & Xeric Shrublands	13	NO13	600	Cuban cactus scrub	0	0	0	192	Neotropic	{"type":"MultiPoint","coordinates":[]}	0	0	0	0	0	0
36	Deserts & Xeric Shrublands	13	NO13	601	Galï¿½pagos Islands xeric scrub	0	0	0	274	Neotropic	{"type":"MultiPoint","coordinates":[]}	0	0	0	0	0	0
37	Deserts & Xeric Shrublands	13	NO13	602	Guajira-Barranquilla xeric scrub	0	0	0	288	Neotropic	{"type":"MultiPoint","coordinates":[]}	0	0	0	0	0	0
38	Deserts & Xeric Shrublands	13	NO13	603	La Costa xeric shrublands	0	0	0	384	Neotropic	{"type":"MultiPoint","coordinates":[]}	0	0	0	0	0	0
39	Deserts & Xeric Shrublands	13	NO13	604	Malpelo Island xeric scrub	0	0	0	415	Neotropic	{"type":"MultiPoint","coordinates":[]}	0	0	0	0	0	0
0000000000000000003a	Deserts & Xeric Shrublands	13	NO13	605	Motagua Valley thornscrub	0	0	0	453	Neotropic	{"type":"MultiPoint","coordinates":[]}	0	0	0	0	0	0
0000000000000000003b	Deserts & Xeric Shrublands	13	NO13	606	Paraguanï¿½ xeric scrub	0	0	0	558	Neotropic	{"type":"MultiPoint","coordinates":[]}	0	0	0	0	0	0
0000000000000000003c	Deserts & Xeric Shrublands	13	NO13	607	San Lucan xeric scrub	0	0	0	606	Neotropic	{"type":"MultiPoint","coordinates":[]}	0	0	0	0	0	0
0000000000000000003d	Deserts & Xeric Shrublands	13	NO13	608	Sechura desert	0	0	0	619	Neotropic	{"type":"MultiPoint","coordinates":[]}	0	0	0	0	0	0
0000000000000000003e	Deserts & Xeric Shrublands	13	NO13	609	St. Peter and St. Paul Rocks	0	0	0	700	Neotropic	{"type":"MultiPoint","coordinates":[]}	0	0	0	0	0	0
0000000000000000003f	Deserts & Xeric Shrublands	13	NO13	610	Tehuacï¿½n Valley matorral	0	0	0	732	Neotropic	{"type":"MultiPoint","coordinates":[]}	0	0	0	0	0	0
000000000000000000fd	Deserts & Xeric Shrublands	13	PA13	807	Afghan Mountains semi-desert	0	0	0	4	Palearctic	{"type":"MultiPoint","coordinates":[]}	0	0	0	0	0	0
000000000000000000fe	Deserts & Xeric Shrublands	13	PA13	808	Alashan Plateau semi-desert	0	0	0	9	Palearctic	{"type":"MultiPoint","coordinates":[]}	0	0	0	0	0	0
000000000000000000ff	Deserts & Xeric Shrublands	13	PA13	809	Arabian desert	0	0	0	832	Palearctic	{"type":"MultiPoint","coordinates":[]}	0	0	0	0	0	0
100	Deserts & Xeric Shrublands	13	PA13	810	Arabian sand desert	0	0	0	38	Palearctic	{"type":"MultiPoint","coordinates":[]}	0	0	0	0	0	0
101	Deserts & Xeric Shrublands	13	PA13	811	Arabian-Persian Gulf coastal plain desert	0	0	0	830	Palearctic	{"type":"MultiPoint","coordinates":[]}	0	0	0	0	0	0
102	Deserts & Xeric Shrublands	13	PA13	812	Azerbaijan shrub desert and steppe	0	0	0	54	Palearctic	{"type":"MultiPoint","coordinates":[]}	0	0	0	0	0	0
103	Deserts & Xeric Shrublands	13	PA13	813	Badghyz and Karabil semi-desert	0	0	0	56	Palearctic	{"type":"MultiPoint","coordinates":[]}	0	0	0	0	0	0
104	Deserts & Xeric Shrublands	13	PA13	814	Baluchistan xeric woodlands	0	0	0	65	Palearctic	{"type":"MultiPoint","coordinates":[]}	0	0	0	0	0	0
105	Deserts & Xeric Shrublands	13	PA13	815	Caspian lowland desert	0	0	0	110	Palearctic	{"type":"MultiPoint","coordinates":[]}	0	0	0	0	0	0
106	Deserts & Xeric Shrublands	13	PA13	816	Central Afghan Mountains xeric woodlands	0	0	0	117	Palearctic	{"type":"MultiPoint","coordinates":[]}	0	0	0	0	0	0
107	Deserts & Xeric Shrublands	13	PA13	817	Central Asian northern desert	0	0	0	130	Palearctic	{"type":"MultiPoint","coordinates":[]}	0	0	0	0	0	0
108	Deserts & Xeric Shrublands	13	PA13	818	Central Asian riparian woodlands	0	0	0	131	Palearctic	{"type":"MultiPoint","coordinates":[]}	0	0	0	0	0	0
109	Deserts & Xeric Shrublands	13	PA13	819	Central Asian southern desert	0	0	0	132	Palearctic	{"type":"MultiPoint","coordinates":[]}	0	0	0	0	0	0
0000000000000000010a	Deserts & Xeric Shrublands	13	PA13	820	Central Persian desert basins	0	0	0	145	Palearctic	{"type":"MultiPoint","coordinates":[]}	0	0	0	0	0	0
0000000000000000010b	Deserts & Xeric Shrublands	13	PA13	821	East Arabian fog shrublands and sand desert	0	0	0	214	Palearctic	{"type":"MultiPoint","coordinates":[]}	0	0	0	0	0	0
0000000000000000010c	Deserts & Xeric Shrublands	13	PA13	822	East Sahara Desert	0	0	0	218	Palearctic	{"type":"MultiPoint","coordinates":[]}	0	0	0	0	0	0
0000000000000000010d	Deserts & Xeric Shrublands	13	PA13	823	East Saharan montane xeric woodlands	0	0	0	219	Palearctic	{"type":"MultiPoint","coordinates":[]}	0	0	0	0	0	0
0000000000000000010e	Deserts & Xeric Shrublands	13	PA13	824	Eastern Gobi desert steppe	0	0	0	233	Palearctic	{"type":"MultiPoint","coordinates":[]}	0	0	0	0	0	0
0000000000000000010f	Deserts & Xeric Shrublands	13	PA13	825	Gobi Lakes Valley desert steppe	0	0	0	280	Palearctic	{"type":"MultiPoint","coordinates":[]}	0	0	0	0	0	0
110	Deserts & Xeric Shrublands	13	PA13	826	Great Lakes Basin desert steppe	0	0	0	284	Palearctic	{"type":"MultiPoint","coordinates":[]}	0	0	0	0	0	0
111	Deserts & Xeric Shrublands	13	PA13	827	Junggar Basin semi-desert	0	0	0	357	Palearctic	{"type":"MultiPoint","coordinates":[]}	0	0	0	0	0	0
112	Deserts & Xeric Shrublands	13	PA13	828	Kazakh semi-desert	0	0	0	368	Palearctic	{"type":"MultiPoint","coordinates":[]}	0	0	0	0	0	0
113	Deserts & Xeric Shrublands	13	PA13	829	Kopet Dag semi-desert	0	0	0	380	Palearctic	{"type":"MultiPoint","coordinates":[]}	0	0	0	0	0	0
114	Deserts & Xeric Shrublands	13	PA13	830	Mesopotamian shrub desert	0	0	0	437	Palearctic	{"type":"MultiPoint","coordinates":[]}	0	0	0	0	0	0
115	Deserts & Xeric Shrublands	13	PA13	831	North Arabian desert	0	0	0	487	Palearctic	{"type":"MultiPoint","coordinates":[]}	0	0	0	0	0	0
116	Deserts & Xeric Shrublands	13	PA13	832	North Arabian highland shrublands	0	0	0	488	Palearctic	{"type":"MultiPoint","coordinates":[]}	0	0	0	0	0	0
117	Deserts & Xeric Shrublands	13	PA13	833	North Saharan Xeric Steppe and Woodland	0	0	0	490	Palearctic	{"type":"MultiPoint","coordinates":[]}	0	0	0	0	0	0
118	Deserts & Xeric Shrublands	13	PA13	834	Paropamisus xeric woodlands	0	0	0	560	Palearctic	{"type":"MultiPoint","coordinates":[]}	0	0	0	0	0	0
119	Deserts & Xeric Shrublands	13	PA13	835	Qaidam Basin semi-desert	0	0	0	582	Palearctic	{"type":"MultiPoint","coordinates":[]}	0	0	0	0	0	0
0000000000000000011a	Deserts & Xeric Shrublands	13	PA13	836	Red Sea coastal desert	0	0	0	593	Palearctic	{"type":"MultiPoint","coordinates":[]}	0	0	0	0	0	0
0000000000000000011b	Deserts & Xeric Shrublands	13	PA13	837	Red Sea-Arabian Desert shrublands	0	0	0	592	Palearctic	{"type":"MultiPoint","coordinates":[]}	0	0	0	0	0	0
0000000000000000011c	Deserts & Xeric Shrublands	13	PA13	838	Registan-North Pakistan sandy desert	0	0	0	595	Palearctic	{"type":"MultiPoint","coordinates":[]}	0	0	0	0	0	0
0000000000000000011d	Deserts & Xeric Shrublands	13	PA13	839	Saharan Atlantic coastal desert	0	0	0	49	Palearctic	{"type":"MultiPoint","coordinates":[]}	0	0	0	0	0	0
0000000000000000011e	Deserts & Xeric Shrublands	13	PA13	840	South Arabian plains and plateau desert	0	0	0	831	Palearctic	{"type":"MultiPoint","coordinates":[]}	0	0	0	0	0	0
0000000000000000011f	Deserts & Xeric Shrublands	13	PA13	841	South Iran Nubo-Sindian desert and semi-desert	0	0	0	652	Palearctic	{"type":"MultiPoint","coordinates":[]}	0	0	0	0	0	0
120	Deserts & Xeric Shrublands	13	PA13	842	South Sahara desert	0	0	0	656	Palearctic	{"type":"MultiPoint","coordinates":[]}	0	0	0	0	0	0
121	Deserts & Xeric Shrublands	13	PA13	843	Taklimakan desert	0	0	0	723	Palearctic	{"type":"MultiPoint","coordinates":[]}	0	0	0	0	0	0
122	Deserts & Xeric Shrublands	13	PA13	844	Tibesti-Jebel Uweinat montane xeric woodlands	0	0	0	740	Palearctic	{"type":"MultiPoint","coordinates":[]}	0	0	0	0	0	0
123	Deserts & Xeric Shrublands	13	PA13	845	West Sahara desert	0	0	0	779	Palearctic	{"type":"MultiPoint","coordinates":[]}	0	0	0	0	0	0
124	Deserts & Xeric Shrublands	13	PA13	846	West Saharan montane xeric woodlands	0	0	0	780	Palearctic	{"type":"MultiPoint","coordinates":[]}	0	0	0	0	0	0
146	Deserts & Xeric Shrublands	13	AF07	105	Socotra Island xeric shrublands	0	0	0	639	Afrotropic	{"type":"MultiPoint","coordinates":[]}	0	0	0	0	0	0
180	Deserts & Xeric Shrublands	13	AF13	91	Aldabra Island xeric scrub	0	0	0	15	Afrotropic	{"type":"MultiPoint","coordinates":[]}	0	0	0	0	0	0
181	Deserts & Xeric Shrublands	13	AF13	92	Djibouti xeric shrublands	0	0	0	204	Afrotropic	{"type":"MultiPoint","coordinates":[]}	0	0	0	0	0	0
182	Deserts & Xeric Shrublands	13	AF13	93	Eritrean coastal desert	0	0	0	255	Afrotropic	{"type":"MultiPoint","coordinates":[]}	0	0	0	0	0	0
183	Deserts & Xeric Shrublands	13	AF13	94	Gariep Karoo	0	0	0	275	Afrotropic	{"type":"MultiPoint","coordinates":[]}	0	0	0	0	0	0
184	Deserts & Xeric Shrublands	13	AF13	95	Hobyo grasslands and shrublands	0	0	0	320	Afrotropic	{"type":"MultiPoint","coordinates":[]}	0	0	0	0	0	0
185	Deserts & Xeric Shrublands	13	AF13	96	Ile Europa and Bassas da India xeric scrub	0	0	0	834	Afrotropic	{"type":"MultiPoint","coordinates":[]}	0	0	0	0	0	0
186	Deserts & Xeric Shrublands	13	AF13	97	Kalahari xeric savanna	0	0	0	361	Afrotropic	{"type":"MultiPoint","coordinates":[]}	0	0	0	0	0	0
187	Deserts & Xeric Shrublands	13	AF13	98	Kaokoveld desert	0	0	0	364	Afrotropic	{"type":"MultiPoint","coordinates":[]}	0	0	0	0	0	0
188	Deserts & Xeric Shrublands	13	AF13	99	Madagascar spiny thickets	0	0	0	403	Afrotropic	{"type":"MultiPoint","coordinates":[]}	0	0	0	0	0	0
189	Deserts & Xeric Shrublands	13	AF13	100	Madagascar succulent woodlands	0	0	0	405	Afrotropic	{"type":"MultiPoint","coordinates":[]}	0	0	0	0	0	0
0000000000000000018a	Deserts & Xeric Shrublands	13	AF13	101	Nama Karoo shrublands	0	0	0	460	Afrotropic	{"type":"MultiPoint","coordinates":[]}	0	0	0	0	0	0
0000000000000000018b	Deserts & Xeric Shrublands	13	AF13	102	Namaqualand-Richtersveld steppe	0	0	0	461	Afrotropic	{"type":"MultiPoint","coordinates":[]}	0	0	0	0	0	0
0000000000000000018c	Deserts & Xeric Shrublands	13	AF13	103	Namib Desert	0	0	0	462	Afrotropic	{"type":"MultiPoint","coordinates":[]}	0	0	0	0	0	0
0000000000000000018d	Deserts & Xeric Shrublands	13	AF13	104	Namibian savanna woodlands	0	0	0	463	Afrotropic	{"type":"MultiPoint","coordinates":[]}	0	0	0	0	0	0
0000000000000000018e	Deserts & Xeric Shrublands	13	AF13	106	Somali montane xeric woodlands	0	0	0	491	Afrotropic	{"type":"MultiPoint","coordinates":[]}	0	0	0	0	0	0
0000000000000000018f	Deserts & Xeric Shrublands	13	AF13	107	Southwest Arabian coastal xeric shrublands	0	0	0	829	Afrotropic	{"type":"MultiPoint","coordinates":[]}	0	0	0	0	0	0
190	Deserts & Xeric Shrublands	13	AF13	108	Southwest Arabian Escarpment shrublands and woodlands	0	0	0	691	Afrotropic	{"type":"MultiPoint","coordinates":[]}	0	0	0	0	0	0
191	Deserts & Xeric Shrublands	13	AF13	109	Southwest Arabian highland xeric scrub	0	0	0	692	Afrotropic	{"type":"MultiPoint","coordinates":[]}	0	0	0	0	0	0
192	Deserts & Xeric Shrublands	13	AF13	110	Succulent Karoo xeric shrublands	0	0	0	701	Afrotropic	{"type":"MultiPoint","coordinates":[]}	0	0	0	0	0	0
000000000000000001f3	Deserts & Xeric Shrublands	13	AU13	207	Carnarvon xeric shrublands	0	0	0	105	Australasia	{"type":"MultiPoint","coordinates":[]}	0	0	0	0	0	0
000000000000000001f4	Deserts & Xeric Shrublands	13	AU13	208	Central Ranges xeric scrub	0	0	0	149	Australasia	{"type":"MultiPoint","coordinates":[]}	0	0	0	0	0	0
000000000000000001f5	Deserts & Xeric Shrublands	13	AU13	209	Gibson desert	0	0	0	277	Australasia	{"type":"MultiPoint","coordinates":[]}	0	0	0	0	0	0
000000000000000001f6	Deserts & Xeric Shrublands	13	AU13	210	Great Sandy-Tanami desert	0	0	0	285	Australasia	{"type":"MultiPoint","coordinates":[]}	0	0	0	0	0	0
000000000000000001f7	Deserts & Xeric Shrublands	13	AU13	211	Great Victoria desert	0	0	0	286	Australasia	{"type":"MultiPoint","coordinates":[]}	0	0	0	0	0	0
000000000000000001f8	Deserts & Xeric Shrublands	13	AU13	212	Nullarbor Plains xeric shrublands	0	0	0	535	Australasia	{"type":"MultiPoint","coordinates":[]}	0	0	0	0	0	0
000000000000000001f9	Deserts & Xeric Shrublands	13	AU13	213	Pilbara shrublands	0	0	0	570	Australasia	{"type":"MultiPoint","coordinates":[]}	0	0	0	0	0	0
000000000000000001fa	Deserts & Xeric Shrublands	13	AU13	214	Simpson desert	0	0	0	634	Australasia	{"type":"MultiPoint","coordinates":[]}	0	0	0	0	0	0
000000000000000001fb	Deserts & Xeric Shrublands	13	AU13	215	Tirari-Sturt stony desert	0	0	0	744	Australasia	{"type":"MultiPoint","coordinates":[]}	0	0	0	0	0	0
000000000000000001fc	Deserts & Xeric Shrublands	13	AU13	216	Western Australian Mulga shrublands	0	0	0	783	Australasia	{"type":"MultiPoint","coordinates":[]}	0	0	0	0	0	0
0000000000000000025e	Deserts & Xeric Shrublands	13	IN13	314	Aravalli west thorn scrub forests	0	0	0	532	Indomalayan	{"type":"MultiPoint","coordinates":[]}	0	0	0	0	0	0
0000000000000000025f	Deserts & Xeric Shrublands	13	IN13	315	Deccan thorn scrub forests	0	0	0	202	Indomalayan	{"type":"MultiPoint","coordinates":[]}	0	0	0	0	0	0
260	Deserts & Xeric Shrublands	13	IN13	316	Godavari-Krishna mangroves	0	0	0	279	Indomalayan	{"type":"MultiPoint","coordinates":[]}	0	0	0	0	0	0
261	Deserts & Xeric Shrublands	13	IN13	317	Indus Valley desert	0	0	0	335	Indomalayan	{"type":"MultiPoint","coordinates":[]}	0	0	0	0	0	0
262	Deserts & Xeric Shrublands	13	IN13	318	Thar desert	0	0	0	736	Indomalayan	{"type":"MultiPoint","coordinates":[]}	0	0	0	0	0	0
000000000000000002cf	Deserts & Xeric Shrublands	13	NE13	426	Baja California desert	0	0	0	60	Nearctic	{"type":"MultiPoint","coordinates":[]}	0	0	0	0	0	0
000000000000000002d0	Deserts & Xeric Shrublands	13	NE13	427	Central Mexican matorral	0	0	0	143	Nearctic	{"type":"MultiPoint","coordinates":[]}	0	0	0	0	0	0
000000000000000002d1	Deserts & Xeric Shrublands	13	NE13	428	Chihuahuan desert	0	0	0	164	Nearctic	{"type":"MultiPoint","coordinates":[]}	0	0	0	0	0	0
000000000000000002d2	Deserts & Xeric Shrublands	13	NE13	429	Colorado Plateau shrublands	0	0	0	174	Nearctic	{"type":"MultiPoint","coordinates":[]}	0	0	0	0	0	0
000000000000000002d3	Deserts & Xeric Shrublands	13	NE13	430	Great Basin shrub steppe	0	0	0	283	Nearctic	{"type":"MultiPoint","coordinates":[]}	0	0	0	0	0	0
000000000000000002d4	Deserts & Xeric Shrublands	13	NE13	431	Gulf of California xeric scrub	0	0	0	299	Nearctic	{"type":"MultiPoint","coordinates":[]}	0	0	0	0	0	0
000000000000000002d5	Deserts & Xeric Shrublands	13	NE13	432	Meseta Central matorral	0	0	0	435	Nearctic	{"type":"MultiPoint","coordinates":[]}	0	0	0	0	0	0
000000000000000002d6	Deserts & Xeric Shrublands	13	NE13	433	Mojave desert	0	0	0	449	Nearctic	{"type":"MultiPoint","coordinates":[]}	0	0	0	0	0	0
000000000000000002d7	Deserts & Xeric Shrublands	13	NE13	434	Snake-Columbia shrub steppe	0	0	0	637	Nearctic	{"type":"MultiPoint","coordinates":[]}	0	0	0	0	0	0
000000000000000002d8	Deserts & Xeric Shrublands	13	NE13	435	Sonoran desert	0	0	0	644	Nearctic	{"type":"MultiPoint","coordinates":[]}	0	0	0	0	0	0
000000000000000002d9	Deserts & Xeric Shrublands	13	NE13	436	Tamaulipan matorral	0	0	0	725	Nearctic	{"type":"MultiPoint","coordinates":[]}	0	0	0	0	0	0
000000000000000002da	Deserts & Xeric Shrublands	13	NE13	437	Tamaulipan mezquital	0	0	0	726	Nearctic	{"type":"MultiPoint","coordinates":[]}	0	0	0	0	0	0
000000000000000002db	Deserts & Xeric Shrublands	13	NE13	438	Wyoming Basin shrub steppe	0	0	0	802	Nearctic	{"type":"MultiPoint","coordinates":[]}	0	0	0	0	0	0
0	Tropical & Subtropical Dry Broadleaf Forests	2	NO02	637	Marianas tropical dry forests	2.48	0	0	423	Oceania	{"type":"MultiPoint","coordinates":[]}	0	0	0	0	0	0
1	Tropical & Subtropical Dry Broadleaf Forests	2	NO02	638	Yap tropical dry forests	2.48	0	0	805	Oceania	{"type":"MultiPoint","coordinates":[]}	0	0	0	0	0	0
143	Tropical & Subtropical Dry Broadleaf Forests	2	AF02	31	Cape Verde Islands dry forests	2.48	0	0	100	Afrotropic	{"type":"MultiPoint","coordinates":[]}	0	0	0	0	0	0
144	Tropical & Subtropical Dry Broadleaf Forests	2	AF02	32	Madagascar dry deciduous forests	2.48	0	0	399	Afrotropic	{"type":"MultiPoint","coordinates":[]}	0	0	0	0	0	0
145	Tropical & Subtropical Dry Broadleaf Forests	2	AF02	33	Zambezian evergreen dry forests	2.48	0	0	817	Afrotropic	{"type":"MultiPoint","coordinates":[]}	0	0	0	0	0	0
000000000000000001c7	Tropical & Subtropical Dry Broadleaf Forests	2	AU02	163	Lesser Sundas deciduous forests	2.48	0	0	388	Australasia	{"type":"MultiPoint","coordinates":[]}	0	0	0	0	0	0
000000000000000001c8	Tropical & Subtropical Dry Broadleaf Forests	2	AU02	164	New Caledonia dry forests	2.48	0	0	474	Australasia	{"type":"MultiPoint","coordinates":[]}	0	0	0	0	0	0
000000000000000001c9	Tropical & Subtropical Dry Broadleaf Forests	2	AU02	165	Sumba deciduous forests	2.48	0	0	713	Australasia	{"type":"MultiPoint","coordinates":[]}	0	0	0	0	0	0
000000000000000001ca	Tropical & Subtropical Dry Broadleaf Forests	2	AU02	166	Timor and Wetar deciduous forests	2.48	0	0	743	Australasia	{"type":"MultiPoint","coordinates":[]}	0	0	0	0	0	0
247	Tropical & Subtropical Dry Broadleaf Forests	2	IN02	291	Central Indochina dry forests	2.48	0	2.48	141	Indomalayan	{"type":"MultiPoint","coordinates":[]}	0	0	0	0	0	0
248	Tropical & Subtropical Dry Broadleaf Forests	2	IN02	292	Chhota-Nagpur dry deciduous forests	2.48	0	2.48	161	Indomalayan	{"type":"MultiPoint","coordinates":[]}	0	0	0	0	0	0
0000000000000000024a	Tropical & Subtropical Dry Broadleaf Forests	2	IN02	294	Irrawaddy dry forests	2.48	0	2.48	341	Indomalayan	{"type":"MultiPoint","coordinates":[]}	0	0	0	0	0	0
0000000000000000024d	Tropical & Subtropical Dry Broadleaf Forests	2	IN02	297	North Deccan dry deciduous forests	2.48	0	2.48	512	Indomalayan	{"type":"MultiPoint","coordinates":[]}	0	0	0	0	0	0
250	Tropical & Subtropical Dry Broadleaf Forests	2	IN02	300	Southern Vietnam lowland dry forests	2.48	0	2.48	689	Indomalayan	{"type":"MultiPoint","coordinates":[]}	0	0	0	0	0	0
251	Tropical & Subtropical Dry Broadleaf Forests	2	IN02	301	Sri Lanka dry-zone dry evergreen forests	2.48	0	2.48	697	Indomalayan	{"type":"MultiPoint","coordinates":[]}	0	0	0	0	0	0
269	Tropical & Subtropical Dry Broadleaf Forests	2	NE02	324	Sonoran-Sinaloan subtropical dry forest	2.48	0	0	643	Nearctic	{"type":"MultiPoint","coordinates":[]}	0	0	0	0	0	0
0000000000000000032d	Tropical & Subtropical Dry Broadleaf Forests	2	NO02	520	Apure-Villavicencio dry forests	2.48	0	0	37	Neotropic	{"type":"MultiPoint","coordinates":[]}	0	0	0	0	0	0
0000000000000000032e	Tropical & Subtropical Dry Broadleaf Forests	2	NO02	521	Bajï¿½o dry forests	2.48	0	0	61	Neotropic	{"type":"MultiPoint","coordinates":[]}	0	0	0	0	0	0
0000000000000000032f	Tropical & Subtropical Dry Broadleaf Forests	2	NO02	522	Balsas dry forests	2.48	0	0	63	Neotropic	{"type":"MultiPoint","coordinates":[]}	0	0	0	0	0	0
330	Tropical & Subtropical Dry Broadleaf Forests	2	NO02	523	Bolivian montane dry forests	2.48	0	0	76	Neotropic	{"type":"MultiPoint","coordinates":[]}	0	0	0	0	0	0
331	Tropical & Subtropical Dry Broadleaf Forests	2	NO02	524	Brazilian Atlantic dry forests	2.48	0	0	820	Neotropic	{"type":"MultiPoint","coordinates":[]}	0	0	0	0	0	0
332	Tropical & Subtropical Dry Broadleaf Forests	2	NO02	525	Caatinga	2.48	0	0	86	Neotropic	{"type":"MultiPoint","coordinates":[]}	0	0	0	0	0	0
333	Tropical & Subtropical Dry Broadleaf Forests	2	NO02	526	Cauca Valley dry forests	2.48	0	0	112	Neotropic	{"type":"MultiPoint","coordinates":[]}	0	0	0	0	0	0
334	Tropical & Subtropical Dry Broadleaf Forests	2	NO02	527	Central American dry forests	2.48	0	0	120	Neotropic	{"type":"MultiPoint","coordinates":[]}	0	0	0	0	0	0
335	Tropical & Subtropical Dry Broadleaf Forests	2	NO02	528	Chiapas Depression dry forests	2.48	0	0	162	Neotropic	{"type":"MultiPoint","coordinates":[]}	0	0	0	0	0	0
336	Tropical & Subtropical Dry Broadleaf Forests	2	NO02	529	Chiquitano dry forests	2.48	0	0	168	Neotropic	{"type":"MultiPoint","coordinates":[]}	0	0	0	0	0	0
337	Tropical & Subtropical Dry Broadleaf Forests	2	NO02	530	Cuban dry forests	2.48	0	0	193	Neotropic	{"type":"MultiPoint","coordinates":[]}	0	0	0	0	0	0
338	Tropical & Subtropical Dry Broadleaf Forests	2	NO02	531	Ecuadorian dry forests	2.48	0	0	245	Neotropic	{"type":"MultiPoint","coordinates":[]}	0	0	0	0	0	0
339	Tropical & Subtropical Dry Broadleaf Forests	2	NO02	532	Hispaniolan dry forests	2.48	0	0	317	Neotropic	{"type":"MultiPoint","coordinates":[]}	0	0	0	0	0	0
0000000000000000033a	Tropical & Subtropical Dry Broadleaf Forests	2	NO02	533	Islas Revillagigedo dry forests	2.48	0	0	344	Neotropic	{"type":"MultiPoint","coordinates":[]}	0	0	0	0	0	0
0000000000000000033b	Tropical & Subtropical Dry Broadleaf Forests	2	NO02	534	Jalisco dry forests	2.48	0	0	349	Neotropic	{"type":"MultiPoint","coordinates":[]}	0	0	0	0	0	0
0000000000000000033c	Tropical & Subtropical Dry Broadleaf Forests	2	NO02	535	Jamaican dry forests	2.48	0	0	350	Neotropic	{"type":"MultiPoint","coordinates":[]}	0	0	0	0	0	0
0000000000000000033d	Tropical & Subtropical Dry Broadleaf Forests	2	NO02	536	Lara-Falcï¿½n dry forests	2.48	0	0	386	Neotropic	{"type":"MultiPoint","coordinates":[]}	0	0	0	0	0	0
0000000000000000033e	Tropical & Subtropical Dry Broadleaf Forests	2	NO02	537	Lesser Antillean dry forests	2.48	0	0	844	Neotropic	{"type":"MultiPoint","coordinates":[]}	0	0	0	0	0	0
0000000000000000033f	Tropical & Subtropical Dry Broadleaf Forests	2	NO02	538	Magdalena Valley dry forests	2.48	0	0	409	Neotropic	{"type":"MultiPoint","coordinates":[]}	0	0	0	0	0	0
340	Tropical & Subtropical Dry Broadleaf Forests	2	NO02	539	Maracaibo dry forests	2.48	0	0	419	Neotropic	{"type":"MultiPoint","coordinates":[]}	0	0	0	0	0	0
341	Tropical & Subtropical Dry Broadleaf Forests	2	NO02	540	Maranhï¿½o Babaï¿½u forests	2.48	0	0	421	Neotropic	{"type":"MultiPoint","coordinates":[]}	0	0	0	0	0	0
342	Tropical & Subtropical Dry Broadleaf Forests	2	NO02	541	Panamanian dry forests	2.48	0	0	553	Neotropic	{"type":"MultiPoint","coordinates":[]}	0	0	0	0	0	0
343	Tropical & Subtropical Dry Broadleaf Forests	2	NO02	542	Patï¿½a valley dry forests	2.48	0	0	562	Neotropic	{"type":"MultiPoint","coordinates":[]}	0	0	0	0	0	0
344	Tropical & Subtropical Dry Broadleaf Forests	2	NO02	543	Puerto Rican dry forests	2.48	0	0	576	Neotropic	{"type":"MultiPoint","coordinates":[]}	0	0	0	0	0	0
345	Tropical & Subtropical Dry Broadleaf Forests	2	NO02	544	Sierra de la Laguna dry forests	2.48	0	0	625	Neotropic	{"type":"MultiPoint","coordinates":[]}	0	0	0	0	0	0
346	Tropical & Subtropical Dry Broadleaf Forests	2	NO02	545	Sinaloan dry forests	2.48	0	0	635	Neotropic	{"type":"MultiPoint","coordinates":[]}	0	0	0	0	0	0
347	Tropical & Subtropical Dry Broadleaf Forests	2	NO02	546	Sinï¿½ Valley dry forests	2.48	0	0	636	Neotropic	{"type":"MultiPoint","coordinates":[]}	0	0	0	0	0	0
348	Tropical & Subtropical Dry Broadleaf Forests	2	NO02	547	Southern Pacific dry forests	2.48	0	0	686	Neotropic	{"type":"MultiPoint","coordinates":[]}	0	0	0	0	0	0
349	Tropical & Subtropical Dry Broadleaf Forests	2	NO02	548	Trinidad and Tobago dry forest	2.48	0	0	843	Neotropic	{"type":"MultiPoint","coordinates":[]}	0	0	0	0	0	0
0000000000000000034a	Tropical & Subtropical Dry Broadleaf Forests	2	NO02	549	Tumbes-Piura dry forests	2.48	0	0	759	Neotropic	{"type":"MultiPoint","coordinates":[]}	0	0	0	0	0	0
0000000000000000034b	Tropical & Subtropical Dry Broadleaf Forests	2	NO02	550	Veracruz dry forests	2.48	0	0	771	Neotropic	{"type":"MultiPoint","coordinates":[]}	0	0	0	0	0	0
0000000000000000034c	Tropical & Subtropical Dry Broadleaf Forests	2	NO02	551	Yucatï¿½n dry forests	2.48	0	0	809	Neotropic	{"type":"MultiPoint","coordinates":[]}	0	0	0	0	0	0
0000000000000000034d	Tropical & Subtropical Dry Broadleaf Forests	2	NO02	635	Fiji tropical dry forests	2.48	0	0	267	Oceania	{"type":"MultiPoint","coordinates":[]}	0	0	0	0	0	0
0000000000000000034e	Tropical & Subtropical Dry Broadleaf Forests	2	NO02	636	Hawai'i tropical dry forests	2.48	0	0	305	Oceania	{"type":"MultiPoint","coordinates":[]}	0	0	0	0	0	0
2	Tropical & Subtropical Coniferous Forests	3	NO03	552	Bahamian pineyards	2.48	0	0	833	Neotropic	{"type":"MultiPoint","coordinates":[]}	0	0	0	0	0	0
3	Tropical & Subtropical Coniferous Forests	3	NO03	553	Central American pine-oak forests	2.48	0	0	122	Neotropic	{"type":"MultiPoint","coordinates":[]}	0	0	0	0	0	0
4	Tropical & Subtropical Coniferous Forests	3	NO03	554	Cuban pine forests	2.48	0	0	195	Neotropic	{"type":"MultiPoint","coordinates":[]}	0	0	0	0	0	0
5	Tropical & Subtropical Coniferous Forests	3	NO03	555	Hispaniolan pine forests	2.48	0	0	319	Neotropic	{"type":"MultiPoint","coordinates":[]}	0	0	0	0	0	0
6	Tropical & Subtropical Coniferous Forests	3	NO03	556	Sierra de la Laguna pine-oak forests	2.48	0	0	626	Neotropic	{"type":"MultiPoint","coordinates":[]}	0	0	0	0	0	0
7	Tropical & Subtropical Coniferous Forests	3	NO03	557	Sierra Madre de Oaxaca pine-oak forests	2.48	0	0	629	Neotropic	{"type":"MultiPoint","coordinates":[]}	0	0	0	0	0	0
8	Tropical & Subtropical Coniferous Forests	3	NO03	558	Sierra Madre del Sur pine-oak forests	2.48	0	0	630	Neotropic	{"type":"MultiPoint","coordinates":[]}	0	0	0	0	0	0
9	Tropical & Subtropical Coniferous Forests	3	NO03	559	Trans-Mexican Volcanic Belt pine-oak forests	2.48	0	0	751	Neotropic	{"type":"MultiPoint","coordinates":[]}	0	0	0	0	0	0
253	Tropical & Subtropical Coniferous Forests	3	IN03	303	Luzon tropical pine forests	2.48	0	2.48	398	Indomalayan	{"type":"MultiPoint","coordinates":[]}	0	0	0	0	0	0
254	Tropical & Subtropical Coniferous Forests	3	IN03	304	Northeast India-Myanmar pine forests	2.48	0	2.48	497	Indomalayan	{"type":"MultiPoint","coordinates":[]}	0	0	0	0	0	0
0000000000000000026a	Tropical & Subtropical Coniferous Forests	3	NE03	325	Bermuda subtropical conifer forests	2.48	0	0	72	Nearctic	{"type":"MultiPoint","coordinates":[]}	0	0	0	0	0	0
0000000000000000026b	Tropical & Subtropical Coniferous Forests	3	NE03	326	Sierra Madre Occidental pine-oak forests	2.48	0	0	631	Nearctic	{"type":"MultiPoint","coordinates":[]}	0	0	0	0	0	0
0000000000000000026c	Tropical & Subtropical Coniferous Forests	3	NE03	327	Sierra Madre Oriental pine-oak forests	2.48	0	0	632	Nearctic	{"type":"MultiPoint","coordinates":[]}	0	0	0	0	0	0
0000000000000000000a	Temperate Broadleaf & Mixed Forests	4	NO04	560	Juan Fernï¿½ndez Islands temperate forests	0.38	0	0	356	Neotropic	{"type":"MultiPoint","coordinates":[]}	0	0	0	0	0	0
0000000000000000000b	Temperate Broadleaf & Mixed Forests	4	NO04	561	Magellanic subpolar forests	0.38	0	0	411	Neotropic	{"type":"MultiPoint","coordinates":[]}	0	0	0	0	0	0
0000000000000000000c	Temperate Broadleaf & Mixed Forests	4	NO04	562	San Fï¿½lix-San Ambrosio Islands temperate forests	0.38	0	0	605	Neotropic	{"type":"MultiPoint","coordinates":[]}	0	0	0	0	0	0
0000000000000000000d	Temperate Broadleaf & Mixed Forests	4	NO04	563	Valdivian temperate forests	0.38	0	0	768	Neotropic	{"type":"MultiPoint","coordinates":[]}	0	0	0	0	0	0
0000000000000000005a	Temperate Broadleaf & Mixed Forests	4	PA04	644	Appenine deciduous montane forests	0.38	0	0.38	36	Palearctic	{"type":"MultiPoint","coordinates":[]}	0	0	0	0	0	0
0000000000000000005b	Temperate Broadleaf & Mixed Forests	4	PA04	645	Azores temperate mixed forests	0.38	0	0.38	55	Palearctic	{"type":"MultiPoint","coordinates":[]}	0	0	0	0	0	0
0000000000000000005c	Temperate Broadleaf & Mixed Forests	4	PA04	646	Balkan mixed forests	0.38	0	0.38	62	Palearctic	{"type":"MultiPoint","coordinates":[]}	0	0	0	0	0	0
0000000000000000005d	Temperate Broadleaf & Mixed Forests	4	PA04	647	Baltic mixed forests	0.38	0	0.38	64	Palearctic	{"type":"MultiPoint","coordinates":[]}	0	0	0	0	0	0
0000000000000000005e	Temperate Broadleaf & Mixed Forests	4	PA04	648	Cantabrian mixed forests	0.38	0	0.38	98	Palearctic	{"type":"MultiPoint","coordinates":[]}	0	0	0	0	0	0
0000000000000000005f	Temperate Broadleaf & Mixed Forests	4	PA04	649	Caspian Hyrcanian mixed forests	0.38	0	0.38	109	Palearctic	{"type":"MultiPoint","coordinates":[]}	0	0	0	0	0	0
60	Temperate Broadleaf & Mixed Forests	4	PA04	650	Caucasus mixed forests	0.38	0	0.38	114	Palearctic	{"type":"MultiPoint","coordinates":[]}	0	0	0	0	0	0
61	Temperate Broadleaf & Mixed Forests	4	PA04	651	Celtic broadleaf forests	0.38	0	0.38	116	Palearctic	{"type":"MultiPoint","coordinates":[]}	0	0	0	0	0	0
62	Temperate Broadleaf & Mixed Forests	4	PA04	652	Central Anatolian steppe and woodlands	0.38	0	0.38	124	Palearctic	{"type":"MultiPoint","coordinates":[]}	0	0	0	0	0	0
63	Temperate Broadleaf & Mixed Forests	4	PA04	653	Central China Loess Plateau mixed forests	0.38	0	0.38	136	Palearctic	{"type":"MultiPoint","coordinates":[]}	0	0	0	0	0	0
64	Temperate Broadleaf & Mixed Forests	4	PA04	654	Central European mixed forests	0.38	0	0.38	139	Palearctic	{"type":"MultiPoint","coordinates":[]}	0	0	0	0	0	0
65	Temperate Broadleaf & Mixed Forests	4	PA04	655	Central Korean deciduous forests	0.38	0	0.38	142	Palearctic	{"type":"MultiPoint","coordinates":[]}	0	0	0	0	0	0
66	Temperate Broadleaf & Mixed Forests	4	PA04	656	Changbai Mountains mixed forests	0.38	0	0.38	155	Palearctic	{"type":"MultiPoint","coordinates":[]}	0	0	0	0	0	0
67	Temperate Broadleaf & Mixed Forests	4	PA04	657	Changjiang Plain evergreen forests	0.38	0	0.38	156	Palearctic	{"type":"MultiPoint","coordinates":[]}	0	0	0	0	0	0
68	Temperate Broadleaf & Mixed Forests	4	PA04	658	Crimean Submediterranean forest complex	0.38	0	0.38	188	Palearctic	{"type":"MultiPoint","coordinates":[]}	0	0	0	0	0	0
69	Temperate Broadleaf & Mixed Forests	4	PA04	659	Daba Mountains evergreen forests	0.38	0	0.38	199	Palearctic	{"type":"MultiPoint","coordinates":[]}	0	0	0	0	0	0
0000000000000000006a	Temperate Broadleaf & Mixed Forests	4	PA04	660	Dinaric Mountains mixed forests	0.38	0	0.38	203	Palearctic	{"type":"MultiPoint","coordinates":[]}	0	0	0	0	0	0
0000000000000000006b	Temperate Broadleaf & Mixed Forests	4	PA04	661	East European forest steppe	0.38	0	0.38	217	Palearctic	{"type":"MultiPoint","coordinates":[]}	0	0	0	0	0	0
0000000000000000006c	Temperate Broadleaf & Mixed Forests	4	PA04	662	Eastern Anatolian deciduous forests	0.38	0	0.38	222	Palearctic	{"type":"MultiPoint","coordinates":[]}	0	0	0	0	0	0
0000000000000000006d	Temperate Broadleaf & Mixed Forests	4	PA04	663	English Lowlands beech forests	0.38	0	0.38	253	Palearctic	{"type":"MultiPoint","coordinates":[]}	0	0	0	0	0	0
0000000000000000006e	Temperate Broadleaf & Mixed Forests	4	PA04	664	European Atlantic mixed forests	0.38	0	0.38	52	Palearctic	{"type":"MultiPoint","coordinates":[]}	0	0	0	0	0	0
0000000000000000006f	Temperate Broadleaf & Mixed Forests	4	PA04	665	Euxine-Colchic broadleaf forests	0.38	0	0.38	262	Palearctic	{"type":"MultiPoint","coordinates":[]}	0	0	0	0	0	0
70	Temperate Broadleaf & Mixed Forests	4	PA04	666	Hokkaido deciduous forests	0.38	0	0.38	321	Palearctic	{"type":"MultiPoint","coordinates":[]}	0	0	0	0	0	0
71	Temperate Broadleaf & Mixed Forests	4	PA04	667	Huang He Plain mixed forests	0.38	0	0.38	325	Palearctic	{"type":"MultiPoint","coordinates":[]}	0	0	0	0	0	0
72	Temperate Broadleaf & Mixed Forests	4	PA04	668	Madeira evergreen forests	0.38	0	0.38	407	Palearctic	{"type":"MultiPoint","coordinates":[]}	0	0	0	0	0	0
74	Temperate Broadleaf & Mixed Forests	4	PA04	670	Nihonkai evergreen forests	0.38	0	0.38	481	Palearctic	{"type":"MultiPoint","coordinates":[]}	0	0	0	0	0	0
75	Temperate Broadleaf & Mixed Forests	4	PA04	671	Nihonkai montane deciduous forests	0.38	0	0.38	482	Palearctic	{"type":"MultiPoint","coordinates":[]}	0	0	0	0	0	0
76	Temperate Broadleaf & Mixed Forests	4	PA04	672	North Atlantic moist mixed forests	0.38	0	0.38	845	Palearctic	{"type":"MultiPoint","coordinates":[]}	0	0	0	0	0	0
77	Temperate Broadleaf & Mixed Forests	4	PA04	673	Northeast China Plain deciduous forests	0.38	0	0.38	496	Palearctic	{"type":"MultiPoint","coordinates":[]}	0	0	0	0	0	0
78	Temperate Broadleaf & Mixed Forests	4	PA04	674	Pannonian mixed forests	0.38	0	0.38	554	Palearctic	{"type":"MultiPoint","coordinates":[]}	0	0	0	0	0	0
79	Temperate Broadleaf & Mixed Forests	4	PA04	675	Po Basin mixed forests	0.38	0	0.38	573	Palearctic	{"type":"MultiPoint","coordinates":[]}	0	0	0	0	0	0
0000000000000000007a	Temperate Broadleaf & Mixed Forests	4	PA04	676	Pyrenees conifer and mixed forests	0.38	0	0.38	581	Palearctic	{"type":"MultiPoint","coordinates":[]}	0	0	0	0	0	0
0000000000000000007b	Temperate Broadleaf & Mixed Forests	4	PA04	677	Qin Ling Mountains deciduous forests	0.38	0	0.38	585	Palearctic	{"type":"MultiPoint","coordinates":[]}	0	0	0	0	0	0
0000000000000000007c	Temperate Broadleaf & Mixed Forests	4	PA04	678	Rodope montane mixed forests	0.38	0	0.38	599	Palearctic	{"type":"MultiPoint","coordinates":[]}	0	0	0	0	0	0
0000000000000000007d	Temperate Broadleaf & Mixed Forests	4	PA04	679	Sarmatic mixed forests	0.38	0	0.38	611	Palearctic	{"type":"MultiPoint","coordinates":[]}	0	0	0	0	0	0
0000000000000000007e	Temperate Broadleaf & Mixed Forests	4	PA04	680	Sichuan Basin evergreen broadleaf forests	0.38	0	0.38	624	Palearctic	{"type":"MultiPoint","coordinates":[]}	0	0	0	0	0	0
0000000000000000007f	Temperate Broadleaf & Mixed Forests	4	PA04	681	Southern Korea evergreen forests	0.38	0	0.38	682	Palearctic	{"type":"MultiPoint","coordinates":[]}	0	0	0	0	0	0
80	Temperate Broadleaf & Mixed Forests	4	PA04	682	Taiheiyo evergreen forests	0.38	0	0.38	719	Palearctic	{"type":"MultiPoint","coordinates":[]}	0	0	0	0	0	0
81	Temperate Broadleaf & Mixed Forests	4	PA04	683	Taiheiyo montane deciduous forests	0.38	0	0.38	720	Palearctic	{"type":"MultiPoint","coordinates":[]}	0	0	0	0	0	0
82	Temperate Broadleaf & Mixed Forests	4	PA04	684	Tarim Basin deciduous forests and steppe	0.38	0	0.38	728	Palearctic	{"type":"MultiPoint","coordinates":[]}	0	0	0	0	0	0
84	Temperate Broadleaf & Mixed Forests	4	PA04	686	Western European broadleaf forests	0.38	0	0.38	786	Palearctic	{"type":"MultiPoint","coordinates":[]}	0	0	0	0	0	0
85	Temperate Broadleaf & Mixed Forests	4	PA04	687	Western Siberian hemiboreal forests	0.38	0	0.38	797	Palearctic	{"type":"MultiPoint","coordinates":[]}	0	0	0	0	0	0
86	Temperate Broadleaf & Mixed Forests	4	PA04	688	Zagros Mountains forest steppe	0.38	0	0.38	812	Palearctic	{"type":"MultiPoint","coordinates":[]}	0	0	0	0	0	0
000000000000000001cb	Temperate Broadleaf & Mixed Forests	4	AU04	167	Chatham Island temperate forests	0.38	0	0	159	Australasia	{"type":"MultiPoint","coordinates":[]}	0	0	0	0	0	0
000000000000000001cc	Temperate Broadleaf & Mixed Forests	4	AU04	168	Eastern Australian temperate forests	0.38	0	0	226	Australasia	{"type":"MultiPoint","coordinates":[]}	0	0	0	0	0	0
000000000000000001cd	Temperate Broadleaf & Mixed Forests	4	AU04	169	Fiordland temperate forests	0.38	0	0	269	Australasia	{"type":"MultiPoint","coordinates":[]}	0	0	0	0	0	0
000000000000000001ce	Temperate Broadleaf & Mixed Forests	4	AU04	170	Nelson Coast temperate forests	0.38	0	0	470	Australasia	{"type":"MultiPoint","coordinates":[]}	0	0	0	0	0	0
000000000000000001cf	Temperate Broadleaf & Mixed Forests	4	AU04	171	New Zealand North Island temperate forests	0.38	0	0	489	Australasia	{"type":"MultiPoint","coordinates":[]}	0	0	0	0	0	0
000000000000000001d0	Temperate Broadleaf & Mixed Forests	4	AU04	172	New Zealand South Island temperate forests	0.38	0	0	654	Australasia	{"type":"MultiPoint","coordinates":[]}	0	0	0	0	0	0
000000000000000001d1	Temperate Broadleaf & Mixed Forests	4	AU04	173	Northland temperate kauri forests	0.38	0	0	525	Australasia	{"type":"MultiPoint","coordinates":[]}	0	0	0	0	0	0
000000000000000001d2	Temperate Broadleaf & Mixed Forests	4	AU04	174	Rakiura Island temperate forests	0.38	0	0	588	Australasia	{"type":"MultiPoint","coordinates":[]}	0	0	0	0	0	0
000000000000000001d3	Temperate Broadleaf & Mixed Forests	4	AU04	175	Richmond temperate forests	0.38	0	0	597	Australasia	{"type":"MultiPoint","coordinates":[]}	0	0	0	0	0	0
000000000000000001d4	Temperate Broadleaf & Mixed Forests	4	AU04	176	Southeast Australia temperate forests	0.38	0	0	662	Australasia	{"type":"MultiPoint","coordinates":[]}	0	0	0	0	0	0
000000000000000001d5	Temperate Broadleaf & Mixed Forests	4	AU04	177	Tasmanian Central Highland forests	0.38	0	0	729	Australasia	{"type":"MultiPoint","coordinates":[]}	0	0	0	0	0	0
000000000000000001d6	Temperate Broadleaf & Mixed Forests	4	AU04	178	Tasmanian temperate forests	0.38	0	0	730	Australasia	{"type":"MultiPoint","coordinates":[]}	0	0	0	0	0	0
000000000000000001d7	Temperate Broadleaf & Mixed Forests	4	AU04	179	Tasmanian temperate rain forests	0.38	0	0	731	Australasia	{"type":"MultiPoint","coordinates":[]}	0	0	0	0	0	0
000000000000000001d8	Temperate Broadleaf & Mixed Forests	4	AU04	180	Westland temperate forests	0.38	0	0	798	Australasia	{"type":"MultiPoint","coordinates":[]}	0	0	0	0	0	0
257	Temperate Broadleaf & Mixed Forests	4	IN04	307	Northern Triangle temperate forests	0.38	0	0.9	523	Indomalayan	{"type":"MultiPoint","coordinates":[]}	0	0	0	0	0	0
258	Temperate Broadleaf & Mixed Forests	4	IN04	308	Western Himalayan broadleaf forests	0.38	0	0.9	791	Indomalayan	{"type":"MultiPoint","coordinates":[]}	0	0	0	0	0	0
0000000000000000026d	Temperate Broadleaf & Mixed Forests	4	NE04	328	Allegheny Highlands forests	0.38	0	0	17	Nearctic	{"type":"MultiPoint","coordinates":[]}	0	0	0	0	0	0
0000000000000000026e	Temperate Broadleaf & Mixed Forests	4	NE04	329	Appalachian mixed mesophytic forests	0.38	0	0	34	Nearctic	{"type":"MultiPoint","coordinates":[]}	0	0	0	0	0	0
0000000000000000026f	Temperate Broadleaf & Mixed Forests	4	NE04	330	Appalachian Piedmont forests	0.38	0	0	35	Nearctic	{"type":"MultiPoint","coordinates":[]}	0	0	0	0	0	0
270	Temperate Broadleaf & Mixed Forests	4	NE04	331	Appalachian-Blue Ridge forests	0.38	0	0	33	Nearctic	{"type":"MultiPoint","coordinates":[]}	0	0	0	0	0	0
271	Temperate Broadleaf & Mixed Forests	4	NE04	332	East Central Texas forests	0.38	0	0	215	Nearctic	{"type":"MultiPoint","coordinates":[]}	0	0	0	0	0	0
272	Temperate Broadleaf & Mixed Forests	4	NE04	333	Eastern Canadian Forest-Boreal transition	0.38	0	0	232	Nearctic	{"type":"MultiPoint","coordinates":[]}	0	0	0	0	0	0
273	Temperate Broadleaf & Mixed Forests	4	NE04	334	Eastern Great Lakes lowland forests	0.38	0	0	234	Nearctic	{"type":"MultiPoint","coordinates":[]}	0	0	0	0	0	0
274	Temperate Broadleaf & Mixed Forests	4	NE04	335	Gulf of St. Lawrence lowland forests	0.38	0	0	300	Nearctic	{"type":"MultiPoint","coordinates":[]}	0	0	0	0	0	0
275	Temperate Broadleaf & Mixed Forests	4	NE04	336	Interior Plateau US Hardwood Forests	0.38	0	0	338	Nearctic	{"type":"MultiPoint","coordinates":[]}	0	0	0	0	0	0
276	Temperate Broadleaf & Mixed Forests	4	NE04	337	Mississippi lowland forests	0.38	0	0	446	Nearctic	{"type":"MultiPoint","coordinates":[]}	0	0	0	0	0	0
277	Temperate Broadleaf & Mixed Forests	4	NE04	338	New England-Acadian forests	0.38	0	0	476	Nearctic	{"type":"MultiPoint","coordinates":[]}	0	0	0	0	0	0
278	Temperate Broadleaf & Mixed Forests	4	NE04	339	Northeast US Coastal forests	0.38	0	0	504	Nearctic	{"type":"MultiPoint","coordinates":[]}	0	0	0	0	0	0
279	Temperate Broadleaf & Mixed Forests	4	NE04	340	Ozark Highlands mixed forests	0.38	0	0	546	Nearctic	{"type":"MultiPoint","coordinates":[]}	0	0	0	0	0	0
0000000000000000027a	Temperate Broadleaf & Mixed Forests	4	NE04	341	Ozark Mountain forests	0.38	0	0	547	Nearctic	{"type":"MultiPoint","coordinates":[]}	0	0	0	0	0	0
0000000000000000027b	Temperate Broadleaf & Mixed Forests	4	NE04	342	Southern Great Lakes forests	0.38	0	0	679	Nearctic	{"type":"MultiPoint","coordinates":[]}	0	0	0	0	0	0
0000000000000000027c	Temperate Broadleaf & Mixed Forests	4	NE04	343	Upper Midwest US forest-savanna transition	0.38	0	0	764	Nearctic	{"type":"MultiPoint","coordinates":[]}	0	0	0	0	0	0
0000000000000000027d	Temperate Broadleaf & Mixed Forests	4	NE04	344	Western Great Lakes forests	0.38	0	0	787	Nearctic	{"type":"MultiPoint","coordinates":[]}	0	0	0	0	0	0
28	Montane Grasslands & Shrublands	10	NO10	587	Central Andean dry puna	2.09	0	0	127	Neotropic	{"type":"MultiPoint","coordinates":[]}	0	0	0	0	0	0
29	Montane Grasslands & Shrublands	10	NO10	588	Central Andean puna	2.09	0	0	128	Neotropic	{"type":"MultiPoint","coordinates":[]}	0	0	0	0	0	0
0000000000000000002a	Montane Grasslands & Shrublands	10	NO10	589	Central Andean wet puna	2.09	0	0	129	Neotropic	{"type":"MultiPoint","coordinates":[]}	0	0	0	0	0	0
0000000000000000002b	Montane Grasslands & Shrublands	10	NO10	590	Cordillera Central pï¿½ramo	2.09	0	0	181	Neotropic	{"type":"MultiPoint","coordinates":[]}	0	0	0	0	0	0
0000000000000000002c	Montane Grasslands & Shrublands	10	NO10	591	Cordillera de Merida pï¿½ramo	2.09	0	0	182	Neotropic	{"type":"MultiPoint","coordinates":[]}	0	0	0	0	0	0
0000000000000000002d	Montane Grasslands & Shrublands	10	NO10	592	High Monte	2.09	0	0	312	Neotropic	{"type":"MultiPoint","coordinates":[]}	0	0	0	0	0	0
0000000000000000002e	Montane Grasslands & Shrublands	10	NO10	593	Northern Andean pï¿½ramo	2.09	0	0	507	Neotropic	{"type":"MultiPoint","coordinates":[]}	0	0	0	0	0	0
0000000000000000002f	Montane Grasslands & Shrublands	10	NO10	594	Santa Marta pï¿½ramo	2.09	0	0	609	Neotropic	{"type":"MultiPoint","coordinates":[]}	0	0	0	0	0	0
30	Montane Grasslands & Shrublands	10	NO10	595	Southern Andean steppe	2.09	0	0	673	Neotropic	{"type":"MultiPoint","coordinates":[]}	0	0	0	0	0	0
000000000000000000c3	Montane Grasslands & Shrublands	10	PA10	749	Altai alpine meadow and tundra	2.09	0	2.09	19	Palearctic	{"type":"MultiPoint","coordinates":[]}	0	0	0	0	0	0
000000000000000000c4	Montane Grasslands & Shrublands	10	PA10	750	Central Tibetan Plateau alpine steppe	2.09	0	2.09	152	Palearctic	{"type":"MultiPoint","coordinates":[]}	0	0	0	0	0	0
000000000000000000c6	Montane Grasslands & Shrublands	10	PA10	752	Ghorat-Hazarajat alpine meadow	2.09	0	2.09	276	Palearctic	{"type":"MultiPoint","coordinates":[]}	0	0	0	0	0	0
000000000000000000c7	Montane Grasslands & Shrublands	10	PA10	753	Hindu Kush alpine meadow	2.09	0	2.09	316	Palearctic	{"type":"MultiPoint","coordinates":[]}	0	0	0	0	0	0
000000000000000000c8	Montane Grasslands & Shrublands	10	PA10	754	Karakoram-West Tibetan Plateau alpine steppe	2.09	0	2.09	365	Palearctic	{"type":"MultiPoint","coordinates":[]}	0	0	0	0	0	0
000000000000000000c9	Montane Grasslands & Shrublands	10	PA10	755	Khangai Mountains alpine meadow	2.09	0	2.09	372	Palearctic	{"type":"MultiPoint","coordinates":[]}	0	0	0	0	0	0
000000000000000000ca	Montane Grasslands & Shrublands	10	PA10	756	Kopet Dag woodlands and forest steppe	2.09	0	2.09	381	Palearctic	{"type":"MultiPoint","coordinates":[]}	0	0	0	0	0	0
000000000000000000cb	Montane Grasslands & Shrublands	10	PA10	757	Kuh Rud and Eastern Iran montane woodlands	2.09	0	2.09	382	Palearctic	{"type":"MultiPoint","coordinates":[]}	0	0	0	0	0	0
000000000000000000cc	Montane Grasslands & Shrublands	10	PA10	758	Mediterranean High Atlas juniper steppe	2.09	0	2.09	431	Palearctic	{"type":"MultiPoint","coordinates":[]}	0	0	0	0	0	0
000000000000000000cd	Montane Grasslands & Shrublands	10	PA10	759	North Tibetan Plateau-Kunlun Mountains alpine desert	2.09	0	2.09	492	Palearctic	{"type":"MultiPoint","coordinates":[]}	0	0	0	0	0	0
000000000000000000ce	Montane Grasslands & Shrublands	10	PA10	760	Northwestern Himalayan alpine shrub and meadows	2.09	0	2.09	531	Palearctic	{"type":"MultiPoint","coordinates":[]}	0	0	0	0	0	0
000000000000000000cf	Montane Grasslands & Shrublands	10	PA10	761	Ordos Plateau steppe	2.09	0	2.09	542	Palearctic	{"type":"MultiPoint","coordinates":[]}	0	0	0	0	0	0
000000000000000000d0	Montane Grasslands & Shrublands	10	PA10	762	Pamir alpine desert and tundra	2.09	0	2.09	552	Palearctic	{"type":"MultiPoint","coordinates":[]}	0	0	0	0	0	0
000000000000000000d1	Montane Grasslands & Shrublands	10	PA10	763	Qilian Mountains subalpine meadows	2.09	0	2.09	584	Palearctic	{"type":"MultiPoint","coordinates":[]}	0	0	0	0	0	0
000000000000000000d2	Montane Grasslands & Shrublands	10	PA10	764	Sayan alpine meadows and tundra	2.09	0	2.09	612	Palearctic	{"type":"MultiPoint","coordinates":[]}	0	0	0	0	0	0
000000000000000000d3	Montane Grasslands & Shrublands	10	PA10	765	Southeast Tibet shrublands and meadows	2.09	0	2.09	664	Palearctic	{"type":"MultiPoint","coordinates":[]}	0	0	0	0	0	0
000000000000000000d4	Montane Grasslands & Shrublands	10	PA10	766	Sulaiman Range alpine meadows	2.09	0	2.09	704	Palearctic	{"type":"MultiPoint","coordinates":[]}	0	0	0	0	0	0
000000000000000000d5	Montane Grasslands & Shrublands	10	PA10	767	Tian Shan montane steppe and meadows	2.09	0	2.09	739	Palearctic	{"type":"MultiPoint","coordinates":[]}	0	0	0	0	0	0
000000000000000000d6	Montane Grasslands & Shrublands	10	PA10	768	Tibetan Plateau alpine shrublands and meadows	2.09	0	2.09	741	Palearctic	{"type":"MultiPoint","coordinates":[]}	0	0	0	0	0	0
000000000000000000d7	Montane Grasslands & Shrublands	10	PA10	769	Western Himalayan alpine shrub and meadows	2.09	0	2.09	790	Palearctic	{"type":"MultiPoint","coordinates":[]}	0	0	0	0	0	0
000000000000000000d8	Montane Grasslands & Shrublands	10	PA10	770	Yarlung Zanbo arid steppe	2.09	0	2.09	807	Palearctic	{"type":"MultiPoint","coordinates":[]}	0	0	0	0	0	0
172	Montane Grasslands & Shrublands	10	AF10	77	Angolan montane forest-grassland	2.09	0	0	28	Afrotropic	{"type":"MultiPoint","coordinates":[]}	0	0	0	0	0	0
173	Montane Grasslands & Shrublands	10	AF10	78	East African montane moorlands	2.09	0	0	825	Afrotropic	{"type":"MultiPoint","coordinates":[]}	0	0	0	0	0	0
174	Montane Grasslands & Shrublands	10	AF10	79	Ethiopian montane grasslands and woodlands	2.09	0	0	259	Afrotropic	{"type":"MultiPoint","coordinates":[]}	0	0	0	0	0	0
175	Montane Grasslands & Shrublands	10	AF10	80	Ethiopian montane moorlands	2.09	0	0	260	Afrotropic	{"type":"MultiPoint","coordinates":[]}	0	0	0	0	0	0
176	Montane Grasslands & Shrublands	10	AF10	81	Highveld grasslands	2.09	0	0	313	Afrotropic	{"type":"MultiPoint","coordinates":[]}	0	0	0	0	0	0
177	Montane Grasslands & Shrublands	10	AF10	82	Jos Plateau forest-grassland	2.09	0	0	355	Afrotropic	{"type":"MultiPoint","coordinates":[]}	0	0	0	0	0	0
178	Montane Grasslands & Shrublands	10	AF10	83	Madagascar ericoid thickets	2.09	0	0	400	Afrotropic	{"type":"MultiPoint","coordinates":[]}	0	0	0	0	0	0
179	Montane Grasslands & Shrublands	10	AF10	84	Mulanje Montane forest-grassland	2.09	0	0	455	Afrotropic	{"type":"MultiPoint","coordinates":[]}	0	0	0	0	0	0
0000000000000000017a	Montane Grasslands & Shrublands	10	AF10	85	Nyanga-Chimanimani Montane forest-grassland	2.09	0	0	536	Afrotropic	{"type":"MultiPoint","coordinates":[]}	0	0	0	0	0	0
0000000000000000017b	Montane Grasslands & Shrublands	10	AF10	86	Rwenzori-Virunga montane moorlands	2.09	0	0	600	Afrotropic	{"type":"MultiPoint","coordinates":[]}	0	0	0	0	0	0
0000000000000000017c	Montane Grasslands & Shrublands	10	AF10	87	Southern Rift Montane forest-grassland	2.09	0	0	687	Afrotropic	{"type":"MultiPoint","coordinates":[]}	0	0	0	0	0	0
100000	Montane Grasslands & Shrublands	10	AU10	193	Australian Alps montane grasslands	2.09	0	0	53	Australasia	{"type":"MultiPoint","coordinates":[]}	0	0	0	0	0	0
1000000	Montane Grasslands & Shrublands	10	AU10	194	New Zealand South Island montane grasslands	2.09	0	0	653	Australasia	{"type":"MultiPoint","coordinates":[]}	0	0	0	0	0	0
10000000	Montane Grasslands & Shrublands	10	AU10	195	Papuan Central Range sub-alpine grasslands	2.09	0	0	148	Australasia	{"type":"MultiPoint","coordinates":[]}	0	0	0	0	0	0
0000000000000000025d	Montane Grasslands & Shrublands	10	IN10	313	Kinabalu montane alpine meadows	2.09	0	2.09	376	Indomalayan	{"type":"MultiPoint","coordinates":[]}	0	0	0	0	0	0
87	Temperate Conifer Forests	5	PA05	689	Alps conifer and mixed forests	0.24	0	0	18	Palearctic	{"type":"MultiPoint","coordinates":[]}	0	0	0	0	0	0
88	Temperate Conifer Forests	5	PA05	690	Altai montane forest and forest steppe	0.24	0	0	20	Palearctic	{"type":"MultiPoint","coordinates":[]}	0	0	0	0	0	0
89	Temperate Conifer Forests	5	PA05	691	Caledon conifer forests	0.24	0	0	88	Palearctic	{"type":"MultiPoint","coordinates":[]}	0	0	0	0	0	0
0000000000000000008a	Temperate Conifer Forests	5	PA05	692	Carpathian montane forests	0.24	0	0	107	Palearctic	{"type":"MultiPoint","coordinates":[]}	0	0	0	0	0	0
0000000000000000008b	Temperate Conifer Forests	5	PA05	693	Da Hinggan-Dzhagdy Mountains conifer forests	0.24	0	0	198	Palearctic	{"type":"MultiPoint","coordinates":[]}	0	0	0	0	0	0
0000000000000000008c	Temperate Conifer Forests	5	PA05	694	East Afghan montane conifer forests	0.24	0	0	209	Palearctic	{"type":"MultiPoint","coordinates":[]}	0	0	0	0	0	0
0000000000000000008d	Temperate Conifer Forests	5	PA05	695	Elburz Range forest steppe	0.24	0	0	248	Palearctic	{"type":"MultiPoint","coordinates":[]}	0	0	0	0	0	0
0000000000000000008e	Temperate Conifer Forests	5	PA05	696	Helanshan montane conifer forests	0.24	0	0	309	Palearctic	{"type":"MultiPoint","coordinates":[]}	0	0	0	0	0	0
0000000000000000008f	Temperate Conifer Forests	5	PA05	697	Hengduan Mountains subalpine conifer forests	0.24	0	0	310	Palearctic	{"type":"MultiPoint","coordinates":[]}	0	0	0	0	0	0
90	Temperate Conifer Forests	5	PA05	698	Hokkaido montane conifer forests	0.24	0	0	322	Palearctic	{"type":"MultiPoint","coordinates":[]}	0	0	0	0	0	0
91	Temperate Conifer Forests	5	PA05	699	Honshu alpine conifer forests	0.24	0	0	323	Palearctic	{"type":"MultiPoint","coordinates":[]}	0	0	0	0	0	0
92	Temperate Conifer Forests	5	PA05	700	Khangai Mountains conifer forests	0.24	0	0	373	Palearctic	{"type":"MultiPoint","coordinates":[]}	0	0	0	0	0	0
93	Temperate Conifer Forests	5	PA05	701	Mediterranean conifer and mixed forests	0.24	0	0	429	Palearctic	{"type":"MultiPoint","coordinates":[]}	0	0	0	0	0	0
94	Temperate Conifer Forests	5	PA05	702	Northeast Himalayan subalpine conifer forests	0.24	0	0	502	Palearctic	{"type":"MultiPoint","coordinates":[]}	0	0	0	0	0	0
95	Temperate Conifer Forests	5	PA05	703	Northern Anatolian conifer and deciduous forests	0.24	0	0	506	Palearctic	{"type":"MultiPoint","coordinates":[]}	0	0	0	0	0	0
96	Temperate Conifer Forests	5	PA05	704	Nujiang Langcang Gorge alpine conifer and mixed forests	0.24	0	0	534	Palearctic	{"type":"MultiPoint","coordinates":[]}	0	0	0	0	0	0
97	Temperate Conifer Forests	5	PA05	705	Qilian Mountains conifer forests	0.24	0	0	583	Palearctic	{"type":"MultiPoint","coordinates":[]}	0	0	0	0	0	0
98	Temperate Conifer Forests	5	PA05	706	Qionglai-Minshan conifer forests	0.24	0	0	586	Palearctic	{"type":"MultiPoint","coordinates":[]}	0	0	0	0	0	0
99	Temperate Conifer Forests	5	PA05	707	Sayan montane conifer forests	0.24	0	0	614	Palearctic	{"type":"MultiPoint","coordinates":[]}	0	0	0	0	0	0
0000000000000000009a	Temperate Conifer Forests	5	PA05	708	Scandinavian coastal conifer forests	0.24	0	0	616	Palearctic	{"type":"MultiPoint","coordinates":[]}	0	0	0	0	0	0
0000000000000000009b	Temperate Conifer Forests	5	PA05	709	Tian Shan montane conifer forests	0.24	0	0	738	Palearctic	{"type":"MultiPoint","coordinates":[]}	0	0	0	0	0	0
0000000000000000025a	Temperate Conifer Forests	5	IN05	310	Western Himalayan subalpine conifer forests	0.24	0	0.24	792	Indomalayan	{"type":"MultiPoint","coordinates":[]}	0	0	0	0	0	0
0000000000000000027e	Temperate Conifer Forests	5	NE05	345	Alberta-British Columbia foothills forests	0.24	0	0	13	Nearctic	{"type":"MultiPoint","coordinates":[]}	0	0	0	0	0	0
0000000000000000027f	Temperate Conifer Forests	5	NE05	346	Arizona Mountains forests	0.24	0	0	44	Nearctic	{"type":"MultiPoint","coordinates":[]}	0	0	0	0	0	0
280	Temperate Conifer Forests	5	NE05	347	Atlantic coastal pine barrens	0.24	0	0	50	Nearctic	{"type":"MultiPoint","coordinates":[]}	0	0	0	0	0	0
281	Temperate Conifer Forests	5	NE05	348	Blue Mountains forests	0.24	0	0	74	Nearctic	{"type":"MultiPoint","coordinates":[]}	0	0	0	0	0	0
282	Temperate Conifer Forests	5	NE05	349	British Columbia coastal conifer forests	0.24	0	0	83	Nearctic	{"type":"MultiPoint","coordinates":[]}	0	0	0	0	0	0
283	Temperate Conifer Forests	5	NE05	350	Central British Columbia Mountain forests	0.24	0	0	133	Nearctic	{"type":"MultiPoint","coordinates":[]}	0	0	0	0	0	0
284	Temperate Conifer Forests	5	NE05	351	Central Pacific Northwest coastal forests	0.24	0	0	144	Nearctic	{"type":"MultiPoint","coordinates":[]}	0	0	0	0	0	0
285	Temperate Conifer Forests	5	NE05	352	Central-Southern Cascades Forests	0.24	0	0	125	Nearctic	{"type":"MultiPoint","coordinates":[]}	0	0	0	0	0	0
286	Temperate Conifer Forests	5	NE05	353	Colorado Rockies forests	0.24	0	0	175	Nearctic	{"type":"MultiPoint","coordinates":[]}	0	0	0	0	0	0
287	Temperate Conifer Forests	5	NE05	354	Eastern Cascades forests	0.24	0	0	229	Nearctic	{"type":"MultiPoint","coordinates":[]}	0	0	0	0	0	0
288	Temperate Conifer Forests	5	NE05	355	Fraser Plateau and Basin conifer forests	0.24	0	0	272	Nearctic	{"type":"MultiPoint","coordinates":[]}	0	0	0	0	0	0
289	Temperate Conifer Forests	5	NE05	356	Great Basin montane forests	0.24	0	0	282	Nearctic	{"type":"MultiPoint","coordinates":[]}	0	0	0	0	0	0
0000000000000000028a	Temperate Conifer Forests	5	NE05	357	Klamath-Siskiyou forests	0.24	0	0	377	Nearctic	{"type":"MultiPoint","coordinates":[]}	0	0	0	0	0	0
0000000000000000028b	Temperate Conifer Forests	5	NE05	358	North Cascades conifer forests	0.24	0	0	838	Nearctic	{"type":"MultiPoint","coordinates":[]}	0	0	0	0	0	0
0000000000000000028c	Temperate Conifer Forests	5	NE05	359	Northern California coastal forests	0.24	0	0	509	Nearctic	{"type":"MultiPoint","coordinates":[]}	0	0	0	0	0	0
0000000000000000028d	Temperate Conifer Forests	5	NE05	360	Northern Pacific Alaskan coastal forests	0.24	0	0	827	Nearctic	{"type":"MultiPoint","coordinates":[]}	0	0	0	0	0	0
0000000000000000028e	Temperate Conifer Forests	5	NE05	361	Northern Rockies conifer forests	0.24	0	0	839	Nearctic	{"type":"MultiPoint","coordinates":[]}	0	0	0	0	0	0
0000000000000000028f	Temperate Conifer Forests	5	NE05	362	Okanogan dry forests	0.24	0	0	540	Nearctic	{"type":"MultiPoint","coordinates":[]}	0	0	0	0	0	0
290	Temperate Conifer Forests	5	NE05	363	Piney Woods	0.24	0	0	572	Nearctic	{"type":"MultiPoint","coordinates":[]}	0	0	0	0	0	0
291	Temperate Conifer Forests	5	NE05	364	Puget lowland forests	0.24	0	0	578	Nearctic	{"type":"MultiPoint","coordinates":[]}	0	0	0	0	0	0
292	Temperate Conifer Forests	5	NE05	365	Queen Charlotte Islands conifer forests	0.24	0	0	826	Nearctic	{"type":"MultiPoint","coordinates":[]}	0	0	0	0	0	0
293	Temperate Conifer Forests	5	NE05	366	Sierra Nevada forests	0.24	0	0	633	Nearctic	{"type":"MultiPoint","coordinates":[]}	0	0	0	0	0	0
294	Temperate Conifer Forests	5	NE05	367	South Central Rockies forests	0.24	0	0	648	Nearctic	{"type":"MultiPoint","coordinates":[]}	0	0	0	0	0	0
295	Temperate Conifer Forests	5	NE05	368	Wasatch and Uinta montane forests	0.24	0	0	777	Nearctic	{"type":"MultiPoint","coordinates":[]}	0	0	0	0	0	0
40	Mangroves	14	NO14	611	Amazon-Orinoco-Southern Caribbean mangroves	3.2	0	0	23	Neotropic	{"type":"MultiPoint","coordinates":[]}	0	0	0	0	0	0
41	Mangroves	14	NO14	612	Bahamian-Antillean mangroves	3.2	0	0	57	Neotropic	{"type":"MultiPoint","coordinates":[]}	0	0	0	0	0	0
42	Mangroves	14	NO14	613	Mesoamerican Gulf-Caribbean mangroves	3.2	0	0	436	Neotropic	{"type":"MultiPoint","coordinates":[]}	0	0	0	0	0	0
43	Mangroves	14	NO14	614	Northern Mesoamerican Pacific mangroves	3.2	0	0	515	Neotropic	{"type":"MultiPoint","coordinates":[]}	0	0	0	0	0	0
44	Mangroves	14	NO14	615	South American Pacific mangroves	3.2	0	0	645	Neotropic	{"type":"MultiPoint","coordinates":[]}	0	0	0	0	0	0
45	Mangroves	14	NO14	616	Southern Atlantic Brazilian mangroves	3.2	0	0	676	Neotropic	{"type":"MultiPoint","coordinates":[]}	0	0	0	0	0	0
46	Mangroves	14	NO14	617	Southern Mesoamerican Pacific mangroves	3.2	0	0	683	Neotropic	{"type":"MultiPoint","coordinates":[]}	0	0	0	0	0	0
193	Mangroves	14	AF14	111	Central African mangroves	3.2	0	0	118	Afrotropic	{"type":"MultiPoint","coordinates":[]}	0	0	0	0	0	0
194	Mangroves	14	AF14	112	East African mangroves	3.2	0	0	211	Afrotropic	{"type":"MultiPoint","coordinates":[]}	0	0	0	0	0	0
195	Mangroves	14	AF14	113	Guinean mangroves	3.2	0	0	296	Afrotropic	{"type":"MultiPoint","coordinates":[]}	0	0	0	0	0	0
196	Mangroves	14	AF14	114	Madagascar mangroves	3.2	0	0	402	Afrotropic	{"type":"MultiPoint","coordinates":[]}	0	0	0	0	0	0
197	Mangroves	14	AF14	115	Red Sea mangroves	3.2	0	0	594	Afrotropic	{"type":"MultiPoint","coordinates":[]}	0	0	0	0	0	0
198	Mangroves	14	AF14	116	Southern Africa mangroves	3.2	0	0	671	Afrotropic	{"type":"MultiPoint","coordinates":[]}	0	0	0	0	0	0
000000000000000001fd	Mangroves	14	AU14	217	New Guinea mangroves	3.2	0	0	477	Australasia	{"type":"MultiPoint","coordinates":[]}	0	0	0	0	0	0
263	Mangroves	14	IN14	319	Indochina mangroves	3.2	0	3.205	333	Indomalayan	{"type":"MultiPoint","coordinates":[]}	0	0	0	0	0	0
264	Mangroves	14	IN14	320	Indus River Delta-Arabian Sea mangroves	3.2	0	3.205	334	Indomalayan	{"type":"MultiPoint","coordinates":[]}	0	0	0	0	0	0
265	Mangroves	14	IN14	321	Myanmar Coast mangroves	3.2	0	3.205	458	Indomalayan	{"type":"MultiPoint","coordinates":[]}	0	0	0	0	0	0
266	Mangroves	14	IN14	322	Sunda Shelf mangroves	3.2	0	3.205	714	Indomalayan	{"type":"MultiPoint","coordinates":[]}	0	0	0	0	0	0
47	Tropical & Subtropical Moist Broadleaf Forests	1	OC01	618	Carolines tropical moist forests	2.51	0	0	106	Oceania	{"type":"MultiPoint","coordinates":[]}	0	0	0	0	0	0
48	Tropical & Subtropical Moist Broadleaf Forests	1	OC01	619	Central Polynesian tropical moist forests	2.51	0	0	146	Oceania	{"type":"MultiPoint","coordinates":[]}	0	0	0	0	0	0
49	Tropical & Subtropical Moist Broadleaf Forests	1	OC01	620	Cook Islands tropical moist forests	2.51	0	0	178	Oceania	{"type":"MultiPoint","coordinates":[]}	0	0	0	0	0	0
0000000000000000004a	Tropical & Subtropical Moist Broadleaf Forests	1	OC01	621	Eastern Micronesia tropical moist forests	2.51	0	0	243	Oceania	{"type":"MultiPoint","coordinates":[]}	0	0	0	0	0	0
0000000000000000004b	Tropical & Subtropical Moist Broadleaf Forests	1	OC01	622	Fiji tropical moist forests	2.51	0	0	268	Oceania	{"type":"MultiPoint","coordinates":[]}	0	0	0	0	0	0
0000000000000000004c	Tropical & Subtropical Moist Broadleaf Forests	1	OC01	623	Hawai'i tropical moist forests	2.51	0	0	308	Oceania	{"type":"MultiPoint","coordinates":[]}	0	0	0	0	0	0
0000000000000000004d	Tropical & Subtropical Moist Broadleaf Forests	1	OC01	624	Kermadec Islands subtropical moist forests	2.51	0	0	371	Oceania	{"type":"MultiPoint","coordinates":[]}	0	0	0	0	0	0
0000000000000000004e	Tropical & Subtropical Moist Broadleaf Forests	1	OC01	625	Marquesas tropical moist forests	2.51	0	0	424	Oceania	{"type":"MultiPoint","coordinates":[]}	0	0	0	0	0	0
0000000000000000004f	Tropical & Subtropical Moist Broadleaf Forests	1	OC01	626	Ogasawara subtropical moist forests	2.51	0	0	538	Oceania	{"type":"MultiPoint","coordinates":[]}	0	0	0	0	0	0
50	Tropical & Subtropical Moist Broadleaf Forests	1	OC01	627	Palau tropical moist forests	2.51	0	0	549	Oceania	{"type":"MultiPoint","coordinates":[]}	0	0	0	0	0	0
51	Tropical & Subtropical Moist Broadleaf Forests	1	OC01	628	Rapa Nui and Sala y Gï¿½mez subtropical forests	2.51	0	0	590	Oceania	{"type":"MultiPoint","coordinates":[]}	0	0	0	0	0	0
52	Tropical & Subtropical Moist Broadleaf Forests	1	OC01	629	Samoan tropical moist forests	2.51	0	0	604	Oceania	{"type":"MultiPoint","coordinates":[]}	0	0	0	0	0	0
53	Tropical & Subtropical Moist Broadleaf Forests	1	OC01	630	Society Islands tropical moist forests	2.51	0	0	638	Oceania	{"type":"MultiPoint","coordinates":[]}	0	0	0	0	0	0
54	Tropical & Subtropical Moist Broadleaf Forests	1	OC01	631	Tongan tropical moist forests	2.51	0	0	745	Oceania	{"type":"MultiPoint","coordinates":[]}	0	0	0	0	0	0
55	Tropical & Subtropical Moist Broadleaf Forests	1	OC01	632	Tuamotu tropical moist forests	2.51	0	0	757	Oceania	{"type":"MultiPoint","coordinates":[]}	0	0	0	0	0	0
56	Tropical & Subtropical Moist Broadleaf Forests	1	OC01	633	Tubuai tropical moist forests	2.51	0	0	758	Oceania	{"type":"MultiPoint","coordinates":[]}	0	0	0	0	0	0
57	Tropical & Subtropical Moist Broadleaf Forests	1	OC01	634	Western Polynesian tropical moist forests	2.51	0	0	795	Oceania	{"type":"MultiPoint","coordinates":[]}	0	0	0	0	0	0
58	Tropical & Subtropical Moist Broadleaf Forests	1	PA01	642	Guizhou Plateau broadleaf and mixed forests	2.51	0	0	298	Palearctic	{"type":"MultiPoint","coordinates":[]}	0	0	0	0	0	0
59	Tropical & Subtropical Moist Broadleaf Forests	1	PA01	643	Yunnan Plateau subtropical evergreen forests	2.51	0	0	811	Palearctic	{"type":"MultiPoint","coordinates":[]}	0	0	0	0	0	0
125	Tropical & Subtropical Moist Broadleaf Forests	1	AF01	1	Albertine Rift montane forests	2.51	0	0	14	Afrotropic	{"type":"MultiPoint","coordinates":[]}	0	0	0	0	0	0
126	Tropical & Subtropical Moist Broadleaf Forests	1	AF01	2	Cameroon Highlands forests	2.51	0	0	93	Afrotropic	{"type":"MultiPoint","coordinates":[]}	0	0	0	0	0	0
127	Tropical & Subtropical Moist Broadleaf Forests	1	AF01	3	Central Congolian lowland forests	2.51	0	0	137	Afrotropic	{"type":"MultiPoint","coordinates":[]}	0	0	0	0	0	0
128	Tropical & Subtropical Moist Broadleaf Forests	1	AF01	4	Comoros forests	2.51	0	0	176	Afrotropic	{"type":"MultiPoint","coordinates":[]}	0	0	0	0	0	0
129	Tropical & Subtropical Moist Broadleaf Forests	1	AF01	5	Congolian coastal forests	2.51	0	0	51	Afrotropic	{"type":"MultiPoint","coordinates":[]}	0	0	0	0	0	0
0000000000000000012a	Tropical & Subtropical Moist Broadleaf Forests	1	AF01	6	Cross-Niger transition forests	2.51	0	0	189	Afrotropic	{"type":"MultiPoint","coordinates":[]}	0	0	0	0	0	0
0000000000000000012b	Tropical & Subtropical Moist Broadleaf Forests	1	AF01	7	Cross-Sanaga-Bioko coastal forests	2.51	0	0	190	Afrotropic	{"type":"MultiPoint","coordinates":[]}	0	0	0	0	0	0
0000000000000000012c	Tropical & Subtropical Moist Broadleaf Forests	1	AF01	8	East African montane forests	2.51	0	0	212	Afrotropic	{"type":"MultiPoint","coordinates":[]}	0	0	0	0	0	0
0000000000000000012d	Tropical & Subtropical Moist Broadleaf Forests	1	AF01	9	Eastern Arc forests	2.51	0	0	224	Afrotropic	{"type":"MultiPoint","coordinates":[]}	0	0	0	0	0	0
0000000000000000012e	Tropical & Subtropical Moist Broadleaf Forests	1	AF01	10	Eastern Congolian swamp forests	2.51	0	0	230	Afrotropic	{"type":"MultiPoint","coordinates":[]}	0	0	0	0	0	0
0000000000000000012f	Tropical & Subtropical Moist Broadleaf Forests	1	AF01	11	Eastern Guinean forests	2.51	0	0	235	Afrotropic	{"type":"MultiPoint","coordinates":[]}	0	0	0	0	0	0
130	Tropical & Subtropical Moist Broadleaf Forests	1	AF01	12	Ethiopian montane forests	2.51	0	0	258	Afrotropic	{"type":"MultiPoint","coordinates":[]}	0	0	0	0	0	0
131	Tropical & Subtropical Moist Broadleaf Forests	1	AF01	13	Granitic Seychelles forests	2.51	0	0	281	Afrotropic	{"type":"MultiPoint","coordinates":[]}	0	0	0	0	0	0
132	Tropical & Subtropical Moist Broadleaf Forests	1	AF01	14	Guinean montane forests	2.51	0	0	297	Afrotropic	{"type":"MultiPoint","coordinates":[]}	0	0	0	0	0	0
133	Tropical & Subtropical Moist Broadleaf Forests	1	AF01	15	Knysna-Amatole montane forests	2.51	0	0	378	Afrotropic	{"type":"MultiPoint","coordinates":[]}	0	0	0	0	0	0
134	Tropical & Subtropical Moist Broadleaf Forests	1	AF01	16	Kwazulu Natal-Cape coastal forests	2.51	0	0	383	Afrotropic	{"type":"MultiPoint","coordinates":[]}	0	0	0	0	0	0
135	Tropical & Subtropical Moist Broadleaf Forests	1	AF01	17	Madagascar humid forests	2.51	0	0	401	Afrotropic	{"type":"MultiPoint","coordinates":[]}	0	0	0	0	0	0
136	Tropical & Subtropical Moist Broadleaf Forests	1	AF01	18	Madagascar subhumid forests	2.51	0	0	404	Afrotropic	{"type":"MultiPoint","coordinates":[]}	0	0	0	0	0	0
137	Tropical & Subtropical Moist Broadleaf Forests	1	AF01	19	Maputaland coastal forests and woodlands	2.51	0	0	418	Afrotropic	{"type":"MultiPoint","coordinates":[]}	0	0	0	0	0	0
138	Tropical & Subtropical Moist Broadleaf Forests	1	AF01	20	Mascarene forests	2.51	0	0	426	Afrotropic	{"type":"MultiPoint","coordinates":[]}	0	0	0	0	0	0
139	Tropical & Subtropical Moist Broadleaf Forests	1	AF01	21	Mount Cameroon and Bioko montane forests	2.51	0	0	454	Afrotropic	{"type":"MultiPoint","coordinates":[]}	0	0	0	0	0	0
0000000000000000013a	Tropical & Subtropical Moist Broadleaf Forests	1	AF01	22	Niger Delta swamp forests	2.51	0	0	479	Afrotropic	{"type":"MultiPoint","coordinates":[]}	0	0	0	0	0	0
0000000000000000013b	Tropical & Subtropical Moist Broadleaf Forests	1	AF01	23	Nigerian lowland forests	2.51	0	0	480	Afrotropic	{"type":"MultiPoint","coordinates":[]}	0	0	0	0	0	0
0000000000000000013c	Tropical & Subtropical Moist Broadleaf Forests	1	AF01	24	Northeast Congolian lowland forests	2.51	0	0	501	Afrotropic	{"type":"MultiPoint","coordinates":[]}	0	0	0	0	0	0
0000000000000000013d	Tropical & Subtropical Moist Broadleaf Forests	1	AF01	25	Northern Swahili coastal forests	2.51	0	0	519	Afrotropic	{"type":"MultiPoint","coordinates":[]}	0	0	0	0	0	0
0000000000000000013e	Tropical & Subtropical Moist Broadleaf Forests	1	AF01	26	Northwest Congolian lowland forests	2.51	0	0	529	Afrotropic	{"type":"MultiPoint","coordinates":[]}	0	0	0	0	0	0
0000000000000000013f	Tropical & Subtropical Moist Broadleaf Forests	1	AF01	27	Sï¿½o Tomï¿½, Prï¿½ncipe, and Annobï¿½n forests	2.51	0	0	610	Afrotropic	{"type":"MultiPoint","coordinates":[]}	0	0	0	0	0	0
140	Tropical & Subtropical Moist Broadleaf Forests	1	AF01	28	Southern Swahili coastal forests and woodlands	2.51	0	0	688	Afrotropic	{"type":"MultiPoint","coordinates":[]}	0	0	0	0	0	0
141	Tropical & Subtropical Moist Broadleaf Forests	1	AF01	29	Western Congolian swamp forests	2.51	0	0	784	Afrotropic	{"type":"MultiPoint","coordinates":[]}	0	0	0	0	0	0
142	Tropical & Subtropical Moist Broadleaf Forests	1	AF01	30	Western Guinean lowland forests	2.51	0	0	788	Afrotropic	{"type":"MultiPoint","coordinates":[]}	0	0	0	0	0	0
000000000000000001ab	Tropical & Subtropical Moist Broadleaf Forests	1	AU01	135	Admiralty Islands lowland rain forests	2.51	0	0	2	Australasia	{"type":"MultiPoint","coordinates":[]}	0	0	0	0	0	0
000000000000000001ac	Tropical & Subtropical Moist Broadleaf Forests	1	AU01	136	Banda Sea Islands moist deciduous forests	2.51	0	0	66	Australasia	{"type":"MultiPoint","coordinates":[]}	0	0	0	0	0	0
000000000000000001ad	Tropical & Subtropical Moist Broadleaf Forests	1	AU01	137	Biak-Numfoor rain forests	2.51	0	0	73	Australasia	{"type":"MultiPoint","coordinates":[]}	0	0	0	0	0	0
000000000000000001ae	Tropical & Subtropical Moist Broadleaf Forests	1	AU01	138	Buru rain forests	2.51	0	0	85	Australasia	{"type":"MultiPoint","coordinates":[]}	0	0	0	0	0	0
000000000000000001af	Tropical & Subtropical Moist Broadleaf Forests	1	AU01	139	Central Range Papuan montane rain forests	2.51	0	0	147	Australasia	{"type":"MultiPoint","coordinates":[]}	0	0	0	0	0	0
000000000000000001b0	Tropical & Subtropical Moist Broadleaf Forests	1	AU01	140	Halmahera rain forests	2.51	0	0	303	Australasia	{"type":"MultiPoint","coordinates":[]}	0	0	0	0	0	0
000000000000000001b1	Tropical & Subtropical Moist Broadleaf Forests	1	AU01	141	Huon Peninsula montane rain forests	2.51	0	0	328	Australasia	{"type":"MultiPoint","coordinates":[]}	0	0	0	0	0	0
000000000000000001b2	Tropical & Subtropical Moist Broadleaf Forests	1	AU01	142	Lord Howe Island subtropical forests	2.51	0	0	391	Australasia	{"type":"MultiPoint","coordinates":[]}	0	0	0	0	0	0
000000000000000001b3	Tropical & Subtropical Moist Broadleaf Forests	1	AU01	143	Louisiade Archipelago rain forests	2.51	0	0	392	Australasia	{"type":"MultiPoint","coordinates":[]}	0	0	0	0	0	0
000000000000000001b4	Tropical & Subtropical Moist Broadleaf Forests	1	AU01	144	New Britain-New Ireland lowland rain forests	2.51	0	0	472	Australasia	{"type":"MultiPoint","coordinates":[]}	0	0	0	0	0	0
000000000000000001b5	Tropical & Subtropical Moist Broadleaf Forests	1	AU01	145	New Britain-New Ireland montane rain forests	2.51	0	0	473	Australasia	{"type":"MultiPoint","coordinates":[]}	0	0	0	0	0	0
000000000000000001b6	Tropical & Subtropical Moist Broadleaf Forests	1	AU01	146	New Caledonia rain forests	2.51	0	0	475	Australasia	{"type":"MultiPoint","coordinates":[]}	0	0	0	0	0	0
000000000000000001b7	Tropical & Subtropical Moist Broadleaf Forests	1	AU01	147	Norfolk Island subtropical forests	2.51	0	0	484	Australasia	{"type":"MultiPoint","coordinates":[]}	0	0	0	0	0	0
000000000000000001b8	Tropical & Subtropical Moist Broadleaf Forests	1	AU01	148	Northern New Guinea lowland rain and freshwater swamp forests	2.51	0	0	516	Australasia	{"type":"MultiPoint","coordinates":[]}	0	0	0	0	0	0
000000000000000001b9	Tropical & Subtropical Moist Broadleaf Forests	1	AU01	149	Northern New Guinea montane rain forests	2.51	0	0	517	Australasia	{"type":"MultiPoint","coordinates":[]}	0	0	0	0	0	0
000000000000000001ba	Tropical & Subtropical Moist Broadleaf Forests	1	AU01	150	Queensland tropical rain forests	2.51	0	0	587	Australasia	{"type":"MultiPoint","coordinates":[]}	0	0	0	0	0	0
000000000000000001bb	Tropical & Subtropical Moist Broadleaf Forests	1	AU01	151	Seram rain forests	2.51	0	0	621	Australasia	{"type":"MultiPoint","coordinates":[]}	0	0	0	0	0	0
000000000000000001bc	Tropical & Subtropical Moist Broadleaf Forests	1	AU01	152	Solomon Islands rain forests	2.51	0	0	641	Australasia	{"type":"MultiPoint","coordinates":[]}	0	0	0	0	0	0
000000000000000001bd	Tropical & Subtropical Moist Broadleaf Forests	1	AU01	153	Southeast Papuan rain forests	2.51	0	0	669	Australasia	{"type":"MultiPoint","coordinates":[]}	0	0	0	0	0	0
000000000000000001be	Tropical & Subtropical Moist Broadleaf Forests	1	AU01	154	Southern New Guinea freshwater swamp forests	2.51	0	0	684	Australasia	{"type":"MultiPoint","coordinates":[]}	0	0	0	0	0	0
000000000000000001bf	Tropical & Subtropical Moist Broadleaf Forests	1	AU01	155	Southern New Guinea lowland rain forests	2.51	0	0	685	Australasia	{"type":"MultiPoint","coordinates":[]}	0	0	0	0	0	0
000000000000000001c0	Tropical & Subtropical Moist Broadleaf Forests	1	AU01	156	Sulawesi lowland rain forests	2.51	0	0	848	Australasia	{"type":"MultiPoint","coordinates":[]}	0	0	0	0	0	0
000000000000000001c1	Tropical & Subtropical Moist Broadleaf Forests	1	AU01	157	Sulawesi montane rain forests	2.51	0	0	706	Australasia	{"type":"MultiPoint","coordinates":[]}	0	0	0	0	0	0
000000000000000001c2	Tropical & Subtropical Moist Broadleaf Forests	1	AU01	158	Trobriand Islands rain forests	2.51	0	0	756	Australasia	{"type":"MultiPoint","coordinates":[]}	0	0	0	0	0	0
000000000000000001c3	Tropical & Subtropical Moist Broadleaf Forests	1	AU01	159	Vanuatu rain forests	2.51	0	0	769	Australasia	{"type":"MultiPoint","coordinates":[]}	0	0	0	0	0	0
000000000000000001c4	Tropical & Subtropical Moist Broadleaf Forests	1	AU01	160	Vogelkop montane rain forests	2.51	0	0	776	Australasia	{"type":"MultiPoint","coordinates":[]}	0	0	0	0	0	0
000000000000000001c5	Tropical & Subtropical Moist Broadleaf Forests	1	AU01	161	Vogelkop-Aru lowland rain forests	2.51	0	0	775	Australasia	{"type":"MultiPoint","coordinates":[]}	0	0	0	0	0	0
000000000000000001c6	Tropical & Subtropical Moist Broadleaf Forests	1	AU01	162	Yapen rain forests	2.51	0	0	806	Australasia	{"type":"MultiPoint","coordinates":[]}	0	0	0	0	0	0
000000000000000001fe	Tropical & Subtropical Moist Broadleaf Forests	1	IN01	238	Lower Gangetic Plains moist deciduous forests	2.51	0	2.51	394	Indomalayan	{"type":"MultiPoint","coordinates":[]}	0	0	0	0	0	0
201	Tropical & Subtropical Moist Broadleaf Forests	1	IN01	225	Chao Phraya lowland moist deciduous forests	2.51	0	2.51	158	Indomalayan	{"type":"MultiPoint","coordinates":[]}	0	0	0	0	0	0
202	Tropical & Subtropical Moist Broadleaf Forests	1	IN01	235	Irrawaddy moist deciduous forests	2.51	0	2.51	343	Indomalayan	{"type":"MultiPoint","coordinates":[]}	0	0	0	0	0	0
204	Tropical & Subtropical Moist Broadleaf Forests	1	IN01	257	Northern Khorat Plateau moist deciduous forests	2.51	0	2.51	514	Indomalayan	{"type":"MultiPoint","coordinates":[]}	0	0	0	0	0	0
205	Tropical & Subtropical Moist Broadleaf Forests	1	IN01	258	Northern Thailand-Laos moist deciduous forests	2.51	0	2.51	521	Indomalayan	{"type":"MultiPoint","coordinates":[]}	0	0	0	0	0	0
206	Tropical & Subtropical Moist Broadleaf Forests	1	IN01	261	Orissa semi-evergreen forests	2.51	0	2.51	545	Indomalayan	{"type":"MultiPoint","coordinates":[]}	0	0	0	0	0	0
208	Tropical & Subtropical Moist Broadleaf Forests	1	IN01	218	Andaman Islands rain forests	2.51	0	2.51	27	Indomalayan	{"type":"MultiPoint","coordinates":[]}	0	0	0	0	0	0
209	Tropical & Subtropical Moist Broadleaf Forests	1	IN01	219	Borneo lowland rain forests	2.51	0	2.51	78	Indomalayan	{"type":"MultiPoint","coordinates":[]}	0	0	0	0	0	0
0000000000000000020a	Tropical & Subtropical Moist Broadleaf Forests	1	IN01	220	Borneo montane rain forests	2.51	0	2.51	79	Indomalayan	{"type":"MultiPoint","coordinates":[]}	0	0	0	0	0	0
0000000000000000020b	Tropical & Subtropical Moist Broadleaf Forests	1	IN01	221	Borneo peat swamp forests	2.51	0	2.51	80	Indomalayan	{"type":"MultiPoint","coordinates":[]}	0	0	0	0	0	0
0000000000000000020d	Tropical & Subtropical Moist Broadleaf Forests	1	IN01	223	Cardamom Mountains rain forests	2.51	0	2.51	103	Indomalayan	{"type":"MultiPoint","coordinates":[]}	0	0	0	0	0	0
0000000000000000020e	Tropical & Subtropical Moist Broadleaf Forests	1	IN01	224	Chao Phraya freshwater swamp forests	2.51	0	2.51	157	Indomalayan	{"type":"MultiPoint","coordinates":[]}	0	0	0	0	0	0
0000000000000000020f	Tropical & Subtropical Moist Broadleaf Forests	1	IN01	226	Chin Hills-Arakan Yoma montane forests	2.51	0	2.51	167	Indomalayan	{"type":"MultiPoint","coordinates":[]}	0	0	0	0	0	0
210	Tropical & Subtropical Moist Broadleaf Forests	1	IN01	227	Christmas and Cocos Islands tropical forests	2.51	0	2.51	170	Indomalayan	{"type":"MultiPoint","coordinates":[]}	0	0	0	0	0	0
211	Tropical & Subtropical Moist Broadleaf Forests	1	IN01	228	East Deccan moist deciduous forests	2.51	0	2.51	236	Indomalayan	{"type":"MultiPoint","coordinates":[]}	0	0	0	0	0	0
212	Tropical & Subtropical Moist Broadleaf Forests	1	IN01	229	Eastern Java-Bali montane rain forests	2.51	0	2.51	240	Indomalayan	{"type":"MultiPoint","coordinates":[]}	0	0	0	0	0	0
213	Tropical & Subtropical Moist Broadleaf Forests	1	IN01	230	Eastern Java-Bali rain forests	2.51	0	2.51	241	Indomalayan	{"type":"MultiPoint","coordinates":[]}	0	0	0	0	0	0
214	Tropical & Subtropical Moist Broadleaf Forests	1	IN01	231	Greater Negros-Panay rain forests	2.51	0	2.51	287	Indomalayan	{"type":"MultiPoint","coordinates":[]}	0	0	0	0	0	0
215	Tropical & Subtropical Moist Broadleaf Forests	1	IN01	232	Hainan Island monsoon rain forests	2.51	0	2.51	302	Indomalayan	{"type":"MultiPoint","coordinates":[]}	0	0	0	0	0	0
217	Tropical & Subtropical Moist Broadleaf Forests	1	IN01	234	Irrawaddy freshwater swamp forests	2.51	0	2.51	342	Indomalayan	{"type":"MultiPoint","coordinates":[]}	0	0	0	0	0	0
218	Tropical & Subtropical Moist Broadleaf Forests	1	IN01	236	Jian Nan subtropical evergreen forests	2.51	0	2.51	354	Indomalayan	{"type":"MultiPoint","coordinates":[]}	0	0	0	0	0	0
0000000000000000021a	Tropical & Subtropical Moist Broadleaf Forests	1	IN01	239	Luang Prabang montane rain forests	2.51	0	2.51	395	Indomalayan	{"type":"MultiPoint","coordinates":[]}	0	0	0	0	0	0
0000000000000000021b	Tropical & Subtropical Moist Broadleaf Forests	1	IN01	240	Luzon montane rain forests	2.51	0	2.51	396	Indomalayan	{"type":"MultiPoint","coordinates":[]}	0	0	0	0	0	0
0000000000000000021c	Tropical & Subtropical Moist Broadleaf Forests	1	IN01	241	Luzon rain forests	2.51	0	2.51	397	Indomalayan	{"type":"MultiPoint","coordinates":[]}	0	0	0	0	0	0
0000000000000000021d	Tropical & Subtropical Moist Broadleaf Forests	1	IN01	242	Malabar Coast moist forests	2.51	0	2.51	413	Indomalayan	{"type":"MultiPoint","coordinates":[]}	0	0	0	0	0	0
0000000000000000021e	Tropical & Subtropical Moist Broadleaf Forests	1	IN01	243	Maldives-Lakshadweep-Chagos Archipelago tropical moist forests	2.51	0	2.51	414	Indomalayan	{"type":"MultiPoint","coordinates":[]}	0	0	0	0	0	0
0000000000000000021f	Tropical & Subtropical Moist Broadleaf Forests	1	IN01	244	Meghalaya subtropical forests	2.51	0	2.51	433	Indomalayan	{"type":"MultiPoint","coordinates":[]}	0	0	0	0	0	0
220	Tropical & Subtropical Moist Broadleaf Forests	1	IN01	245	Mentawai Islands rain forests	2.51	0	2.51	434	Indomalayan	{"type":"MultiPoint","coordinates":[]}	0	0	0	0	0	0
221	Tropical & Subtropical Moist Broadleaf Forests	1	IN01	246	Mindanao montane rain forests	2.51	0	2.51	443	Indomalayan	{"type":"MultiPoint","coordinates":[]}	0	0	0	0	0	0
222	Tropical & Subtropical Moist Broadleaf Forests	1	IN01	247	Mindanao-Eastern Visayas rain forests	2.51	0	2.51	442	Indomalayan	{"type":"MultiPoint","coordinates":[]}	0	0	0	0	0	0
223	Tropical & Subtropical Moist Broadleaf Forests	1	IN01	248	Mindoro rain forests	2.51	0	2.51	444	Indomalayan	{"type":"MultiPoint","coordinates":[]}	0	0	0	0	0	0
225	Tropical & Subtropical Moist Broadleaf Forests	1	IN01	250	Myanmar coastal rain forests	2.51	0	2.51	459	Indomalayan	{"type":"MultiPoint","coordinates":[]}	0	0	0	0	0	0
226	Tropical & Subtropical Moist Broadleaf Forests	1	IN01	251	Nansei Islands subtropical evergreen forests	2.51	0	2.51	464	Indomalayan	{"type":"MultiPoint","coordinates":[]}	0	0	0	0	0	0
227	Tropical & Subtropical Moist Broadleaf Forests	1	IN01	252	Nicobar Islands rain forests	2.51	0	2.51	478	Indomalayan	{"type":"MultiPoint","coordinates":[]}	0	0	0	0	0	0
229	Tropical & Subtropical Moist Broadleaf Forests	1	IN01	255	Northern Annamites rain forests	2.51	0	2.51	508	Indomalayan	{"type":"MultiPoint","coordinates":[]}	0	0	0	0	0	0
0000000000000000022c	Tropical & Subtropical Moist Broadleaf Forests	1	IN01	260	Northern Vietnam lowland rain forests	2.51	0	2.51	524	Indomalayan	{"type":"MultiPoint","coordinates":[]}	0	0	0	0	0	0
0000000000000000022d	Tropical & Subtropical Moist Broadleaf Forests	1	IN01	262	Palawan rain forests	2.51	0	2.51	550	Indomalayan	{"type":"MultiPoint","coordinates":[]}	0	0	0	0	0	0
0000000000000000022f	Tropical & Subtropical Moist Broadleaf Forests	1	IN01	264	Peninsular Malaysian peat swamp forests	2.51	0	2.51	564	Indomalayan	{"type":"MultiPoint","coordinates":[]}	0	0	0	0	0	0
231	Tropical & Subtropical Moist Broadleaf Forests	1	IN01	266	Red River freshwater swamp forests	2.51	0	2.51	591	Indomalayan	{"type":"MultiPoint","coordinates":[]}	0	0	0	0	0	0
232	Tropical & Subtropical Moist Broadleaf Forests	1	IN01	267	South China Sea Islands	2.51	0	2.51	650	Indomalayan	{"type":"MultiPoint","coordinates":[]}	0	0	0	0	0	0
233	Tropical & Subtropical Moist Broadleaf Forests	1	IN01	268	South China-Vietnam subtropical evergreen forests	2.51	0	2.51	649	Indomalayan	{"type":"MultiPoint","coordinates":[]}	0	0	0	0	0	0
234	Tropical & Subtropical Moist Broadleaf Forests	1	IN01	269	South Taiwan monsoon rain forests	2.51	0	2.51	658	Indomalayan	{"type":"MultiPoint","coordinates":[]}	0	0	0	0	0	0
236	Tropical & Subtropical Moist Broadleaf Forests	1	IN01	272	Southern Annamites montane rain forests	2.51	0	2.51	675	Indomalayan	{"type":"MultiPoint","coordinates":[]}	0	0	0	0	0	0
237	Tropical & Subtropical Moist Broadleaf Forests	1	IN01	273	Southwest Borneo freshwater swamp forests	2.51	0	2.51	695	Indomalayan	{"type":"MultiPoint","coordinates":[]}	0	0	0	0	0	0
238	Tropical & Subtropical Moist Broadleaf Forests	1	IN01	274	Sri Lanka lowland rain forests	2.51	0	2.51	698	Indomalayan	{"type":"MultiPoint","coordinates":[]}	0	0	0	0	0	0
239	Tropical & Subtropical Moist Broadleaf Forests	1	IN01	275	Sri Lanka montane rain forests	2.51	0	2.51	699	Indomalayan	{"type":"MultiPoint","coordinates":[]}	0	0	0	0	0	0
0000000000000000023a	Tropical & Subtropical Moist Broadleaf Forests	1	IN01	276	Sulu Archipelago rain forests	2.51	0	2.51	707	Indomalayan	{"type":"MultiPoint","coordinates":[]}	0	0	0	0	0	0
0000000000000000023b	Tropical & Subtropical Moist Broadleaf Forests	1	IN01	277	Sumatran freshwater swamp forests	2.51	0	2.51	708	Indomalayan	{"type":"MultiPoint","coordinates":[]}	0	0	0	0	0	0
0000000000000000023f	Tropical & Subtropical Moist Broadleaf Forests	1	IN01	281	Sundaland heath forests	2.51	0	2.51	715	Indomalayan	{"type":"MultiPoint","coordinates":[]}	0	0	0	0	0	0
240	Tropical & Subtropical Moist Broadleaf Forests	1	IN01	282	Sundarbans freshwater swamp forests	2.51	0	2.51	716	Indomalayan	{"type":"MultiPoint","coordinates":[]}	0	0	0	0	0	0
241	Tropical & Subtropical Moist Broadleaf Forests	1	IN01	283	Taiwan subtropical evergreen forests	2.51	0	2.51	722	Indomalayan	{"type":"MultiPoint","coordinates":[]}	0	0	0	0	0	0
242	Tropical & Subtropical Moist Broadleaf Forests	1	IN01	285	Tonle Sap freshwater swamp forests	2.51	0	2.51	747	Indomalayan	{"type":"MultiPoint","coordinates":[]}	0	0	0	0	0	0
243	Tropical & Subtropical Moist Broadleaf Forests	1	IN01	286	Tonle Sap-Mekong peat swamp forests	2.51	0	2.51	746	Indomalayan	{"type":"MultiPoint","coordinates":[]}	0	0	0	0	0	0
244	Tropical & Subtropical Moist Broadleaf Forests	1	IN01	288	Western Java montane rain forests	2.51	0	2.51	793	Indomalayan	{"type":"MultiPoint","coordinates":[]}	0	0	0	0	0	0
245	Tropical & Subtropical Moist Broadleaf Forests	1	IN01	289	Western Java rain forests	2.51	0	2.51	794	Indomalayan	{"type":"MultiPoint","coordinates":[]}	0	0	0	0	0	0
000000000000000002dc	Tropical & Subtropical Moist Broadleaf Forests	1	NO01	439	Alto Paranï¿½ Atlantic forests	2.51	0	0	22	Neotropic	{"type":"MultiPoint","coordinates":[]}	0	0	0	0	0	0
000000000000000002dd	Tropical & Subtropical Moist Broadleaf Forests	1	NO01	440	Araucaria moist forests	2.51	0	0	39	Neotropic	{"type":"MultiPoint","coordinates":[]}	0	0	0	0	0	0
000000000000000002de	Tropical & Subtropical Moist Broadleaf Forests	1	NO01	441	Atlantic Coast restingas	2.51	0	0	48	Neotropic	{"type":"MultiPoint","coordinates":[]}	0	0	0	0	0	0
000000000000000002df	Tropical & Subtropical Moist Broadleaf Forests	1	NO01	442	Bahia coastal forests	2.51	0	0	58	Neotropic	{"type":"MultiPoint","coordinates":[]}	0	0	0	0	0	0
2	Tropical & Subtropical Moist Broadleaf Forests	1	NO01	443	Bahia interior forests	2.51	0	0	59	Neotropic	{"type":"MultiPoint","coordinates":[]}	0	0	0	0	0	0
20	Tropical & Subtropical Moist Broadleaf Forests	1	NO01	444	Bolivian Yungas	2.51	0	0	77	Neotropic	{"type":"MultiPoint","coordinates":[]}	0	0	0	0	0	0
200	Tropical & Subtropical Moist Broadleaf Forests	1	NO01	445	Caatinga Enclaves moist forests	2.51	0	0	87	Neotropic	{"type":"MultiPoint","coordinates":[]}	0	0	0	0	0	0
2000	Tropical & Subtropical Moist Broadleaf Forests	1	NO01	446	Caqueta moist forests	2.51	0	0	102	Neotropic	{"type":"MultiPoint","coordinates":[]}	0	0	0	0	0	0
20000	Tropical & Subtropical Moist Broadleaf Forests	1	NO01	447	Catatumbo moist forests	2.51	0	0	111	Neotropic	{"type":"MultiPoint","coordinates":[]}	0	0	0	0	0	0
200000	Tropical & Subtropical Moist Broadleaf Forests	1	NO01	448	Cauca Valley montane forests	2.51	0	0	113	Neotropic	{"type":"MultiPoint","coordinates":[]}	0	0	0	0	0	0
2000000	Tropical & Subtropical Moist Broadleaf Forests	1	NO01	449	Cayos Miskitos-San Andrï¿½s and Providencia moist forests	2.51	0	0	115	Neotropic	{"type":"MultiPoint","coordinates":[]}	0	0	0	0	0	0
20000000	Tropical & Subtropical Moist Broadleaf Forests	1	NO01	450	Central American Atlantic moist forests	2.51	0	0	119	Neotropic	{"type":"MultiPoint","coordinates":[]}	0	0	0	0	0	0
200000000	Tropical & Subtropical Moist Broadleaf Forests	1	NO01	451	Central American montane forests	2.51	0	0	121	Neotropic	{"type":"MultiPoint","coordinates":[]}	0	0	0	0	0	0
2000000000	Tropical & Subtropical Moist Broadleaf Forests	1	NO01	452	Chiapas montane forests	2.51	0	0	163	Neotropic	{"type":"MultiPoint","coordinates":[]}	0	0	0	0	0	0
000000000000000002ea	Tropical & Subtropical Moist Broadleaf Forests	1	NO01	453	Chimalapas montane forests	2.51	0	0	166	Neotropic	{"type":"MultiPoint","coordinates":[]}	0	0	0	0	0	0
000000000000000002eb	Tropical & Subtropical Moist Broadleaf Forests	1	NO01	454	Chocï¿½-Dariï¿½n moist forests	2.51	0	0	169	Neotropic	{"type":"MultiPoint","coordinates":[]}	0	0	0	0	0	0
000000000000000002ec	Tropical & Subtropical Moist Broadleaf Forests	1	NO01	455	Cocos Island moist forests	2.51	0	0	173	Neotropic	{"type":"MultiPoint","coordinates":[]}	0	0	0	0	0	0
000000000000000002ed	Tropical & Subtropical Moist Broadleaf Forests	1	NO01	456	Cordillera La Costa montane forests	2.51	0	0	183	Neotropic	{"type":"MultiPoint","coordinates":[]}	0	0	0	0	0	0
000000000000000002ee	Tropical & Subtropical Moist Broadleaf Forests	1	NO01	457	Cordillera Oriental montane forests	2.51	0	0	184	Neotropic	{"type":"MultiPoint","coordinates":[]}	0	0	0	0	0	0
000000000000000002ef	Tropical & Subtropical Moist Broadleaf Forests	1	NO01	458	Costa Rican seasonal moist forests	2.51	0	0	186	Neotropic	{"type":"MultiPoint","coordinates":[]}	0	0	0	0	0	0
000000000000000002f0	Tropical & Subtropical Moist Broadleaf Forests	1	NO01	459	Cuban moist forests	2.51	0	0	194	Neotropic	{"type":"MultiPoint","coordinates":[]}	0	0	0	0	0	0
000000000000000002f1	Tropical & Subtropical Moist Broadleaf Forests	1	NO01	460	Eastern Cordillera Real montane forests	2.51	0	0	231	Neotropic	{"type":"MultiPoint","coordinates":[]}	0	0	0	0	0	0
000000000000000002f2	Tropical & Subtropical Moist Broadleaf Forests	1	NO01	461	Eastern Panamanian montane forests	2.51	0	0	244	Neotropic	{"type":"MultiPoint","coordinates":[]}	0	0	0	0	0	0
000000000000000002f3	Tropical & Subtropical Moist Broadleaf Forests	1	NO01	462	Fernando de Noronha-Atol das Rocas moist forests	2.51	0	0	266	Neotropic	{"type":"MultiPoint","coordinates":[]}	0	0	0	0	0	0
000000000000000002f4	Tropical & Subtropical Moist Broadleaf Forests	1	NO01	463	Guianan freshwater swamp forests	2.51	0	0	290	Neotropic	{"type":"MultiPoint","coordinates":[]}	0	0	0	0	0	0
000000000000000002f5	Tropical & Subtropical Moist Broadleaf Forests	1	NO01	464	Guianan Highlands moist forests	2.51	0	0	291	Neotropic	{"type":"MultiPoint","coordinates":[]}	0	0	0	0	0	0
000000000000000002f6	Tropical & Subtropical Moist Broadleaf Forests	1	NO01	465	Guianan lowland moist forests	2.51	0	0	292	Neotropic	{"type":"MultiPoint","coordinates":[]}	0	0	0	0	0	0
000000000000000002f7	Tropical & Subtropical Moist Broadleaf Forests	1	NO01	466	Guianan piedmont moist forests	2.51	0	0	293	Neotropic	{"type":"MultiPoint","coordinates":[]}	0	0	0	0	0	0
000000000000000002f8	Tropical & Subtropical Moist Broadleaf Forests	1	NO01	467	Gurupa vï¿½rzea	2.51	0	0	301	Neotropic	{"type":"MultiPoint","coordinates":[]}	0	0	0	0	0	0
000000000000000002f9	Tropical & Subtropical Moist Broadleaf Forests	1	NO01	468	Hispaniolan moist forests	2.51	0	0	318	Neotropic	{"type":"MultiPoint","coordinates":[]}	0	0	0	0	0	0
000000000000000002fa	Tropical & Subtropical Moist Broadleaf Forests	1	NO01	469	Iquitos vï¿½rzea	2.51	0	0	340	Neotropic	{"type":"MultiPoint","coordinates":[]}	0	0	0	0	0	0
000000000000000002fb	Tropical & Subtropical Moist Broadleaf Forests	1	NO01	470	Isthmian-Atlantic moist forests	2.51	0	0	345	Neotropic	{"type":"MultiPoint","coordinates":[]}	0	0	0	0	0	0
000000000000000002fc	Tropical & Subtropical Moist Broadleaf Forests	1	NO01	471	Isthmian-Pacific moist forests	2.51	0	0	346	Neotropic	{"type":"MultiPoint","coordinates":[]}	0	0	0	0	0	0
000000000000000002fd	Tropical & Subtropical Moist Broadleaf Forests	1	NO01	472	Jamaican moist forests	2.51	0	0	351	Neotropic	{"type":"MultiPoint","coordinates":[]}	0	0	0	0	0	0
000000000000000002fe	Tropical & Subtropical Moist Broadleaf Forests	1	NO01	473	Japurï¿½-Solimï¿½es-Negro moist forests	2.51	0	0	352	Neotropic	{"type":"MultiPoint","coordinates":[]}	0	0	0	0	0	0
000000000000000002ff	Tropical & Subtropical Moist Broadleaf Forests	1	NO01	474	Juruï¿½-Purus moist forests	2.51	0	0	358	Neotropic	{"type":"MultiPoint","coordinates":[]}	0	0	0	0	0	0
300	Tropical & Subtropical Moist Broadleaf Forests	1	NO01	475	Leeward Islands moist forests	2.51	0	0	387	Neotropic	{"type":"MultiPoint","coordinates":[]}	0	0	0	0	0	0
301	Tropical & Subtropical Moist Broadleaf Forests	1	NO01	476	Madeira-Tapajï¿½s moist forests	2.51	0	0	406	Neotropic	{"type":"MultiPoint","coordinates":[]}	0	0	0	0	0	0
302	Tropical & Subtropical Moist Broadleaf Forests	1	NO01	477	Magdalena Valley montane forests	2.51	0	0	410	Neotropic	{"type":"MultiPoint","coordinates":[]}	0	0	0	0	0	0
303	Tropical & Subtropical Moist Broadleaf Forests	1	NO01	478	Magdalena-Urabï¿½ moist forests	2.51	0	0	408	Neotropic	{"type":"MultiPoint","coordinates":[]}	0	0	0	0	0	0
304	Tropical & Subtropical Moist Broadleaf Forests	1	NO01	480	Marajï¿½ vï¿½rzea	2.51	0	0	420	Neotropic	{"type":"MultiPoint","coordinates":[]}	0	0	0	0	0	0
305	Tropical & Subtropical Moist Broadleaf Forests	1	NO01	479	Maraï¿½ï¿½n dry forests	2.51	0	0	422	Neotropic	{"type":"MultiPoint","coordinates":[]}	0	0	0	0	0	0
306	Tropical & Subtropical Moist Broadleaf Forests	1	NO01	481	Mato Grosso tropical dry forests	2.51	0	0	427	Neotropic	{"type":"MultiPoint","coordinates":[]}	0	0	0	0	0	0
307	Tropical & Subtropical Moist Broadleaf Forests	1	NO01	482	Monte Alegre vï¿½rzea	2.51	0	0	452	Neotropic	{"type":"MultiPoint","coordinates":[]}	0	0	0	0	0	0
308	Tropical & Subtropical Moist Broadleaf Forests	1	NO01	483	Napo moist forests	2.51	0	0	465	Neotropic	{"type":"MultiPoint","coordinates":[]}	0	0	0	0	0	0
309	Tropical & Subtropical Moist Broadleaf Forests	1	NO01	484	Negro-Branco moist forests	2.51	0	0	469	Neotropic	{"type":"MultiPoint","coordinates":[]}	0	0	0	0	0	0
0000000000000000030a	Tropical & Subtropical Moist Broadleaf Forests	1	NO01	485	Northeast Brazil restingas	2.51	0	0	500	Neotropic	{"type":"MultiPoint","coordinates":[]}	0	0	0	0	0	0
0000000000000000030b	Tropical & Subtropical Moist Broadleaf Forests	1	NO01	486	Northwest Andean montane forests	2.51	0	0	528	Neotropic	{"type":"MultiPoint","coordinates":[]}	0	0	0	0	0	0
0000000000000000030c	Tropical & Subtropical Moist Broadleaf Forests	1	NO01	487	Oaxacan montane forests	2.51	0	0	537	Neotropic	{"type":"MultiPoint","coordinates":[]}	0	0	0	0	0	0
0000000000000000030d	Tropical & Subtropical Moist Broadleaf Forests	1	NO01	488	Orinoco Delta swamp forests	2.51	0	0	543	Neotropic	{"type":"MultiPoint","coordinates":[]}	0	0	0	0	0	0
0000000000000000030e	Tropical & Subtropical Moist Broadleaf Forests	1	NO01	489	Pantanos de Centla	2.51	0	0	556	Neotropic	{"type":"MultiPoint","coordinates":[]}	0	0	0	0	0	0
0000000000000000030f	Tropical & Subtropical Moist Broadleaf Forests	1	NO01	490	Pantepui forests & shrublands	2.51	0	0	557	Neotropic	{"type":"MultiPoint","coordinates":[]}	0	0	0	0	0	0
310	Tropical & Subtropical Moist Broadleaf Forests	1	NO01	491	Pernambuco coastal forests	2.51	0	0	566	Neotropic	{"type":"MultiPoint","coordinates":[]}	0	0	0	0	0	0
311	Tropical & Subtropical Moist Broadleaf Forests	1	NO01	492	Pernambuco interior forests	2.51	0	0	567	Neotropic	{"type":"MultiPoint","coordinates":[]}	0	0	0	0	0	0
312	Tropical & Subtropical Moist Broadleaf Forests	1	NO01	493	Peruvian Yungas	2.51	0	0	568	Neotropic	{"type":"MultiPoint","coordinates":[]}	0	0	0	0	0	0
313	Tropical & Subtropical Moist Broadleaf Forests	1	NO01	494	Petï¿½n-Veracruz moist forests	2.51	0	0	569	Neotropic	{"type":"MultiPoint","coordinates":[]}	0	0	0	0	0	0
314	Tropical & Subtropical Moist Broadleaf Forests	1	NO01	495	Puerto Rican moist forests	2.51	0	0	577	Neotropic	{"type":"MultiPoint","coordinates":[]}	0	0	0	0	0	0
315	Tropical & Subtropical Moist Broadleaf Forests	1	NO01	496	Purus vï¿½rzea	2.51	0	0	580	Neotropic	{"type":"MultiPoint","coordinates":[]}	0	0	0	0	0	0
316	Tropical & Subtropical Moist Broadleaf Forests	1	NO01	497	Purus-Madeira moist forests	2.51	0	0	579	Neotropic	{"type":"MultiPoint","coordinates":[]}	0	0	0	0	0	0
317	Tropical & Subtropical Moist Broadleaf Forests	1	NO01	498	Rio Negro campinarana	2.51	0	0	598	Neotropic	{"type":"MultiPoint","coordinates":[]}	0	0	0	0	0	0
318	Tropical & Subtropical Moist Broadleaf Forests	1	NO01	499	Santa Marta montane forests	2.51	0	0	608	Neotropic	{"type":"MultiPoint","coordinates":[]}	0	0	0	0	0	0
319	Tropical & Subtropical Moist Broadleaf Forests	1	NO01	500	Serra do Mar coastal forests	2.51	0	0	623	Neotropic	{"type":"MultiPoint","coordinates":[]}	0	0	0	0	0	0
0000000000000000031a	Tropical & Subtropical Moist Broadleaf Forests	1	NO01	501	Sierra de los Tuxtlas	2.51	0	0	627	Neotropic	{"type":"MultiPoint","coordinates":[]}	0	0	0	0	0	0
0000000000000000031b	Tropical & Subtropical Moist Broadleaf Forests	1	NO01	502	Sierra Madre de Chiapas moist forests	2.51	0	0	628	Neotropic	{"type":"MultiPoint","coordinates":[]}	0	0	0	0	0	0
0000000000000000031c	Tropical & Subtropical Moist Broadleaf Forests	1	NO01	503	Solimï¿½es-Japurï¿½ moist forests	2.51	0	0	640	Neotropic	{"type":"MultiPoint","coordinates":[]}	0	0	0	0	0	0
0000000000000000031d	Tropical & Subtropical Moist Broadleaf Forests	1	NO01	504	Southern Andean Yungas	2.51	0	0	674	Neotropic	{"type":"MultiPoint","coordinates":[]}	0	0	0	0	0	0
0000000000000000031e	Tropical & Subtropical Moist Broadleaf Forests	1	NO01	505	Southwest Amazon moist forests	2.51	0	0	690	Neotropic	{"type":"MultiPoint","coordinates":[]}	0	0	0	0	0	0
0000000000000000031f	Tropical & Subtropical Moist Broadleaf Forests	1	NO01	506	Talamancan montane forests	2.51	0	0	724	Neotropic	{"type":"MultiPoint","coordinates":[]}	0	0	0	0	0	0
320	Tropical & Subtropical Moist Broadleaf Forests	1	NO01	507	Tapajï¿½s-Xingu moist forests	2.51	0	0	727	Neotropic	{"type":"MultiPoint","coordinates":[]}	0	0	0	0	0	0
321	Tropical & Subtropical Moist Broadleaf Forests	1	NO01	508	Tocantins/Pindare moist forests	2.51	0	0	836	Neotropic	{"type":"MultiPoint","coordinates":[]}	0	0	0	0	0	0
322	Tropical & Subtropical Moist Broadleaf Forests	1	NO01	509	Trindade-Martin Vaz Islands tropical forests	2.51	0	0	840	Neotropic	{"type":"MultiPoint","coordinates":[]}	0	0	0	0	0	0
323	Tropical & Subtropical Moist Broadleaf Forests	1	NO01	510	Trinidad and Tobago moist forest	2.51	0	0	754	Neotropic	{"type":"MultiPoint","coordinates":[]}	0	0	0	0	0	0
324	Tropical & Subtropical Moist Broadleaf Forests	1	NO01	511	Uatumï¿½-Trombetas moist forests	2.51	0	0	761	Neotropic	{"type":"MultiPoint","coordinates":[]}	0	0	0	0	0	0
325	Tropical & Subtropical Moist Broadleaf Forests	1	NO01	512	Ucayali moist forests	2.51	0	0	762	Neotropic	{"type":"MultiPoint","coordinates":[]}	0	0	0	0	0	0
326	Tropical & Subtropical Moist Broadleaf Forests	1	NO01	513	Venezuelan Andes montane forests	2.51	0	0	770	Neotropic	{"type":"MultiPoint","coordinates":[]}	0	0	0	0	0	0
327	Tropical & Subtropical Moist Broadleaf Forests	1	NO01	514	Veracruz moist forests	2.51	0	0	772	Neotropic	{"type":"MultiPoint","coordinates":[]}	0	0	0	0	0	0
328	Tropical & Subtropical Moist Broadleaf Forests	1	NO01	515	Veracruz montane forests	2.51	0	0	773	Neotropic	{"type":"MultiPoint","coordinates":[]}	0	0	0	0	0	0
329	Tropical & Subtropical Moist Broadleaf Forests	1	NO01	516	Western Ecuador moist forests	2.51	0	0	785	Neotropic	{"type":"MultiPoint","coordinates":[]}	0	0	0	0	0	0
0000000000000000032a	Tropical & Subtropical Moist Broadleaf Forests	1	NO01	517	Windward Islands moist forests	2.51	0	0	800	Neotropic	{"type":"MultiPoint","coordinates":[]}	0	0	0	0	0	0
0000000000000000032b	Tropical & Subtropical Moist Broadleaf Forests	1	NO01	518	Xingu-Tocantins-Araguaia moist forests	2.51	0	0	803	Neotropic	{"type":"MultiPoint","coordinates":[]}	0	0	0	0	0	0
0000000000000000032c	Tropical & Subtropical Moist Broadleaf Forests	1	NO01	519	Yucatï¿½n moist forests	2.51	0	0	810	Neotropic	{"type":"MultiPoint","coordinates":[]}	0	0	0	0	0	0
0000000000000000000e	Tropical & Subtropical Grasslands, Savannas & Shrublands	7	NO07	564	Belizian pine savannas	2.13	0	0	67	Neotropic	{"type":"MultiPoint","coordinates":[]}	0	0	0	0	0	0
0000000000000000000f	Tropical & Subtropical Grasslands, Savannas & Shrublands	7	NO07	565	Beni savanna	2.13	0	0	68	Neotropic	{"type":"MultiPoint","coordinates":[]}	0	0	0	0	0	0
10	Tropical & Subtropical Grasslands, Savannas & Shrublands	7	NO07	566	Campos Rupestres montane savanna	2.13	0	0	94	Neotropic	{"type":"MultiPoint","coordinates":[]}	0	0	0	0	0	0
11	Tropical & Subtropical Grasslands, Savannas & Shrublands	7	NO07	567	Cerrado	2.13	0	0	154	Neotropic	{"type":"MultiPoint","coordinates":[]}	0	0	0	0	0	0
12	Tropical & Subtropical Grasslands, Savannas & Shrublands	7	NO07	568	Clipperton Island shrub and grasslands	2.13	0	0	172	Neotropic	{"type":"MultiPoint","coordinates":[]}	0	0	0	0	0	0
13	Tropical & Subtropical Grasslands, Savannas & Shrublands	7	NO07	569	Dry Chaco	2.13	0	0	208	Neotropic	{"type":"MultiPoint","coordinates":[]}	0	0	0	0	0	0
14	Tropical & Subtropical Grasslands, Savannas & Shrublands	7	NO07	570	Guianan savanna	2.13	0	0	294	Neotropic	{"type":"MultiPoint","coordinates":[]}	0	0	0	0	0	0
15	Tropical & Subtropical Grasslands, Savannas & Shrublands	7	NO07	571	Humid Chaco	2.13	0	0	326	Neotropic	{"type":"MultiPoint","coordinates":[]}	0	0	0	0	0	0
16	Tropical & Subtropical Grasslands, Savannas & Shrublands	7	NO07	572	Llanos	2.13	0	0	390	Neotropic	{"type":"MultiPoint","coordinates":[]}	0	0	0	0	0	0
17	Tropical & Subtropical Grasslands, Savannas & Shrublands	7	NO07	573	Miskito pine forests	2.13	0	0	445	Neotropic	{"type":"MultiPoint","coordinates":[]}	0	0	0	0	0	0
18	Tropical & Subtropical Grasslands, Savannas & Shrublands	7	NO07	574	Uruguayan savanna	2.13	0	0	766	Neotropic	{"type":"MultiPoint","coordinates":[]}	0	0	0	0	0	0
19	Tropical & Subtropical Grasslands, Savannas & Shrublands	7	NO07	639	Hawai'i tropical high shrublands	2.13	0	0	306	Oceania	{"type":"MultiPoint","coordinates":[]}	0	0	0	0	0	0
0000000000000000001a	Tropical & Subtropical Grasslands, Savannas & Shrublands	7	NO07	640	Hawai'i tropical low shrublands	2.13	0	0	307	Oceania	{"type":"MultiPoint","coordinates":[]}	0	0	0	0	0	0
0000000000000000001b	Tropical & Subtropical Grasslands, Savannas & Shrublands	7	NO07	641	Northwest Hawai'i scrub	2.13	0	0	530	Oceania	{"type":"MultiPoint","coordinates":[]}	0	0	0	0	0	0
147	Tropical & Subtropical Grasslands, Savannas & Shrublands	7	AF07	34	Angolan mopane woodlands	2.13	0	0	29	Afrotropic	{"type":"MultiPoint","coordinates":[]}	0	0	0	0	0	0
148	Tropical & Subtropical Grasslands, Savannas & Shrublands	7	AF07	35	Angolan scarp savanna and woodlands	2.13	0	0	30	Afrotropic	{"type":"MultiPoint","coordinates":[]}	0	0	0	0	0	0
149	Tropical & Subtropical Grasslands, Savannas & Shrublands	7	AF07	36	Angolan wet miombo woodlands	2.13	0	0	31	Afrotropic	{"type":"MultiPoint","coordinates":[]}	0	0	0	0	0	0
0000000000000000014a	Tropical & Subtropical Grasslands, Savannas & Shrublands	7	AF07	37	Ascension scrub and grasslands	2.13	0	0	46	Afrotropic	{"type":"MultiPoint","coordinates":[]}	0	0	0	0	0	0
0000000000000000014b	Tropical & Subtropical Grasslands, Savannas & Shrublands	7	AF07	38	Central bushveld	2.13	0	0	134	Afrotropic	{"type":"MultiPoint","coordinates":[]}	0	0	0	0	0	0
0000000000000000014c	Tropical & Subtropical Grasslands, Savannas & Shrublands	7	AF07	39	Central Zambezian wet miombo woodlands	2.13	0	0	153	Afrotropic	{"type":"MultiPoint","coordinates":[]}	0	0	0	0	0	0
0000000000000000014d	Tropical & Subtropical Grasslands, Savannas & Shrublands	7	AF07	40	Drakensberg Escarpment savanna and thicket	2.13	0	0	205	Afrotropic	{"type":"MultiPoint","coordinates":[]}	0	0	0	0	0	0
0000000000000000014e	Tropical & Subtropical Grasslands, Savannas & Shrublands	7	AF07	41	Drakensberg grasslands	2.13	0	0	206	Afrotropic	{"type":"MultiPoint","coordinates":[]}	0	0	0	0	0	0
0000000000000000014f	Tropical & Subtropical Grasslands, Savannas & Shrublands	7	AF07	42	Dry miombo woodlands	2.13	0	0	816	Afrotropic	{"type":"MultiPoint","coordinates":[]}	0	0	0	0	0	0
150	Tropical & Subtropical Grasslands, Savannas & Shrublands	7	AF07	43	East Sudanian savanna	2.13	0	0	221	Afrotropic	{"type":"MultiPoint","coordinates":[]}	0	0	0	0	0	0
151	Tropical & Subtropical Grasslands, Savannas & Shrublands	7	AF07	44	Guinean forest-savanna	2.13	0	0	295	Afrotropic	{"type":"MultiPoint","coordinates":[]}	0	0	0	0	0	0
152	Tropical & Subtropical Grasslands, Savannas & Shrublands	7	AF07	45	Horn of Africa xeric bushlands	2.13	0	0	324	Afrotropic	{"type":"MultiPoint","coordinates":[]}	0	0	0	0	0	0
153	Tropical & Subtropical Grasslands, Savannas & Shrublands	7	AF07	46	Itigi-Sumbu thicket	2.13	0	0	348	Afrotropic	{"type":"MultiPoint","coordinates":[]}	0	0	0	0	0	0
154	Tropical & Subtropical Grasslands, Savannas & Shrublands	7	AF07	47	Kalahari Acacia woodlands	2.13	0	0	360	Afrotropic	{"type":"MultiPoint","coordinates":[]}	0	0	0	0	0	0
155	Tropical & Subtropical Grasslands, Savannas & Shrublands	7	AF07	48	Limpopo lowveld	2.13	0	0	389	Afrotropic	{"type":"MultiPoint","coordinates":[]}	0	0	0	0	0	0
156	Tropical & Subtropical Grasslands, Savannas & Shrublands	7	AF07	49	Mandara Plateau woodlands	2.13	0	0	417	Afrotropic	{"type":"MultiPoint","coordinates":[]}	0	0	0	0	0	0
157	Tropical & Subtropical Grasslands, Savannas & Shrublands	7	AF07	50	Masai xeric grasslands and shrublands	2.13	0	0	425	Afrotropic	{"type":"MultiPoint","coordinates":[]}	0	0	0	0	0	0
158	Tropical & Subtropical Grasslands, Savannas & Shrublands	7	AF07	51	Northern Acacia-Commiphora bushlands and thickets	2.13	0	0	505	Afrotropic	{"type":"MultiPoint","coordinates":[]}	0	0	0	0	0	0
159	Tropical & Subtropical Grasslands, Savannas & Shrublands	7	AF07	52	Northern Congolian Forest-Savanna	2.13	0	0	511	Afrotropic	{"type":"MultiPoint","coordinates":[]}	0	0	0	0	0	0
0000000000000000015a	Tropical & Subtropical Grasslands, Savannas & Shrublands	7	AF07	53	Sahelian Acacia savanna	2.13	0	0	602	Afrotropic	{"type":"MultiPoint","coordinates":[]}	0	0	0	0	0	0
0000000000000000015b	Tropical & Subtropical Grasslands, Savannas & Shrublands	7	AF07	54	Serengeti volcanic grasslands	2.13	0	0	622	Afrotropic	{"type":"MultiPoint","coordinates":[]}	0	0	0	0	0	0
0000000000000000015c	Tropical & Subtropical Grasslands, Savannas & Shrublands	7	AF07	55	Somali Acacia-Commiphora bushlands and thickets	2.13	0	0	642	Afrotropic	{"type":"MultiPoint","coordinates":[]}	0	0	0	0	0	0
0000000000000000015d	Tropical & Subtropical Grasslands, Savannas & Shrublands	7	AF07	56	South Arabian fog woodlands, shrublands, and dune	2.13	0	0	842	Afrotropic	{"type":"MultiPoint","coordinates":[]}	0	0	0	0	0	0
0000000000000000015e	Tropical & Subtropical Grasslands, Savannas & Shrublands	7	AF07	57	Southern Acacia-Commiphora bushlands and thickets	2.13	0	0	670	Afrotropic	{"type":"MultiPoint","coordinates":[]}	0	0	0	0	0	0
0000000000000000015f	Tropical & Subtropical Grasslands, Savannas & Shrublands	7	AF07	58	Southern Congolian forest-savanna	2.13	0	0	678	Afrotropic	{"type":"MultiPoint","coordinates":[]}	0	0	0	0	0	0
160	Tropical & Subtropical Grasslands, Savannas & Shrublands	7	AF07	59	Southwest Arabian montane woodlands and grasslands	2.13	0	0	841	Afrotropic	{"type":"MultiPoint","coordinates":[]}	0	0	0	0	0	0
161	Tropical & Subtropical Grasslands, Savannas & Shrublands	7	AF07	60	St. Helena scrub and woodlands	2.13	0	0	822	Afrotropic	{"type":"MultiPoint","coordinates":[]}	0	0	0	0	0	0
162	Tropical & Subtropical Grasslands, Savannas & Shrublands	7	AF07	61	Victoria Basin forest-savanna	2.13	0	0	823	Afrotropic	{"type":"MultiPoint","coordinates":[]}	0	0	0	0	0	0
163	Tropical & Subtropical Grasslands, Savannas & Shrublands	7	AF07	62	West Sudanian savanna	2.13	0	0	782	Afrotropic	{"type":"MultiPoint","coordinates":[]}	0	0	0	0	0	0
164	Tropical & Subtropical Grasslands, Savannas & Shrublands	7	AF07	63	Western Congolian forest-savanna	2.13	0	0	824	Afrotropic	{"type":"MultiPoint","coordinates":[]}	0	0	0	0	0	0
165	Tropical & Subtropical Grasslands, Savannas & Shrublands	7	AF07	64	Zambezian Baikiaea woodlands	2.13	0	0	814	Afrotropic	{"type":"MultiPoint","coordinates":[]}	0	0	0	0	0	0
166	Tropical & Subtropical Grasslands, Savannas & Shrublands	7	AF07	65	Zambezian mopane woodlands	2.13	0	0	819	Afrotropic	{"type":"MultiPoint","coordinates":[]}	0	0	0	0	0	0
167	Tropical & Subtropical Grasslands, Savannas & Shrublands	7	AF07	66	Zambezian-Limpopo mixed woodlands	2.13	0	0	813	Afrotropic	{"type":"MultiPoint","coordinates":[]}	0	0	0	0	0	0
000000000000000001d9	Tropical & Subtropical Grasslands, Savannas & Shrublands	7	AU07	181	Arnhem Land tropical savanna	2.13	0	0	45	Australasia	{"type":"MultiPoint","coordinates":[]}	0	0	0	0	0	0
000000000000000001da	Tropical & Subtropical Grasslands, Savannas & Shrublands	7	AU07	182	Brigalow tropical savanna	2.13	0	0	82	Australasia	{"type":"MultiPoint","coordinates":[]}	0	0	0	0	0	0
000000000000000001db	Tropical & Subtropical Grasslands, Savannas & Shrublands	7	AU07	183	Cape York Peninsula tropical savanna	2.13	0	0	101	Australasia	{"type":"MultiPoint","coordinates":[]}	0	0	0	0	0	0
000000000000000001dc	Tropical & Subtropical Grasslands, Savannas & Shrublands	7	AU07	184	Carpentaria tropical savanna	2.13	0	0	108	Australasia	{"type":"MultiPoint","coordinates":[]}	0	0	0	0	0	0
000000000000000001dd	Tropical & Subtropical Grasslands, Savannas & Shrublands	7	AU07	185	Einasleigh upland savanna	2.13	0	0	247	Australasia	{"type":"MultiPoint","coordinates":[]}	0	0	0	0	0	0
000000000000000001de	Tropical & Subtropical Grasslands, Savannas & Shrublands	7	AU07	186	Kimberly tropical savanna	2.13	0	0	375	Australasia	{"type":"MultiPoint","coordinates":[]}	0	0	0	0	0	0
000000000000000001df	Tropical & Subtropical Grasslands, Savannas & Shrublands	7	AU07	187	Mitchell Grass Downs	2.13	0	0	447	Australasia	{"type":"MultiPoint","coordinates":[]}	0	0	0	0	0	0
1	Tropical & Subtropical Grasslands, Savannas & Shrublands	7	AU07	188	Trans Fly savanna and grasslands	2.13	0	0	752	Australasia	{"type":"MultiPoint","coordinates":[]}	0	0	0	0	0	0
10	Tropical & Subtropical Grasslands, Savannas & Shrublands	7	AU07	189	Victoria Plains tropical savanna	2.13	0	0	774	Australasia	{"type":"MultiPoint","coordinates":[]}	0	0	0	0	0	0
000000000000000002a5	Tropical & Subtropical Grasslands, Savannas & Shrublands	7	NE07	384	Western Gulf coastal grasslands	2.13	0	0	789	Nearctic	{"type":"MultiPoint","coordinates":[]}	0	0	0	0	0	0

## Sheet: ecoregions in historic range
FID_1	FID_1_1	OBJECTID	ECO_NAME	BIOME_NUM	BIOME_NAME	REALM	ECO_BIOME_	NNH	ECO_ID	SHAPE_LENG	SHAPE_AREA	NNH_NAME	COLOR	COLOR_BIO	COLOR_NNH	LICENSE	biome_zone	Count_hist	Count_mod	Count_sum	Range	Confidence	Focal	Divide	Rationale	TCL_histor	TCL_extirp	Zone
7	7	8	Alai-Western Tian Shan steppe	8	Temperate Grasslands, Savannas & Shrublands	Palearctic	PA08	4	721	33.9988	13.6729	Nature Imperiled	#FCEC35	#FEFF73	#EE1E23	CC-BY 4.0	0	6	0	6	Indigenous - resident	Uncertain	1			1	1	4
53	53	54	Azerbaijan shrub desert and steppe	13	Deserts & Xeric Shrublands	Palearctic	PA13	4	812	19.0203	6.7948	Nature Imperiled	#B7393D	#CC6767	#EE1E23	CC-BY 4.0	0	11	0	11	Indigenous - resident	Certain	1			1	1	4
55	55	56	Badghyz and Karabil semi-desert	13	Deserts & Xeric Shrublands	Palearctic	PA13	4	813	23.6056	13.466	Nature Imperiled	#B86847	#CC6767	#EE1E23	CC-BY 4.0	0	11	0	11	Indigenous - resident	Certain	0			1	1	4
79	79	81	Brahmaputra Valley semi-evergreen forests	1	Tropical & Subtropical Moist Broadleaf Forests	Indomalayan	IN01	4	222	17.6517	5.14102	Nature Imperiled	#5AA500	#38A700	#EE1E23	CC-BY 4.0	0	6	83	89	Indigenous - resident	Certain	0			1	0	1
107	107	109	Caspian Hyrcanian mixed forests	4	Temperate Broadleaf & Mixed Forests	Palearctic	PA04	3	649	28.4894	5.60417	Nature Could Recover	#71EB64	#00734C	#F9A91B	CC-BY 4.0	0	62	0	62	Indigenous - resident	Certain	0			1	1	4
112	112	114	Caucasus mixed forests	4	Temperate Broadleaf & Mixed Forests	Palearctic	PA04	3	650	51.1229	18.5165	Nature Could Recover	#38B529	#00734C	#F9A91B	CC-BY 4.0	0	12	0	12	Indigenous - resident	Certain	1			1	1	4
128	128	130	Central Asian northern desert	13	Deserts & Xeric Shrublands	Palearctic	PA13	2	817	152.364	75.4713	Nature Could Reach Half Protected	#DE8E59	#CC6767	#7BC141	CC-BY 4.0	0	19	0	19	Indigenous - resident	Certain	1		Desert - restricted to riparian areas only	1	1	4
129	129	131	Central Asian riparian woodlands	13	Deserts & Xeric Shrublands	Palearctic	PA13	3	818	67.8491	9.8943	Nature Could Recover	#D06F42	#CC6767	#F9A91B	CC-BY 4.0	0	14	0	14	Indigenous - resident	Certain	0			1	1	4
130	130	132	Central Asian southern desert	13	Deserts & Xeric Shrublands	Palearctic	PA13	4	819	73.3486	60.3621	Nature Imperiled	#F7BA4F	#CC6767	#EE1E23	CC-BY 4.0	0	12	0	12	Indigenous - resident	Certain	1		Desert - restricted to riparian areas only	1	1	4
134	134	136	Central China Loess Plateau mixed forests	4	Temperate Broadleaf & Mixed Forests	Palearctic	PA04	4	653	79.5541	37.1044	Nature Imperiled	#B2F693	#00734C	#EE1E23	CC-BY 4.0	0	199	0	199	Indigenous - resident	Certain	0			1	1	3
136	136	138	Central Deccan Plateau dry deciduous forests	2	Tropical & Subtropical Dry Broadleaf Forests	Indomalayan	IN02	4	290	32.1585	20.5288	Nature Imperiled	#B0C705	#CCCD65	#EE1E23	CC-BY 4.0	0	19	772	791	Indigenous - resident	Certain	0			1	0	1
139	139	141	Central Indochina dry forests	2	Tropical & Subtropical Dry Broadleaf Forests	Indomalayan	IN02	4	291	128.772	26.8734	Nature Imperiled	#73BD1E	#CCCD65	#EE1E23	CC-BY 4.0	0	14	9	23	Indigenous - resident	Certain	0			1	1	2
140	140	142	Central Korean deciduous forests	4	Temperate Broadleaf & Mixed Forests	Palearctic	PA04	4	655	50.5327	10.6163	Nature Imperiled	#88D97D	#00734C	#EE1E23	CC-BY 4.0	0	3	0	3	Indigenous - resident	Certain	1			1	1	3
153	153	155	Changbai Mountains mixed forests	4	Temperate Broadleaf & Mixed Forests	Palearctic	PA04	3	656	31.1536	10.1255	Nature Could Recover	#B3F7AC	#00734C	#F9A91B	CC-BY 4.0	0	13	0	13	Indigenous - resident	Certain	0			1	0	3
155	155	157	Chao Phraya freshwater swamp forests	1	Tropical & Subtropical Moist Broadleaf Forests	Indomalayan	IN01	4	224	20.0058	3.26114	Nature Imperiled	#98E500	#38A700	#EE1E23	CC-BY 4.0	0	0	0	0	Indigenous - resident	Certain	1		No tiger observations; swamp forest adjacent to upland areas	1	1	2
159	159	161	Chhota-Nagpur dry deciduous forests	2	Tropical & Subtropical Dry Broadleaf Forests	Indomalayan	IN02	4	292	22.841	10.8076	Nature Imperiled	#86D01B	#CCCD65	#EE1E23	CC-BY 4.0	0	5	16	21	Indigenous - resident	Certain	0			1	0	1
165	165	167	Chin Hills-Arakan Yoma montane forests	1	Tropical & Subtropical Moist Broadleaf Forests	Indomalayan	IN01	2	226	15.1463	2.58888	Nature Could Reach Half Protected	#4DE600	#38A700	#7BC141	CC-BY 4.0	0	0	0	0	Indigenous - resident	Uncertain	1		No tiger observations	1	0	1
197	197	199	Daba Mountains evergreen forests	4	Temperate Broadleaf & Mixed Forests	Palearctic	PA04	2	659	30.0755	15.9994	Nature Could Reach Half Protected	#82F178	#00734C	#7BC141	CC-BY 4.0	0	129	0	129	Indigenous - resident	Certain	0			1	1	3
213	213	216	East Deccan dry-evergreen forests	2	Tropical & Subtropical Dry Broadleaf Forests	Indomalayan	IN02	4	293	11.7196	2.11082	Nature Imperiled	#AEFA40	#CCCD65	#EE1E23	CC-BY 4.0	0	0	0	0	Indigenous - resident	Certain	1		No tiger observations	1	0	1
220	220	223	Eastern Anatolian montane steppe	8	Temperate Grasslands, Savannas & Shrublands	Palearctic	PA08	4	727	46.7146	17.4747	Nature Imperiled	#FDF674	#FEFF73	#EE1E23	CC-BY 4.0	0	10	0	10	Indigenous - resident	Certain	1			1	1	4
232	232	236	East Deccan moist deciduous forests	1	Tropical & Subtropical Moist Broadleaf Forests	Indomalayan	IN01	4	228	56.6921	29.4746	Nature Imperiled	#36C900	#38A700	#EE1E23	CC-BY 4.0	0	35	582	617	Indigenous - resident	Certain	0			1	0	1
233	233	237	Eastern Himalayan alpine shrub and meadows	10	Montane Grasslands & Shrublands	Palearctic	PA10	2	751	149.113	11.1613	Nature Could Reach Half Protected	#E8A382	#D6C39D	#7BC141	CC-BY 4.0	0	2	75	77	Indigenous - resident	Certain	0			1	0	1
234	234	238	Eastern Himalayan broadleaf forests	4	Temperate Broadleaf & Mixed Forests	Indomalayan	IN04	2	306	121.712	7.58236	Nature Could Reach Half Protected	#267300	#00734C	#7BC141	CC-BY 4.0	0	13	923	936	Indigenous - resident	Certain	0			1	0	1
235	235	239	Eastern Himalayan subalpine conifer forests	5	Temperate Conifer Forests	Indomalayan	IN05	2	309	111.848	2.51483	Nature Could Reach Half Protected	#92BA71	#458970	#7BC141	CC-BY 4.0	0	0	459	459	Indigenous - resident	Certain	0			1	0	1
236	236	240	Eastern Java-Bali montane rain forests	1	Tropical & Subtropical Moist Broadleaf Forests	Indomalayan	IN01	2	229	11.5596	1.29839	Nature Could Reach Half Protected	#304A00	#38A700	#7BC141	CC-BY 4.0	0	14	0	14	Indigenous - resident	Certain	0			1	1	2
244	244	248	Elburz Range forest steppe	5	Temperate Conifer Forests	Palearctic	PA05	4	695	41.1186	6.39534	Nature Imperiled	#339B42	#458970	#EE1E23	CC-BY 4.0	0	10	0	10	Indigenous - resident	Uncertain	1		Conifer forest	1	1	4
274	274	278	Gissaro-Alai open woodlands	8	Temperate Grasslands, Savannas & Shrublands	Palearctic	PA08	4	730	68.2981	17.7634	Nature Imperiled	#FCFA58	#FEFF73	#EE1E23	CC-BY 4.0	0	12	0	12	Indigenous - resident	Certain	0			1	1	4
275	275	279	Godavari-Krishna mangroves	13	Deserts & Xeric Shrublands	Indomalayan	IN13	4	316	16.5759	0.591343	Nature Imperiled	#E600AA	#CC6767	#EE1E23	CC-BY 4.0	0	0	0	0	Indigenous - resident	Certain	1		No tiger observations; mangroves adjacent to upland areas	1	0	1
294	294	298	Guizhou Plateau broadleaf and mixed forests	1	Tropical & Subtropical Moist Broadleaf Forests	Palearctic	PA01	3	642	39.0295	24.7305	Nature Could Recover	#267400	#38A700	#F9A91B	CC-BY 4.0	0	137	0	137	Indigenous - resident	Certain	0			1	1	2
298	298	302	Hainan Island monsoon rain forests	1	Tropical & Subtropical Moist Broadleaf Forests	Indomalayan	IN01	3	232	6.11018	1.33023	Nature Could Recover	#304A00	#38A700	#F9A91B	CC-BY 4.0	0	1	0	1	Indigenous - resident	Uncertain	1			1	1	2
305	305	309	Helanshan montane conifer forests	5	Temperate Conifer Forests	Palearctic	PA05	3	696	6.53356	2.55557	Nature Could Recover	#799F3C	#458970	#F9A91B	CC-BY 4.0	0	5	0	5	Indigenous - resident	Uncertain	1			1	1	3
306	306	310	Hengduan Mountains subalpine conifer forests	5	Temperate Conifer Forests	Palearctic	PA05	3	697	47.5868	9.21539	Nature Could Recover	#CCE065	#458970	#F9A91B	CC-BY 4.0	0	8	0	8	Indigenous - resident	Uncertain	1			1	1	1
310	310	314	Himalayan subtropical broadleaf forests	1	Tropical & Subtropical Moist Broadleaf Forests	Indomalayan	IN01	3	233	140.086	3.4865	Nature Could Recover	#304A00	#38A700	#F9A91B	CC-BY 4.0	0	10	509	519	Indigenous - resident	Certain	0			1	0	1
321	321	325	Huang He Plain mixed forests	4	Temperate Broadleaf & Mixed Forests	Palearctic	PA04	4	667	69.5935	43.2956	Nature Imperiled	#84AB7E	#00734C	#EE1E23	CC-BY 4.0	0	157	0	157	Indigenous - resident	Certain	0			1	1	3
337	337	341	Irrawaddy dry forests	2	Tropical & Subtropical Dry Broadleaf Forests	Indomalayan	IN02	4	294	14.0626	3.03496	Nature Imperiled	#98B414	#CCCD65	#EE1E23	CC-BY 4.0	0	1	0	1	Indigenous - resident	Certain	1			1	0	1
338	338	342	Irrawaddy freshwater swamp forests	1	Tropical & Subtropical Moist Broadleaf Forests	Indomalayan	IN01	4	234	6.36468	1.2807	Nature Imperiled	#004600	#38A700	#EE1E23	CC-BY 4.0	0	0	0	0	Indigenous - resident	Certain	1		No tiger observations; swamp forest adjacent to upland areas	1	0	1
339	339	343	Irrawaddy moist deciduous forests	1	Tropical & Subtropical Moist Broadleaf Forests	Indomalayan	IN01	4	235	47.4946	12.0092	Nature Imperiled	#4C7300	#38A700	#EE1E23	CC-BY 4.0	0	9	0	9	Indigenous - resident	Certain	1			1	0	1
362	362	366	Kayah-Karen montane rain forests	1	Tropical & Subtropical Moist Broadleaf Forests	Indomalayan	IN01	2	237	30.9776	10.1855	Nature Could Reach Half Protected	#23DB01	#38A700	#7BC141	CC-BY 4.0	0	4	49	53	Indigenous - resident	Certain	0			1	0	2
375	375	380	Kopet Dag semi-desert	13	Deserts & Xeric Shrublands	Palearctic	PA13	2	829	16.6503	2.70801	Nature Could Reach Half Protected	#FAD354	#CC6767	#7BC141	CC-BY 4.0	0	7	0	7	Indigenous - resident	Uncertain	1			1	1	4
376	376	381	Kopet Dag woodlands and forest steppe	10	Montane Grasslands & Shrublands	Palearctic	PA10	3	756	19.0191	5.96729	Nature Could Recover	#D57739	#D6C39D	#F9A91B	CC-BY 4.0	0	7	0	7	Indigenous - resident	Certain	1			1	1	4
389	389	394	Lower Gangetic Plains moist deciduous forests	1	Tropical & Subtropical Moist Broadleaf Forests	Indomalayan	IN01	4	238	47.6093	22.6149	Nature Imperiled	#267400	#38A700	#EE1E23	CC-BY 4.0	0	14	10	24	Indigenous - resident	Certain	0			1	0	1
390	390	395	Luang Prabang montane rain forests	1	Tropical & Subtropical Moist Broadleaf Forests	Indomalayan	IN01	2	239	24.482	6.12632	Nature Could Reach Half Protected	#70A800	#38A700	#7BC141	CC-BY 4.0	0	2	4	6	Indigenous - resident	Certain	1			1	1	2
408	408	413	Malabar Coast moist forests	1	Tropical & Subtropical Moist Broadleaf Forests	Indomalayan	IN01	4	242	34.7084	2.95022	Nature Imperiled	#267400	#38A700	#EE1E23	CC-BY 4.0	0	0	0	0	Indigenous - resident	Certain	1		No tiger observations	1	0	1
411	411	416	Manchurian mixed forests	4	Temperate Broadleaf & Mixed Forests	Palearctic	PA04	3	669	155.464	59.2372	Nature Could Recover	#87BD7F	#00734C	#F9A91B	CC-BY 4.0	0	59	103	162	Indigenous - resident	Certain	0			1	0	3
428	428	433	Meghalaya subtropical forests	1	Tropical & Subtropical Moist Broadleaf Forests	Indomalayan	IN01	3	244	10.4674	3.74469	Nature Could Recover	#4C5801	#38A700	#F9A91B	CC-BY 4.0	0	2	8	10	Indigenous - resident	Certain	1			1	0	1
443	443	448	Mizoram-Manipur-Kachin rain forests	1	Tropical & Subtropical Moist Broadleaf Forests	Indomalayan	IN01	2	249	43.9958	11.9994	Nature Could Reach Half Protected	#36C900	#38A700	#7BC141	CC-BY 4.0	0	8	218	226	Indigenous - resident	Certain	0			1	0	1
462	462	467	Narmada Valley dry deciduous forests	2	Tropical & Subtropical Dry Broadleaf Forests	Indomalayan	IN02	4	296	37.9947	14.9064	Nature Imperiled	#9EED42	#CCCD65	#EE1E23	CC-BY 4.0	0	6	604	610	Indigenous - resident	Certain	0			1	0	1
489	489	494	North Western Ghats moist deciduous forests	1	Tropical & Subtropical Moist Broadleaf Forests	Indomalayan	IN01	4	253	37.6119	4.08827	Nature Imperiled	#6AB800	#38A700	#EE1E23	CC-BY 4.0	0	3	35	38	Indigenous - resident	Certain	0			1	0	1
490	490	495	North Western Ghats montane rain forests	1	Tropical & Subtropical Moist Broadleaf Forests	Indomalayan	IN01	3	254	18.4711	2.59522	Nature Could Recover	#1F8E00	#38A700	#F9A91B	CC-BY 4.0	0	4	78	82	Indigenous - resident	Certain	0			1	0	1
491	491	496	Northeast China Plain deciduous forests	4	Temperate Broadleaf & Mixed Forests	Palearctic	PA04	4	673	93.9606	26.0696	Nature Imperiled	#7CA55F	#00734C	#EE1E23	CC-BY 4.0	0	42	0	42	Indigenous - resident	Certain	0			1	1	3
492	492	497	Northeast India-Myanmar pine forests	3	Tropical & Subtropical Coniferous Forests	Indomalayan	IN03	2	304	7.1131	0.869496	Nature Could Reach Half Protected	#50AA60	#88CE66	#7BC141	CC-BY 4.0	0	0	0	0	Indigenous - resident	Uncertain	1		No tiger observations	1	0	1
497	497	502	Northeast Himalayan subalpine conifer forests	5	Temperate Conifer Forests	Palearctic	PA05	3	702	60.0939	4.29929	Nature Could Recover	#81B256	#458970	#F9A91B	CC-BY 4.0	0	4	2	6	Indigenous - resident	Certain	1			1	0	1
503	503	508	Northern Annamites rain forests	1	Tropical & Subtropical Moist Broadleaf Forests	Indomalayan	IN01	2	255	13.6311	4.00868	Nature Could Reach Half Protected	#4F8700	#38A700	#7BC141	CC-BY 4.0	0	2	1	3	Indigenous - resident	Certain	1			1	1	2
507	507	512	North Deccan dry deciduous forests	2	Tropical & Subtropical Dry Broadleaf Forests	Indomalayan	IN02	4	297	16.1764	5.03601	Nature Imperiled	#9CD940	#CCCD65	#EE1E23	CC-BY 4.0	0	4	0	4	Indigenous - resident	Certain	1			1	0	1
508	508	513	Northern Indochina subtropical forests	1	Tropical & Subtropical Moist Broadleaf Forests	Indomalayan	IN01	3	256	56.1993	38.1808	Nature Could Recover	#98E500	#38A700	#F9A91B	CC-BY 4.0	0	48	22	70	Indigenous - resident	Certain	0	Divide along Myanmar border for extirpated		1	1	2
509	509	514	Northern Khorat Plateau moist deciduous forests	1	Tropical & Subtropical Moist Broadleaf Forests	Indomalayan	IN01	4	257	11.4695	1.43237	Nature Imperiled	#82F178	#38A700	#EE1E23	CC-BY 4.0	0	2	0	2	Indigenous - resident	Certain	1			1	1	2
516	516	521	Northern Thailand-Laos moist deciduous forests	1	Tropical & Subtropical Moist Broadleaf Forests	Indomalayan	IN01	3	258	26.2447	3.59528	Nature Could Recover	#4C7300	#38A700	#F9A91B	CC-BY 4.0	0	0	0	0	Indigenous - resident	Certain	1		No tiger observations	1	1	2
517	517	522	Northern Triangle subtropical forests	1	Tropical & Subtropical Moist Broadleaf Forests	Indomalayan	IN01	2	259	15.9247	4.86171	Nature Could Reach Half Protected	#004600	#38A700	#7BC141	CC-BY 4.0	0	0	26	26	Indigenous - resident	Certain	0			1	0	1
518	518	523	Northern Triangle temperate forests	4	Temperate Broadleaf & Mixed Forests	Indomalayan	IN04	2	307	12.6031	0.97637	Nature Could Reach Half Protected	#71C668	#00734C	#7BC141	CC-BY 4.0	0	1	14	15	Indigenous - resident	Certain	0			1	0	1
527	527	532	Aravalli west thorn scrub forests	13	Deserts & Xeric Shrublands	Indomalayan	IN13	4	314	121.583	44.7386	Nature Imperiled	#E67938	#CC6767	#EE1E23	CC-BY 4.0	0	12	0	12	Indigenous - resident	Certain	0			1	1	1
529	529	534	Nujiang Langcang Gorge alpine conifer and mixed forests	5	Temperate Conifer Forests	Palearctic	PA05	3	704	47.9489	7.66884	Nature Could Recover	#44C43C	#458970	#F9A91B	CC-BY 4.0	0	10	0	10	Indigenous - resident	Certain	0			1	0	1
537	537	542	Ordos Plateau steppe	10	Montane Grasslands & Shrublands	Palearctic	PA10	4	761	30.9031	22.1587	Nature Imperiled	#F7A86D	#D6C39D	#EE1E23	CC-BY 4.0	0	20	0	20	Indigenous - resident	Certain	0			1	1	3
540	540	545	Orissa semi-evergreen forests	1	Tropical & Subtropical Moist Broadleaf Forests	Indomalayan	IN01	4	261	7.86978	1.92186	Nature Imperiled	#269400	#38A700	#EE1E23	CC-BY 4.0	0	1	0	1	Indigenous - resident	Certain	1			1	0	1
558	558	563	Peninsular Malaysian montane rain forests	1	Tropical & Subtropical Moist Broadleaf Forests	Indomalayan	IN01	2	263	16.7045	1.39396	Nature Could Reach Half Protected	#267400	#38A700	#7BC141	CC-BY 4.0	0	1	8	9	Indigenous - resident	Certain	1			1	0	2
559	559	564	Peninsular Malaysian peat swamp forests	1	Tropical & Subtropical Moist Broadleaf Forests	Indomalayan	IN01	2	264	8.09345	0.293744	Nature Could Reach Half Protected	#6C9400	#38A700	#7BC141	CC-BY 4.0	0	0	0	0	Indigenous - resident	Certain	1		No tiger observations; peat forest adjacent to upland areas	1	0	2
580	580	585	Qin Ling Mountains deciduous forests	4	Temperate Broadleaf & Mixed Forests	Palearctic	PA04	3	677	27.5036	11.9673	Nature Could Recover	#88DF50	#00734C	#F9A91B	CC-BY 4.0	0	42	0	42	Indigenous - resident	Certain	0			1	1	3
581	581	586	Qionglai-Minshan conifer forests	5	Temperate Conifer Forests	Palearctic	PA05	3	706	30.7857	7.53888	Nature Could Recover	#29A26C	#458970	#F9A91B	CC-BY 4.0	0	36	0	36	Indigenous - resident	Certain	0			1	1	3
586	586	591	Red River freshwater swamp forests	1	Tropical & Subtropical Moist Broadleaf Forests	Indomalayan	IN01	4	266	8.28944	0.930627	Nature Imperiled	#36C900	#38A700	#EE1E23	CC-BY 4.0	0	0	0	0	Indigenous - resident	Uncertain	1		No tiger observations; swamp forest adjacent to upland areas	1	1	2
619	619	624	Sichuan Basin evergreen broadleaf forests	4	Temperate Broadleaf & Mixed Forests	Palearctic	PA04	4	680	15.9202	9.18215	Nature Imperiled	#70A800	#00734C	#EE1E23	CC-BY 4.0	0	74	0	74	Indigenous - resident	Certain	0			1	1	3
646	646	651	South Deccan Plateau dry deciduous forests	2	Tropical & Subtropical Dry Broadleaf Forests	Indomalayan	IN02	4	298	18.0744	6.79462	Nature Imperiled	#98FA05	#CCCD65	#EE1E23	CC-BY 4.0	0	4	132	136	Indigenous - resident	Certain	0			1	0	1
655	655	660	South Western Ghats moist deciduous forests	1	Tropical & Subtropical Moist Broadleaf Forests	Indomalayan	IN01	3	270	23.2136	1.95733	Nature Could Recover	#47B700	#38A700	#F9A91B	CC-BY 4.0	0	1	378	379	Indigenous - resident	Certain	0			1	0	1
656	656	661	South Western Ghats montane rain forests	1	Tropical & Subtropical Moist Broadleaf Forests	Indomalayan	IN01	2	271	12.5287	1.86477	Nature Could Reach Half Protected	#004600	#38A700	#7BC141	CC-BY 4.0	0	5	301	306	Indigenous - resident	Certain	0			1	0	1
659	659	664	Southeast Tibet shrublands and meadows	10	Montane Grasslands & Shrublands	Palearctic	PA10	3	765	179.585	44.2752	Nature Could Recover	#D5642C	#D6C39D	#F9A91B	CC-BY 4.0	0	28	0	28	Indigenous - resident	Certain	0			1	1	1
663	663	668	Southeast Indochina dry evergreen forests	2	Tropical & Subtropical Dry Broadleaf Forests	Indomalayan	IN02	3	299	70.3793	10.3248	Nature Could Recover	#BCD72A	#CCCD65	#F9A91B	CC-BY 4.0	0	7	62	69	Indigenous - resident	Certain	0			1	1	2
670	670	675	Southern Annamites montane rain forests	1	Tropical & Subtropical Moist Broadleaf Forests	Indomalayan	IN01	2	272	33.0294	3.87887	Nature Could Reach Half Protected	#98E500	#38A700	#7BC141	CC-BY 4.0	0	6	0	6	Indigenous - resident	Certain	1			1	1	2
698	698	703	Suiphun-Khanka meadows and forest meadows	9	Flooded Grasslands & Savannas	Palearctic	PA09	3	746	11.3821	3.87306	Nature Could Recover	#6BD3FA	#BEE7FF	#F9A91B	CC-BY 4.0	0	6	6	12	Indigenous - resident	Certain	0			1	0	3
702	702	708	Sumatran freshwater swamp forests	1	Tropical & Subtropical Moist Broadleaf Forests	Indomalayan	IN01	3	277	34.3454	1.46362	Nature Could Recover	#47B700	#38A700	#F9A91B	CC-BY 4.0	0	0	0	0	Indigenous - resident	Certain	1		No tiger observations; swamp forest adjacent to upland areas	1	0	2
704	704	710	Sumatran montane rain forests	1	Tropical & Subtropical Moist Broadleaf Forests	Indomalayan	IN01	2	279	55.3081	5.90867	Nature Could Reach Half Protected	#4C5400	#38A700	#7BC141	CC-BY 4.0	0	16	45	61	Indigenous - resident	Certain	0			1	0	2
705	705	711	Sumatran peat swamp forests	1	Tropical & Subtropical Moist Broadleaf Forests	Indomalayan	IN01	3	280	51.725	7.08219	Nature Could Recover	#267400	#38A700	#F9A91B	CC-BY 4.0	0	6	2	8	Indigenous - resident	Certain	1			1	0	2
706	706	712	Sumatran tropical pine forests	3	Tropical & Subtropical Coniferous Forests	Indomalayan	IN03	2	305	5.58465	0.223724	Nature Could Reach Half Protected	#4BD671	#88CE66	#7BC141	CC-BY 4.0	0	0	1	1	Indigenous - resident	Certain	1		Conifer forest	1	0	2
710	710	716	Sundarbans freshwater swamp forests	1	Tropical & Subtropical Moist Broadleaf Forests	Indomalayan	IN01	4	282	8.14649	1.27682	Nature Imperiled	#5AA500	#38A700	#EE1E23	CC-BY 4.0	0	1	0	1	Indigenous - resident	Certain	1		Swamp forest adjacent to upland areas	1	0	1
711	711	717	Sundarbans mangroves	14	Mangroves	Indomalayan	IN14	3	323	32.2788	1.78502	Nature Could Recover	#E600AA	#FE01C4	#F9A91B	CC-BY 4.0	0	1	432	433	Indigenous - resident	Certain	0			1	0	1
717	717	723	Taklimakan desert	13	Deserts & Xeric Shrublands	Palearctic	PA13	3	843	81.7648	78.3785	Nature Could Recover	#FFAA01	#CC6767	#F9A91B	CC-BY 4.0	0	11	0	11	Indigenous - resident	Certain	0		Riparian areas only below 4500 m	1	1	4
728	728	734	Terai-Duar savanna and grasslands	7	Tropical & Subtropical Grasslands, Savannas & Shrublands	Indomalayan	IN07	4	311	27.3418	3.15366	Nature Imperiled	#FCD844	#FEAA01	#EE1E23	CC-BY 4.0	0	2	435	437	Indigenous - resident	Certain	0			1	0	1
731	731	737	Tian Shan foothill arid steppe	8	Temperate Grasslands, Savannas & Shrublands	Palearctic	PA08	3	740	68.8411	14.3347	Nature Could Recover	#FCC73D	#FEFF73	#F9A91B	CC-BY 4.0	0	7	0	7	Indigenous - resident	Uncertain	1			1	1	4
732	732	738	Tian Shan montane conifer forests	5	Temperate Conifer Forests	Palearctic	PA05	4	709	49.7036	3.04294	Nature Imperiled	#60A65D	#458970	#EE1E23	CC-BY 4.0	0	2	0	2	Indigenous - resident	Uncertain	1			1	1	4
733	733	739	Tian Shan montane steppe and meadows	10	Montane Grasslands & Shrublands	Palearctic	PA10	2	767	115.64	30.8483	Nature Could Reach Half Protected	#DBA859	#D6C39D	#7BC141	CC-BY 4.0	0	8	0	8	Indigenous - resident	Uncertain	1			1	1	4
740	740	746	Tonle Sap-Mekong peat swamp forests	1	Tropical & Subtropical Moist Broadleaf Forests	Indomalayan	IN01	4	286	23.4376	2.42033	Nature Imperiled	#82F178	#38A700	#EE1E23	CC-BY 4.0	0	2	0	2	Indigenous - resident	Certain	1			1	1	2
741	741	747	Tonle Sap freshwater swamp forests	1	Tropical & Subtropical Moist Broadleaf Forests	Indomalayan	IN01	4	285	23.5713	2.14964	Nature Imperiled	#267400	#38A700	#EE1E23	CC-BY 4.0	0	1	0	1	Indigenous - resident	Uncertain	1		Swamp forest adjacent to upland areas	1	1	2
757	757	763	Upper Gangetic Plains moist deciduous forests	1	Tropical & Subtropical Moist Broadleaf Forests	Indomalayan	IN01	4	287	24.6778	23.8954	Nature Imperiled	#70A800	#38A700	#EE1E23	CC-BY 4.0	0	12	195	207	Indigenous - resident	Certain	0			1	0	1
761	761	767	Ussuri broadleaf and mixed forests	4	Temperate Broadleaf & Mixed Forests	Palearctic	PA04	2	685	46.9432	23.3248	Nature Could Reach Half Protected	#78F053	#00734C	#7BC141	CC-BY 4.0	0	75	508	583	Indigenous - resident	Certain	0			1	0	3
787	787	793	Western Java montane rain forests	1	Tropical & Subtropical Moist Broadleaf Forests	Indomalayan	IN01	2	288	10.6124	2.14212	Nature Could Reach Half Protected	#6C9400	#38A700	#7BC141	CC-BY 4.0	0	39	0	39	Indigenous - resident	Certain	0			1	1	2
805	805	811	Yunnan Plateau subtropical evergreen forests	1	Tropical & Subtropical Moist Broadleaf Forests	Palearctic	PA01	4	643	29.7124	21.5294	Nature Imperiled	#5AA500	#38A700	#EE1E23	CC-BY 4.0	0	94	0	94	Indigenous - resident	Certain	0			1	1	2
238	238	242	Eastern Mediterranean conifer-broadleaf forests	12	Mediterranean Forests, Woodlands & Scrub	Palearctic	PA12	4	791	107.355	14.2211	Nature Imperiled	#F5A27A	#FE0000	#EE1E23	CC-BY 4.0	0	7	0	7	Indigenous - resident	Certain	1	Eastern Turkey	Divide at Euphrates River; east = indigenous (resident), west = not range	1	1	4
8	8	9	Alashan Plateau semi-desert	13	Deserts & Xeric Shrublands	Palearctic	PA13	2	808	75.5064	72.7247	Nature Could Reach Half Protected	#F9AB58	#CC6767	#7BC141	CC-BY 4.0	0	14	0	14	Indigenous - resident	Certain	1	Southern portion only	Semi-desert; riparian areas only	1	1	4
445	445	450	Mongolian-Manchurian grassland	8	Temperate Grasslands, Savannas & Shrublands	Palearctic	PA08	3	734	134.477	103.136	Nature Could Recover	#F6FC38	#FEFF73	#F9A91B	CC-BY 4.0	0	37	0	37	Indigenous - resident	Certain	1		Riparian zones only?	1	1	3
785	785	791	Western Himalayan broadleaf forests	4	Temperate Broadleaf & Mixed Forests	Indomalayan	IN04	3	308	65.6045	5.34955	Nature Could Recover	#57E843	#00734C	#F9A91B	CC-BY 4.0	0	1	0	1	Indigenous - resident	Uncertain	1			1	0	1
785	785	791	Western Himalayan broadleaf forests	4	Temperate Broadleaf & Mixed Forests	Indomalayan	IN04	3	308	65.6045	5.34955	Nature Could Recover	#57E843	#00734C	#F9A91B	CC-BY 4.0	0	1	0	1	Indigenous - resident	Uncertain	1			1	0	1
785	785	791	Western Himalayan broadleaf forests	4	Temperate Broadleaf & Mixed Forests	Indomalayan	IN04	3	308	65.6045	5.34955	Nature Could Recover	#57E843	#00734C	#F9A91B	CC-BY 4.0	0	1	0	1	Indigenous - resident	Uncertain	1			1	0	1
785	785	791	Western Himalayan broadleaf forests	4	Temperate Broadleaf & Mixed Forests	Indomalayan	IN04	3	308	65.6045	5.34955	Nature Could Recover	#57E843	#00734C	#F9A91B	CC-BY 4.0	0	1	0	1	Indigenous - resident	Uncertain	1			1	0	1
785	785	791	Western Himalayan broadleaf forests	4	Temperate Broadleaf & Mixed Forests	Indomalayan	IN04	3	308	65.6045	5.34955	Nature Could Recover	#57E843	#00734C	#F9A91B	CC-BY 4.0	0	1	0	1	Indigenous - resident	Uncertain	1			1	0	1
785	785	791	Western Himalayan broadleaf forests	4	Temperate Broadleaf & Mixed Forests	Indomalayan	IN04	3	308	65.6045	5.34955	Nature Could Recover	#57E843	#00734C	#F9A91B	CC-BY 4.0	0	1	0	1	Indigenous - resident	Uncertain	1			1	0	1
785	785	791	Western Himalayan broadleaf forests	4	Temperate Broadleaf & Mixed Forests	Indomalayan	IN04	3	308	65.6045	5.34955	Nature Could Recover	#57E843	#00734C	#F9A91B	CC-BY 4.0	0	1	0	1	Indigenous - resident	Uncertain	1			1	0	1
785	785	791	Western Himalayan broadleaf forests	4	Temperate Broadleaf & Mixed Forests	Indomalayan	IN04	3	308	65.6045	5.34955	Nature Could Recover	#57E843	#00734C	#F9A91B	CC-BY 4.0	0	1	0	1	Indigenous - resident	Uncertain	1			1	0	1
785	785	791	Western Himalayan broadleaf forests	4	Temperate Broadleaf & Mixed Forests	Indomalayan	IN04	3	308	65.6045	5.34955	Nature Could Recover	#57E843	#00734C	#F9A91B	CC-BY 4.0	0	1	0	1	Indigenous - resident	Uncertain	1			1	0	1
785	785	791	Western Himalayan broadleaf forests	4	Temperate Broadleaf & Mixed Forests	Indomalayan	IN04	3	308	65.6045	5.34955	Nature Could Recover	#57E843	#00734C	#F9A91B	CC-BY 4.0	0	1	0	1	Indigenous - resident	Uncertain	1			1	0	1
785	785	791	Western Himalayan broadleaf forests	4	Temperate Broadleaf & Mixed Forests	Indomalayan	IN04	3	308	65.6045	5.34955	Nature Could Recover	#57E843	#00734C	#F9A91B	CC-BY 4.0	0	1	0	1	Indigenous - resident	Uncertain	1			1	0	1
785	785	791	Western Himalayan broadleaf forests	4	Temperate Broadleaf & Mixed Forests	Indomalayan	IN04	3	308	65.6045	5.34955	Nature Could Recover	#57E843	#00734C	#F9A91B	CC-BY 4.0	0	1	0	1	Indigenous - resident	Uncertain	1			1	0	1
785	785	791	Western Himalayan broadleaf forests	4	Temperate Broadleaf & Mixed Forests	Indomalayan	IN04	3	308	65.6045	5.34955	Nature Could Recover	#57E843	#00734C	#F9A91B	CC-BY 4.0	0	1	0	1	Indigenous - resident	Uncertain	1			1	0	1
108	108	110	Caspian lowland desert	13	Deserts & Xeric Shrublands	Palearctic	PA13	3	815	74.6646	31.3332	Nature Could Recover	#B85349	#CC6767	#F9A91B	CC-BY 4.0	0	6	0	6	Indigenous - resident	Uncertain	1	Divide recognizing northern and southern sections	Deserts - riparian areas only	1	1	4
108	108	110	Caspian lowland desert	13	Deserts & Xeric Shrublands	Palearctic	PA13	3	815	74.6646	31.3332	Nature Could Recover	#B85349	#CC6767	#F9A91B	CC-BY 4.0	0	6	0	6	Indigenous - resident	Uncertain	1	Divide recognizing northern and southern sections	Deserts - riparian areas only	1	1	4
708	708	714	Sunda Shelf mangroves	14	Mangroves	Indomalayan	IN14	2	322	157.401	3.03281	Nature Could Reach Half Protected	#E600AA	#FE01C4	#7BC141	CC-BY 4.0	0	2	0	2	Indigenous - resident	Certain	1			1	0	2
708	708	714	Sunda Shelf mangroves	14	Mangroves	Indomalayan	IN14	2	322	157.401	3.03281	Nature Could Reach Half Protected	#E600AA	#FE01C4	#7BC141	CC-BY 4.0	0	2	0	2	Indigenous - resident	Certain	1			1	0	2
708	708	714	Sunda Shelf mangroves	14	Mangroves	Indomalayan	IN14	2	322	157.401	3.03281	Nature Could Reach Half Protected	#E600AA	#FE01C4	#7BC141	CC-BY 4.0	0	2	0	2	Indigenous - resident	Certain	1			1	0	2
708	708	714	Sunda Shelf mangroves	14	Mangroves	Indomalayan	IN14	2	322	157.401	3.03281	Nature Could Reach Half Protected	#E600AA	#FE01C4	#7BC141	CC-BY 4.0	0	2	0	2	Indigenous - resident	Certain	1			1	0	2
708	708	714	Sunda Shelf mangroves	14	Mangroves	Indomalayan	IN14	2	322	157.401	3.03281	Nature Could Reach Half Protected	#E600AA	#FE01C4	#7BC141	CC-BY 4.0	0	2	0	2	Indigenous - resident	Certain	1			1	0	2
708	708	714	Sunda Shelf mangroves	14	Mangroves	Indomalayan	IN14	2	322	157.401	3.03281	Nature Could Reach Half Protected	#E600AA	#FE01C4	#7BC141	CC-BY 4.0	0	2	0	2	Indigenous - resident	Certain	1			1	0	2
708	708	714	Sunda Shelf mangroves	14	Mangroves	Indomalayan	IN14	2	322	157.401	3.03281	Nature Could Reach Half Protected	#E600AA	#FE01C4	#7BC141	CC-BY 4.0	0	2	0	2	Indigenous - resident	Certain	1			1	0	2
708	708	714	Sunda Shelf mangroves	14	Mangroves	Indomalayan	IN14	2	322	157.401	3.03281	Nature Could Reach Half Protected	#E600AA	#FE01C4	#7BC141	CC-BY 4.0	0	2	0	2	Indigenous - resident	Certain	1			1	0	2
708	708	714	Sunda Shelf mangroves	14	Mangroves	Indomalayan	IN14	2	322	157.401	3.03281	Nature Could Reach Half Protected	#E600AA	#FE01C4	#7BC141	CC-BY 4.0	0	2	0	2	Indigenous - resident	Certain	1			1	0	2
708	708	714	Sunda Shelf mangroves	14	Mangroves	Indomalayan	IN14	2	322	157.401	3.03281	Nature Could Reach Half Protected	#E600AA	#FE01C4	#7BC141	CC-BY 4.0	0	2	0	2	Indigenous - resident	Certain	1			1	0	2
708	708	714	Sunda Shelf mangroves	14	Mangroves	Indomalayan	IN14	2	322	157.401	3.03281	Nature Could Reach Half Protected	#E600AA	#FE01C4	#7BC141	CC-BY 4.0	0	2	0	2	Indigenous - resident	Certain	1			1	0	2
708	708	714	Sunda Shelf mangroves	14	Mangroves	Indomalayan	IN14	2	322	157.401	3.03281	Nature Could Reach Half Protected	#E600AA	#FE01C4	#7BC141	CC-BY 4.0	0	2	0	2	Indigenous - resident	Certain	1			1	0	2
708	708	714	Sunda Shelf mangroves	14	Mangroves	Indomalayan	IN14	2	322	157.401	3.03281	Nature Could Reach Half Protected	#E600AA	#FE01C4	#7BC141	CC-BY 4.0	0	2	0	2	Indigenous - resident	Certain	1			1	0	2
708	708	714	Sunda Shelf mangroves	14	Mangroves	Indomalayan	IN14	2	322	157.401	3.03281	Nature Could Reach Half Protected	#E600AA	#FE01C4	#7BC141	CC-BY 4.0	0	2	0	2	Indigenous - resident	Certain	1			1	0	2
708	708	714	Sunda Shelf mangroves	14	Mangroves	Indomalayan	IN14	2	322	157.401	3.03281	Nature Could Reach Half Protected	#E600AA	#FE01C4	#7BC141	CC-BY 4.0	0	2	0	2	Indigenous - resident	Certain	1			1	0	2
708	708	714	Sunda Shelf mangroves	14	Mangroves	Indomalayan	IN14	2	322	157.401	3.03281	Nature Could Reach Half Protected	#E600AA	#FE01C4	#7BC141	CC-BY 4.0	0	2	0	2	Indigenous - resident	Certain	1			1	0	2
708	708	714	Sunda Shelf mangroves	14	Mangroves	Indomalayan	IN14	2	322	157.401	3.03281	Nature Could Reach Half Protected	#E600AA	#FE01C4	#7BC141	CC-BY 4.0	0	2	0	2	Indigenous - resident	Certain	1			1	0	2
708	708	714	Sunda Shelf mangroves	14	Mangroves	Indomalayan	IN14	2	322	157.401	3.03281	Nature Could Reach Half Protected	#E600AA	#FE01C4	#7BC141	CC-BY 4.0	0	2	0	2	Indigenous - resident	Certain	1			1	0	2
708	708	714	Sunda Shelf mangroves	14	Mangroves	Indomalayan	IN14	2	322	157.401	3.03281	Nature Could Reach Half Protected	#E600AA	#FE01C4	#7BC141	CC-BY 4.0	0	2	0	2	Indigenous - resident	Certain	1			1	0	2
708	708	714	Sunda Shelf mangroves	14	Mangroves	Indomalayan	IN14	2	322	157.401	3.03281	Nature Could Reach Half Protected	#E600AA	#FE01C4	#7BC141	CC-BY 4.0	0	2	0	2	Indigenous - resident	Certain	1			1	0	2
708	708	714	Sunda Shelf mangroves	14	Mangroves	Indomalayan	IN14	2	322	157.401	3.03281	Nature Could Reach Half Protected	#E600AA	#FE01C4	#7BC141	CC-BY 4.0	0	2	0	2	Indigenous - resident	Certain	1			1	0	2
708	708	714	Sunda Shelf mangroves	14	Mangroves	Indomalayan	IN14	2	322	157.401	3.03281	Nature Could Reach Half Protected	#E600AA	#FE01C4	#7BC141	CC-BY 4.0	0	2	0	2	Indigenous - resident	Certain	1			1	0	2
708	708	714	Sunda Shelf mangroves	14	Mangroves	Indomalayan	IN14	2	322	157.401	3.03281	Nature Could Reach Half Protected	#E600AA	#FE01C4	#7BC141	CC-BY 4.0	0	2	0	2	Indigenous - resident	Certain	1			1	0	2
708	708	714	Sunda Shelf mangroves	14	Mangroves	Indomalayan	IN14	2	322	157.401	3.03281	Nature Could Reach Half Protected	#E600AA	#FE01C4	#7BC141	CC-BY 4.0	0	2	0	2	Indigenous - resident	Certain	1			1	0	2
708	708	714	Sunda Shelf mangroves	14	Mangroves	Indomalayan	IN14	2	322	157.401	3.03281	Nature Could Reach Half Protected	#E600AA	#FE01C4	#7BC141	CC-BY 4.0	0	2	0	2	Indigenous - resident	Certain	1			1	0	2
708	708	714	Sunda Shelf mangroves	14	Mangroves	Indomalayan	IN14	2	322	157.401	3.03281	Nature Could Reach Half Protected	#E600AA	#FE01C4	#7BC141	CC-BY 4.0	0	2	0	2	Indigenous - resident	Certain	1			1	0	2
708	708	714	Sunda Shelf mangroves	14	Mangroves	Indomalayan	IN14	2	322	157.401	3.03281	Nature Could Reach Half Protected	#E600AA	#FE01C4	#7BC141	CC-BY 4.0	0	2	0	2	Indigenous - resident	Certain	1			1	0	2
708	708	714	Sunda Shelf mangroves	14	Mangroves	Indomalayan	IN14	2	322	157.401	3.03281	Nature Could Reach Half Protected	#E600AA	#FE01C4	#7BC141	CC-BY 4.0	0	2	0	2	Indigenous - resident	Certain	1			1	0	2
708	708	714	Sunda Shelf mangroves	14	Mangroves	Indomalayan	IN14	2	322	157.401	3.03281	Nature Could Reach Half Protected	#E600AA	#FE01C4	#7BC141	CC-BY 4.0	0	2	0	2	Indigenous - resident	Certain	1			1	0	2
708	708	714	Sunda Shelf mangroves	14	Mangroves	Indomalayan	IN14	2	322	157.401	3.03281	Nature Could Reach Half Protected	#E600AA	#FE01C4	#7BC141	CC-BY 4.0	0	2	0	2	Indigenous - resident	Certain	1			1	0	2
708	708	714	Sunda Shelf mangroves	14	Mangroves	Indomalayan	IN14	2	322	157.401	3.03281	Nature Could Reach Half Protected	#E600AA	#FE01C4	#7BC141	CC-BY 4.0	0	2	0	2	Indigenous - resident	Certain	1			1	0	2
644	644	649	South China-Vietnam subtropical evergreen forests	1	Tropical & Subtropical Moist Broadleaf Forests	Indomalayan	IN01	4	268	104.872	19.6	Nature Imperiled	#70A800	#38A700	#EE1E23	CC-BY 4.0	0	237	0	237	Indigenous - resident	Certain	1	seperate out Hainan portion		1	1	2
644	644	649	South China-Vietnam subtropical evergreen forests	1	Tropical & Subtropical Moist Broadleaf Forests	Indomalayan	IN01	4	268	104.872	19.6	Nature Imperiled	#70A800	#38A700	#EE1E23	CC-BY 4.0	0	237	0	237	Indigenous - resident	Certain	1	seperate out Hainan portion		1	1	2
644	644	649	South China-Vietnam subtropical evergreen forests	1	Tropical & Subtropical Moist Broadleaf Forests	Indomalayan	IN01	4	268	104.872	19.6	Nature Imperiled	#70A800	#38A700	#EE1E23	CC-BY 4.0	0	237	0	237	Indigenous - resident	Certain	1	seperate out Hainan portion		1	1	2
644	644	649	South China-Vietnam subtropical evergreen forests	1	Tropical & Subtropical Moist Broadleaf Forests	Indomalayan	IN01	4	268	104.872	19.6	Nature Imperiled	#70A800	#38A700	#EE1E23	CC-BY 4.0	0	237	0	237	Indigenous - resident	Certain	1	seperate out Hainan portion		1	1	2
644	644	649	South China-Vietnam subtropical evergreen forests	1	Tropical & Subtropical Moist Broadleaf Forests	Indomalayan	IN01	4	268	104.872	19.6	Nature Imperiled	#70A800	#38A700	#EE1E23	CC-BY 4.0	0	237	0	237	Indigenous - resident	Certain	1	seperate out Hainan portion		1	1	2
644	644	649	South China-Vietnam subtropical evergreen forests	1	Tropical & Subtropical Moist Broadleaf Forests	Indomalayan	IN01	4	268	104.872	19.6	Nature Imperiled	#70A800	#38A700	#EE1E23	CC-BY 4.0	0	237	0	237	Indigenous - resident	Certain	1	seperate out Hainan portion		1	1	2
644	644	649	South China-Vietnam subtropical evergreen forests	1	Tropical & Subtropical Moist Broadleaf Forests	Indomalayan	IN01	4	268	104.872	19.6	Nature Imperiled	#70A800	#38A700	#EE1E23	CC-BY 4.0	0	237	0	237	Indigenous - resident	Certain	1	seperate out Hainan portion		1	0	2
644	644	649	South China-Vietnam subtropical evergreen forests	1	Tropical & Subtropical Moist Broadleaf Forests	Indomalayan	IN01	4	268	104.872	19.6	Nature Imperiled	#70A800	#38A700	#EE1E23	CC-BY 4.0	0	237	0	237	Indigenous - resident	Certain	1	seperate out Hainan portion		1	1	2
644	644	649	South China-Vietnam subtropical evergreen forests	1	Tropical & Subtropical Moist Broadleaf Forests	Indomalayan	IN01	4	268	104.872	19.6	Nature Imperiled	#70A800	#38A700	#EE1E23	CC-BY 4.0	0	237	0	237	Indigenous - resident	Certain	1	seperate out Hainan portion		1	1	2
644	644	649	South China-Vietnam subtropical evergreen forests	1	Tropical & Subtropical Moist Broadleaf Forests	Indomalayan	IN01	4	268	104.872	19.6	Nature Imperiled	#70A800	#38A700	#EE1E23	CC-BY 4.0	0	237	0	237	Indigenous - resident	Certain	1	seperate out Hainan portion		1	0	3
644	644	649	South China-Vietnam subtropical evergreen forests	1	Tropical & Subtropical Moist Broadleaf Forests	Indomalayan	IN01	4	268	104.872	19.6	Nature Imperiled	#70A800	#38A700	#EE1E23	CC-BY 4.0	0	237	0	237	Indigenous - resident	Certain	1	seperate out Hainan portion		1	0	3
644	644	649	South China-Vietnam subtropical evergreen forests	1	Tropical & Subtropical Moist Broadleaf Forests	Indomalayan	IN01	4	268	104.872	19.6	Nature Imperiled	#70A800	#38A700	#EE1E23	CC-BY 4.0	0	237	0	237	Indigenous - resident	Certain	1	seperate out Hainan portion		1	1	2
200	200	202	Deccan thorn scrub forests	13	Deserts & Xeric Shrublands	Indomalayan	IN13	4	315	55.5938	28.6473	Nature Imperiled	#C9A63E	#CC6767	#EE1E23	CC-BY 4.0	0	13	41	54	Indigenous - resident	Certain	0	Need to remove Sri Lankan portion		1	0	1
677	677	682	Southern Korea evergreen forests	4	Temperate Broadleaf & Mixed Forests	Palearctic	PA04	4	681	23.4862	1.44966	Nature Imperiled	#C8FABF	#00734C	#EE1E23	CC-BY 4.0	0	1	0	1	Indigenous - resident	Certain	1	Mainland portions only		1	1	3
703	703	709	Sumatran lowland rain forests	1	Tropical & Subtropical Moist Broadleaf Forests	Indomalayan	IN01	2	278	135.93	21.0129	Nature Could Reach Half Protected	#5AA500	#38A700	#7BC141	CC-BY 4.0	0	47	52	99	Indigenous - resident	Certain	1	Split out small islands		1	0	2
703	703	709	Sumatran lowland rain forests	1	Tropical & Subtropical Moist Broadleaf Forests	Indomalayan	IN01	2	278	135.93	21.0129	Nature Could Reach Half Protected	#5AA500	#38A700	#7BC141	CC-BY 4.0	0	47	52	99	Indigenous - resident	Certain	1	Split out small islands		1	0	2
703	703	709	Sumatran lowland rain forests	1	Tropical & Subtropical Moist Broadleaf Forests	Indomalayan	IN01	2	278	135.93	21.0129	Nature Could Reach Half Protected	#5AA500	#38A700	#7BC141	CC-BY 4.0	0	47	52	99	Indigenous - resident	Certain	1	Split out small islands		1	0	2
703	703	709	Sumatran lowland rain forests	1	Tropical & Subtropical Moist Broadleaf Forests	Indomalayan	IN01	2	278	135.93	21.0129	Nature Could Reach Half Protected	#5AA500	#38A700	#7BC141	CC-BY 4.0	0	47	52	99	Indigenous - resident	Certain	1	Split out small islands		1	0	2
703	703	709	Sumatran lowland rain forests	1	Tropical & Subtropical Moist Broadleaf Forests	Indomalayan	IN01	2	278	135.93	21.0129	Nature Could Reach Half Protected	#5AA500	#38A700	#7BC141	CC-BY 4.0	0	47	52	99	Indigenous - resident	Certain	1	Split out small islands		1	0	2
703	703	709	Sumatran lowland rain forests	1	Tropical & Subtropical Moist Broadleaf Forests	Indomalayan	IN01	2	278	135.93	21.0129	Nature Could Reach Half Protected	#5AA500	#38A700	#7BC141	CC-BY 4.0	0	47	52	99	Indigenous - resident	Certain	1	Split out small islands		1	0	2
703	703	709	Sumatran lowland rain forests	1	Tropical & Subtropical Moist Broadleaf Forests	Indomalayan	IN01	2	278	135.93	21.0129	Nature Could Reach Half Protected	#5AA500	#38A700	#7BC141	CC-BY 4.0	0	47	52	99	Indigenous - resident	Certain	1	Split out small islands		1	0	2
703	703	709	Sumatran lowland rain forests	1	Tropical & Subtropical Moist Broadleaf Forests	Indomalayan	IN01	2	278	135.93	21.0129	Nature Could Reach Half Protected	#5AA500	#38A700	#7BC141	CC-BY 4.0	0	47	52	99	Indigenous - resident	Certain	1	Split out small islands		1	0	2
703	703	709	Sumatran lowland rain forests	1	Tropical & Subtropical Moist Broadleaf Forests	Indomalayan	IN01	2	278	135.93	21.0129	Nature Could Reach Half Protected	#5AA500	#38A700	#7BC141	CC-BY 4.0	0	47	52	99	Indigenous - resident	Certain	1	Split out small islands		1	0	2
806	806	812	Zagros Mountains forest steppe	4	Temperate Broadleaf & Mixed Forests	Palearctic	PA04	4	688	67.5478	38.4667	Nature Imperiled	#53AD27	#00734C	#EE1E23	CC-BY 4.0	0	7	0	7	Indigenous - resident	Certain	1	Divide at latitude of Shahar River	Possible competition with lions to the south	1	1	4
311	311	315	Himalayan subtropical pine forests	3	Tropical & Subtropical Coniferous Forests	Indomalayan	IN03	3	302	142.222	7.17297	Nature Could Recover	#11A655	#88CE66	#F9A91B	CC-BY 4.0	0	8	172	180	Indigenous - resident	Certain	0			1	0	1
311	311	315	Himalayan subtropical pine forests	3	Tropical & Subtropical Coniferous Forests	Indomalayan	IN03	3	302	142.222	7.17297	Nature Could Recover	#11A655	#88CE66	#F9A91B	CC-BY 4.0	0	8	172	180	Indigenous - resident	Certain	0			1	0	1
311	311	315	Himalayan subtropical pine forests	3	Tropical & Subtropical Coniferous Forests	Indomalayan	IN03	3	302	142.222	7.17297	Nature Could Recover	#11A655	#88CE66	#F9A91B	CC-BY 4.0	0	8	172	180	Indigenous - resident	Certain	0			1	0	1
311	311	315	Himalayan subtropical pine forests	3	Tropical & Subtropical Coniferous Forests	Indomalayan	IN03	3	302	142.222	7.17297	Nature Could Recover	#11A655	#88CE66	#F9A91B	CC-BY 4.0	0	8	172	180	Indigenous - resident	Certain	0			1	0	1
311	311	315	Himalayan subtropical pine forests	3	Tropical & Subtropical Coniferous Forests	Indomalayan	IN03	3	302	142.222	7.17297	Nature Could Recover	#11A655	#88CE66	#F9A91B	CC-BY 4.0	0	8	172	180	Indigenous - resident	Certain	0			1	0	1
311	311	315	Himalayan subtropical pine forests	3	Tropical & Subtropical Coniferous Forests	Indomalayan	IN03	3	302	142.222	7.17297	Nature Could Recover	#11A655	#88CE66	#F9A91B	CC-BY 4.0	0	8	172	180	Indigenous - resident	Certain	0			1	0	1
311	311	315	Himalayan subtropical pine forests	3	Tropical & Subtropical Coniferous Forests	Indomalayan	IN03	3	302	142.222	7.17297	Nature Could Recover	#11A655	#88CE66	#F9A91B	CC-BY 4.0	0	8	172	180	Indigenous - resident	Certain	0			1	0	3
311	311	315	Himalayan subtropical pine forests	3	Tropical & Subtropical Coniferous Forests	Indomalayan	IN03	3	302	142.222	7.17297	Nature Could Recover	#11A655	#88CE66	#F9A91B	CC-BY 4.0	0	8	172	180	Indigenous - resident	Certain	0			1	0	1
311	311	315	Himalayan subtropical pine forests	3	Tropical & Subtropical Coniferous Forests	Indomalayan	IN03	3	302	142.222	7.17297	Nature Could Recover	#11A655	#88CE66	#F9A91B	CC-BY 4.0	0	8	172	180	Indigenous - resident	Certain	0			1	0	1
311	311	315	Himalayan subtropical pine forests	3	Tropical & Subtropical Coniferous Forests	Indomalayan	IN03	3	302	142.222	7.17297	Nature Could Recover	#11A655	#88CE66	#F9A91B	CC-BY 4.0	0	8	172	180	Indigenous - resident	Certain	0			1	0	1
311	311	315	Himalayan subtropical pine forests	3	Tropical & Subtropical Coniferous Forests	Indomalayan	IN03	3	302	142.222	7.17297	Nature Could Recover	#11A655	#88CE66	#F9A91B	CC-BY 4.0	0	8	172	180	Indigenous - resident	Certain	0			1	0	1
311	311	315	Himalayan subtropical pine forests	3	Tropical & Subtropical Coniferous Forests	Indomalayan	IN03	3	302	142.222	7.17297	Nature Could Recover	#11A655	#88CE66	#F9A91B	CC-BY 4.0	0	8	172	180	Indigenous - resident	Certain	0			1	0	1
311	311	315	Himalayan subtropical pine forests	3	Tropical & Subtropical Coniferous Forests	Indomalayan	IN03	3	302	142.222	7.17297	Nature Could Recover	#11A655	#88CE66	#F9A91B	CC-BY 4.0	0	8	172	180	Indigenous - resident	Certain	0			1	0	1
311	311	315	Himalayan subtropical pine forests	3	Tropical & Subtropical Coniferous Forests	Indomalayan	IN03	3	302	142.222	7.17297	Nature Could Recover	#11A655	#88CE66	#F9A91B	CC-BY 4.0	0	8	172	180	Indigenous - resident	Certain	0			1	0	1
311	311	315	Himalayan subtropical pine forests	3	Tropical & Subtropical Coniferous Forests	Indomalayan	IN03	3	302	142.222	7.17297	Nature Could Recover	#11A655	#88CE66	#F9A91B	CC-BY 4.0	0	8	172	180	Indigenous - resident	Certain	0			1	0	1
311	311	315	Himalayan subtropical pine forests	3	Tropical & Subtropical Coniferous Forests	Indomalayan	IN03	3	302	142.222	7.17297	Nature Could Recover	#11A655	#88CE66	#F9A91B	CC-BY 4.0	0	8	172	180	Indigenous - resident	Certain	0			1	0	1
311	311	315	Himalayan subtropical pine forests	3	Tropical & Subtropical Coniferous Forests	Indomalayan	IN03	3	302	142.222	7.17297	Nature Could Recover	#11A655	#88CE66	#F9A91B	CC-BY 4.0	0	8	172	180	Indigenous - resident	Certain	0			1	0	1
311	311	315	Himalayan subtropical pine forests	3	Tropical & Subtropical Coniferous Forests	Indomalayan	IN03	3	302	142.222	7.17297	Nature Could Recover	#11A655	#88CE66	#F9A91B	CC-BY 4.0	0	8	172	180	Indigenous - resident	Certain	0			1	0	1
311	311	315	Himalayan subtropical pine forests	3	Tropical & Subtropical Coniferous Forests	Indomalayan	IN03	3	302	142.222	7.17297	Nature Could Recover	#11A655	#88CE66	#F9A91B	CC-BY 4.0	0	8	172	180	Indigenous - resident	Certain	0			1	0	1
311	311	315	Himalayan subtropical pine forests	3	Tropical & Subtropical Coniferous Forests	Indomalayan	IN03	3	302	142.222	7.17297	Nature Could Recover	#11A655	#88CE66	#F9A91B	CC-BY 4.0	0	8	172	180	Indigenous - resident	Certain	0			1	0	1
311	311	315	Himalayan subtropical pine forests	3	Tropical & Subtropical Coniferous Forests	Indomalayan	IN03	3	302	142.222	7.17297	Nature Could Recover	#11A655	#88CE66	#F9A91B	CC-BY 4.0	0	8	172	180	Indigenous - resident	Certain	0			1	0	1
370	370	374	Khathiar-Gir dry deciduous forests	2	Tropical & Subtropical Dry Broadleaf Forests	Indomalayan	IN02	4	295	30.9184	23.7342	Nature Imperiled	#85D60B	#CCCD65	#EE1E23	CC-BY 4.0	0	14	68	82	Indigenous - resident	Certain	0			1	0	1
370	370	374	Khathiar-Gir dry deciduous forests	2	Tropical & Subtropical Dry Broadleaf Forests	Indomalayan	IN02	4	295	30.9184	23.7342	Nature Imperiled	#85D60B	#CCCD65	#EE1E23	CC-BY 4.0	0	14	68	82	Indigenous - resident	Certain	0			1	1	1
560	560	565	Peninsular Malaysian rain forests	1	Tropical & Subtropical Moist Broadleaf Forests	Indomalayan	IN01	2	265	74.5839	10.1776	Nature Could Reach Half Protected	#70A800	#38A700	#7BC141	CC-BY 4.0	0	47	5	52	Indigenous - resident	Certain	0			1	0	2
560	560	565	Peninsular Malaysian rain forests	1	Tropical & Subtropical Moist Broadleaf Forests	Indomalayan	IN01	2	265	74.5839	10.1776	Nature Could Reach Half Protected	#70A800	#38A700	#7BC141	CC-BY 4.0	0	47	5	52	Indigenous - resident	Certain	0			1	0	2
560	560	565	Peninsular Malaysian rain forests	1	Tropical & Subtropical Moist Broadleaf Forests	Indomalayan	IN01	2	265	74.5839	10.1776	Nature Could Reach Half Protected	#70A800	#38A700	#7BC141	CC-BY 4.0	0	47	5	52	Indigenous - resident	Certain	0			1	0	2
560	560	565	Peninsular Malaysian rain forests	1	Tropical & Subtropical Moist Broadleaf Forests	Indomalayan	IN01	2	265	74.5839	10.1776	Nature Could Reach Half Protected	#70A800	#38A700	#7BC141	CC-BY 4.0	0	47	5	52	Indigenous - resident	Certain	0			1	0	2
560	560	565	Peninsular Malaysian rain forests	1	Tropical & Subtropical Moist Broadleaf Forests	Indomalayan	IN01	2	265	74.5839	10.1776	Nature Could Reach Half Protected	#70A800	#38A700	#7BC141	CC-BY 4.0	0	47	5	52	Indigenous - resident	Certain	0			1	0	2
560	560	565	Peninsular Malaysian rain forests	1	Tropical & Subtropical Moist Broadleaf Forests	Indomalayan	IN01	2	265	74.5839	10.1776	Nature Could Reach Half Protected	#70A800	#38A700	#7BC141	CC-BY 4.0	0	47	5	52	Indigenous - resident	Certain	0			1	0	2
560	560	565	Peninsular Malaysian rain forests	1	Tropical & Subtropical Moist Broadleaf Forests	Indomalayan	IN01	2	265	74.5839	10.1776	Nature Could Reach Half Protected	#70A800	#38A700	#7BC141	CC-BY 4.0	0	47	5	52	Indigenous - resident	Certain	0			1	0	2
560	560	565	Peninsular Malaysian rain forests	1	Tropical & Subtropical Moist Broadleaf Forests	Indomalayan	IN01	2	265	74.5839	10.1776	Nature Could Reach Half Protected	#70A800	#38A700	#7BC141	CC-BY 4.0	0	47	5	52	Indigenous - resident	Certain	0			1	0	2
560	560	565	Peninsular Malaysian rain forests	1	Tropical & Subtropical Moist Broadleaf Forests	Indomalayan	IN01	2	265	74.5839	10.1776	Nature Could Reach Half Protected	#70A800	#38A700	#7BC141	CC-BY 4.0	0	47	5	52	Indigenous - resident	Certain	0			1	0	2
560	560	565	Peninsular Malaysian rain forests	1	Tropical & Subtropical Moist Broadleaf Forests	Indomalayan	IN01	2	265	74.5839	10.1776	Nature Could Reach Half Protected	#70A800	#38A700	#7BC141	CC-BY 4.0	0	47	5	52	Indigenous - resident	Certain	0			1	0	2
560	560	565	Peninsular Malaysian rain forests	1	Tropical & Subtropical Moist Broadleaf Forests	Indomalayan	IN01	2	265	74.5839	10.1776	Nature Could Reach Half Protected	#70A800	#38A700	#7BC141	CC-BY 4.0	0	47	5	52	Indigenous - resident	Certain	0			1	0	2
560	560	565	Peninsular Malaysian rain forests	1	Tropical & Subtropical Moist Broadleaf Forests	Indomalayan	IN01	2	265	74.5839	10.1776	Nature Could Reach Half Protected	#70A800	#38A700	#7BC141	CC-BY 4.0	0	47	5	52	Indigenous - resident	Certain	0			1	0	2
508	508	513	Northern Indochina subtropical forests	1	Tropical & Subtropical Moist Broadleaf Forests	Indomalayan	IN01	3	256	56.1993	38.1808	Nature Could Recover	#98E500	#38A700	#F9A91B	CC-BY 4.0	0	48	22	70	Indigenous - resident	Certain	0	Divide along Myanmar border for extirpated		1	0	2
156	156	158	Chao Phraya lowland moist deciduous forests	1	Tropical & Subtropical Moist Broadleaf Forests	Indomalayan	IN01	4	225	21.9306	1.69779	Nature Imperiled	#5AA502	#38A700	#EE1E23	CC-BY 4.0	0	0	0	0	Indigenous - resident	Certain	1	Divide for purposes of extirpation mask	No tiger observations	1	1	3
156	156	158	Chao Phraya lowland moist deciduous forests	1	Tropical & Subtropical Moist Broadleaf Forests	Indomalayan	IN01	4	225	21.9306	1.69779	Nature Imperiled	#5AA502	#38A700	#EE1E23	CC-BY 4.0	0	0	0	0	Indigenous - resident	Certain	1	Divide for purposes of extirpation mask	No tiger observations	1	1	2
156	156	158	Chao Phraya lowland moist deciduous forests	1	Tropical & Subtropical Moist Broadleaf Forests	Indomalayan	IN01	4	225	21.9306	1.69779	Nature Imperiled	#5AA502	#38A700	#EE1E23	CC-BY 4.0	0	0	0	0	Indigenous - resident	Certain	1	Divide for purposes of extirpation mask	No tiger observations	1	0	2
156	156	158	Chao Phraya lowland moist deciduous forests	1	Tropical & Subtropical Moist Broadleaf Forests	Indomalayan	IN01	4	225	21.9306	1.69779	Nature Imperiled	#5AA502	#38A700	#EE1E23	CC-BY 4.0	0	0	0	0	Indigenous - resident	Certain	1	Divide for purposes of extirpation mask	No tiger observations	1	0	2
454	454	459	Myanmar coastal rain forests	1	Tropical & Subtropical Moist Broadleaf Forests	Indomalayan	IN01	3	250	65.4412	5.64413	Nature Could Recover	#47B700	#38A700	#F9A91B	CC-BY 4.0	0	4	0	4	Indigenous - resident	Certain	1			1	0	2
454	454	459	Myanmar coastal rain forests	1	Tropical & Subtropical Moist Broadleaf Forests	Indomalayan	IN01	3	250	65.4412	5.64413	Nature Could Recover	#47B700	#38A700	#F9A91B	CC-BY 4.0	0	4	0	4	Indigenous - resident	Certain	1			1	0	2
454	454	459	Myanmar coastal rain forests	1	Tropical & Subtropical Moist Broadleaf Forests	Indomalayan	IN01	3	250	65.4412	5.64413	Nature Could Recover	#47B700	#38A700	#F9A91B	CC-BY 4.0	0	4	0	4	Indigenous - resident	Certain	1			1	0	2
454	454	459	Myanmar coastal rain forests	1	Tropical & Subtropical Moist Broadleaf Forests	Indomalayan	IN01	3	250	65.4412	5.64413	Nature Could Recover	#47B700	#38A700	#F9A91B	CC-BY 4.0	0	4	0	4	Indigenous - resident	Certain	1			1	0	2
454	454	459	Myanmar coastal rain forests	1	Tropical & Subtropical Moist Broadleaf Forests	Indomalayan	IN01	3	250	65.4412	5.64413	Nature Could Recover	#47B700	#38A700	#F9A91B	CC-BY 4.0	0	4	0	4	Indigenous - resident	Certain	1			1	0	2
454	454	459	Myanmar coastal rain forests	1	Tropical & Subtropical Moist Broadleaf Forests	Indomalayan	IN01	3	250	65.4412	5.64413	Nature Could Recover	#47B700	#38A700	#F9A91B	CC-BY 4.0	0	4	0	4	Indigenous - resident	Certain	1			1	0	1
454	454	459	Myanmar coastal rain forests	1	Tropical & Subtropical Moist Broadleaf Forests	Indomalayan	IN01	3	250	65.4412	5.64413	Nature Could Recover	#47B700	#38A700	#F9A91B	CC-BY 4.0	0	4	0	4	Indigenous - resident	Certain	1			1	0	1
454	454	459	Myanmar coastal rain forests	1	Tropical & Subtropical Moist Broadleaf Forests	Indomalayan	IN01	3	250	65.4412	5.64413	Nature Could Recover	#47B700	#38A700	#F9A91B	CC-BY 4.0	0	4	0	4	Indigenous - resident	Certain	1			1	0	1
454	454	459	Myanmar coastal rain forests	1	Tropical & Subtropical Moist Broadleaf Forests	Indomalayan	IN01	3	250	65.4412	5.64413	Nature Could Recover	#47B700	#38A700	#F9A91B	CC-BY 4.0	0	4	0	4	Indigenous - resident	Certain	1			1	0	1
454	454	459	Myanmar coastal rain forests	1	Tropical & Subtropical Moist Broadleaf Forests	Indomalayan	IN01	3	250	65.4412	5.64413	Nature Could Recover	#47B700	#38A700	#F9A91B	CC-BY 4.0	0	4	0	4	Indigenous - resident	Certain	1			1	0	1
454	454	459	Myanmar coastal rain forests	1	Tropical & Subtropical Moist Broadleaf Forests	Indomalayan	IN01	3	250	65.4412	5.64413	Nature Could Recover	#47B700	#38A700	#F9A91B	CC-BY 4.0	0	4	0	4	Indigenous - resident	Certain	1			1	0	1
454	454	459	Myanmar coastal rain forests	1	Tropical & Subtropical Moist Broadleaf Forests	Indomalayan	IN01	3	250	65.4412	5.64413	Nature Could Recover	#47B700	#38A700	#F9A91B	CC-BY 4.0	0	4	0	4	Indigenous - resident	Certain	1			1	0	1
454	454	459	Myanmar coastal rain forests	1	Tropical & Subtropical Moist Broadleaf Forests	Indomalayan	IN01	3	250	65.4412	5.64413	Nature Could Recover	#47B700	#38A700	#F9A91B	CC-BY 4.0	0	4	0	4	Indigenous - resident	Certain	1			1	0	1
454	454	459	Myanmar coastal rain forests	1	Tropical & Subtropical Moist Broadleaf Forests	Indomalayan	IN01	3	250	65.4412	5.64413	Nature Could Recover	#47B700	#38A700	#F9A91B	CC-BY 4.0	0	4	0	4	Indigenous - resident	Certain	1			1	0	3
454	454	459	Myanmar coastal rain forests	1	Tropical & Subtropical Moist Broadleaf Forests	Indomalayan	IN01	3	250	65.4412	5.64413	Nature Could Recover	#47B700	#38A700	#F9A91B	CC-BY 4.0	0	4	0	4	Indigenous - resident	Certain	1			1	0	3
454	454	459	Myanmar coastal rain forests	1	Tropical & Subtropical Moist Broadleaf Forests	Indomalayan	IN01	3	250	65.4412	5.64413	Nature Could Recover	#47B700	#38A700	#F9A91B	CC-BY 4.0	0	4	0	4	Indigenous - resident	Certain	1			1	0	1
727	727	733	Tenasserim-South Thailand semi-evergreen rain forests	1	Tropical & Subtropical Moist Broadleaf Forests	Indomalayan	IN01	2	284	49.0541	8.00932	Nature Could Reach Half Protected	#267A0A	#38A700	#7BC141	CC-BY 4.0	0	7	25	32	Indigenous - resident	Certain	0			1	0	2
727	727	733	Tenasserim-South Thailand semi-evergreen rain forests	1	Tropical & Subtropical Moist Broadleaf Forests	Indomalayan	IN01	2	284	49.0541	8.00932	Nature Could Reach Half Protected	#267A0A	#38A700	#7BC141	CC-BY 4.0	0	7	25	32	Indigenous - resident	Certain	0			1	0	2
727	727	733	Tenasserim-South Thailand semi-evergreen rain forests	1	Tropical & Subtropical Moist Broadleaf Forests	Indomalayan	IN01	2	284	49.0541	8.00932	Nature Could Reach Half Protected	#267A0A	#38A700	#7BC141	CC-BY 4.0	0	7	25	32	Indigenous - resident	Certain	0			1	0	2
727	727	733	Tenasserim-South Thailand semi-evergreen rain forests	1	Tropical & Subtropical Moist Broadleaf Forests	Indomalayan	IN01	2	284	49.0541	8.00932	Nature Could Reach Half Protected	#267A0A	#38A700	#7BC141	CC-BY 4.0	0	7	25	32	Indigenous - resident	Certain	0			1	0	2
727	727	733	Tenasserim-South Thailand semi-evergreen rain forests	1	Tropical & Subtropical Moist Broadleaf Forests	Indomalayan	IN01	2	284	49.0541	8.00932	Nature Could Reach Half Protected	#267A0A	#38A700	#7BC141	CC-BY 4.0	0	7	25	32	Indigenous - resident	Certain	0			1	0	2
727	727	733	Tenasserim-South Thailand semi-evergreen rain forests	1	Tropical & Subtropical Moist Broadleaf Forests	Indomalayan	IN01	2	284	49.0541	8.00932	Nature Could Reach Half Protected	#267A0A	#38A700	#7BC141	CC-BY 4.0	0	7	25	32	Indigenous - resident	Certain	0			1	0	2
727	727	733	Tenasserim-South Thailand semi-evergreen rain forests	1	Tropical & Subtropical Moist Broadleaf Forests	Indomalayan	IN01	2	284	49.0541	8.00932	Nature Could Reach Half Protected	#267A0A	#38A700	#7BC141	CC-BY 4.0	0	7	25	32	Indigenous - resident	Certain	0			1	0	2
727	727	733	Tenasserim-South Thailand semi-evergreen rain forests	1	Tropical & Subtropical Moist Broadleaf Forests	Indomalayan	IN01	2	284	49.0541	8.00932	Nature Could Reach Half Protected	#267A0A	#38A700	#7BC141	CC-BY 4.0	0	7	25	32	Indigenous - resident	Certain	0			1	0	2
727	727	733	Tenasserim-South Thailand semi-evergreen rain forests	1	Tropical & Subtropical Moist Broadleaf Forests	Indomalayan	IN01	2	284	49.0541	8.00932	Nature Could Reach Half Protected	#267A0A	#38A700	#7BC141	CC-BY 4.0	0	7	25	32	Indigenous - resident	Certain	0			1	0	2
727	727	733	Tenasserim-South Thailand semi-evergreen rain forests	1	Tropical & Subtropical Moist Broadleaf Forests	Indomalayan	IN01	2	284	49.0541	8.00932	Nature Could Reach Half Protected	#267A0A	#38A700	#7BC141	CC-BY 4.0	0	7	25	32	Indigenous - resident	Certain	0			1	0	2
727	727	733	Tenasserim-South Thailand semi-evergreen rain forests	1	Tropical & Subtropical Moist Broadleaf Forests	Indomalayan	IN01	2	284	49.0541	8.00932	Nature Could Reach Half Protected	#267A0A	#38A700	#7BC141	CC-BY 4.0	0	7	25	32	Indigenous - resident	Certain	0			1	0	2
727	727	733	Tenasserim-South Thailand semi-evergreen rain forests	1	Tropical & Subtropical Moist Broadleaf Forests	Indomalayan	IN01	2	284	49.0541	8.00932	Nature Could Reach Half Protected	#267A0A	#38A700	#7BC141	CC-BY 4.0	0	7	25	32	Indigenous - resident	Certain	0			1	0	2
727	727	733	Tenasserim-South Thailand semi-evergreen rain forests	1	Tropical & Subtropical Moist Broadleaf Forests	Indomalayan	IN01	2	284	49.0541	8.00932	Nature Could Reach Half Protected	#267A0A	#38A700	#7BC141	CC-BY 4.0	0	7	25	32	Indigenous - resident	Certain	0			1	0	2
727	727	733	Tenasserim-South Thailand semi-evergreen rain forests	1	Tropical & Subtropical Moist Broadleaf Forests	Indomalayan	IN01	2	284	49.0541	8.00932	Nature Could Reach Half Protected	#267A0A	#38A700	#7BC141	CC-BY 4.0	0	7	25	32	Indigenous - resident	Certain	0			1	0	2
727	727	733	Tenasserim-South Thailand semi-evergreen rain forests	1	Tropical & Subtropical Moist Broadleaf Forests	Indomalayan	IN01	2	284	49.0541	8.00932	Nature Could Reach Half Protected	#267A0A	#38A700	#7BC141	CC-BY 4.0	0	7	25	32	Indigenous - resident	Certain	0			1	0	2
727	727	733	Tenasserim-South Thailand semi-evergreen rain forests	1	Tropical & Subtropical Moist Broadleaf Forests	Indomalayan	IN01	2	284	49.0541	8.00932	Nature Could Reach Half Protected	#267A0A	#38A700	#7BC141	CC-BY 4.0	0	7	25	32	Indigenous - resident	Certain	0			1	0	2
453	453	458	Myanmar Coast mangroves	14	Mangroves	Indomalayan	IN14	2	321	63.7493	1.78948	Nature Could Reach Half Protected	#E600AA	#FE01C4	#7BC141	CC-BY 4.0	0	1	0	1	Indigenous - resident	Certain	1		Mangroves adjacent to upland areas	1	0	2
453	453	458	Myanmar Coast mangroves	14	Mangroves	Indomalayan	IN14	2	321	63.7493	1.78948	Nature Could Reach Half Protected	#E600AA	#FE01C4	#7BC141	CC-BY 4.0	0	1	0	1	Indigenous - resident	Certain	1		Mangroves adjacent to upland areas	1	0	2
453	453	458	Myanmar Coast mangroves	14	Mangroves	Indomalayan	IN14	2	321	63.7493	1.78948	Nature Could Reach Half Protected	#E600AA	#FE01C4	#7BC141	CC-BY 4.0	0	1	0	1	Indigenous - resident	Certain	1		Mangroves adjacent to upland areas	1	0	2
453	453	458	Myanmar Coast mangroves	14	Mangroves	Indomalayan	IN14	2	321	63.7493	1.78948	Nature Could Reach Half Protected	#E600AA	#FE01C4	#7BC141	CC-BY 4.0	0	1	0	1	Indigenous - resident	Certain	1		Mangroves adjacent to upland areas	1	0	2
453	453	458	Myanmar Coast mangroves	14	Mangroves	Indomalayan	IN14	2	321	63.7493	1.78948	Nature Could Reach Half Protected	#E600AA	#FE01C4	#7BC141	CC-BY 4.0	0	1	0	1	Indigenous - resident	Certain	1		Mangroves adjacent to upland areas	1	0	2
453	453	458	Myanmar Coast mangroves	14	Mangroves	Indomalayan	IN14	2	321	63.7493	1.78948	Nature Could Reach Half Protected	#E600AA	#FE01C4	#7BC141	CC-BY 4.0	0	1	0	1	Indigenous - resident	Certain	1		Mangroves adjacent to upland areas	1	0	2
453	453	458	Myanmar Coast mangroves	14	Mangroves	Indomalayan	IN14	2	321	63.7493	1.78948	Nature Could Reach Half Protected	#E600AA	#FE01C4	#7BC141	CC-BY 4.0	0	1	0	1	Indigenous - resident	Certain	1		Mangroves adjacent to upland areas	1	0	2
453	453	458	Myanmar Coast mangroves	14	Mangroves	Indomalayan	IN14	2	321	63.7493	1.78948	Nature Could Reach Half Protected	#E600AA	#FE01C4	#7BC141	CC-BY 4.0	0	1	0	1	Indigenous - resident	Certain	1		Mangroves adjacent to upland areas	1	0	2
453	453	458	Myanmar Coast mangroves	14	Mangroves	Indomalayan	IN14	2	321	63.7493	1.78948	Nature Could Reach Half Protected	#E600AA	#FE01C4	#7BC141	CC-BY 4.0	0	1	0	1	Indigenous - resident	Certain	1		Mangroves adjacent to upland areas	1	0	2
453	453	458	Myanmar Coast mangroves	14	Mangroves	Indomalayan	IN14	2	321	63.7493	1.78948	Nature Could Reach Half Protected	#E600AA	#FE01C4	#7BC141	CC-BY 4.0	0	1	0	1	Indigenous - resident	Certain	1		Mangroves adjacent to upland areas	1	0	2
453	453	458	Myanmar Coast mangroves	14	Mangroves	Indomalayan	IN14	2	321	63.7493	1.78948	Nature Could Reach Half Protected	#E600AA	#FE01C4	#7BC141	CC-BY 4.0	0	1	0	1	Indigenous - resident	Certain	1		Mangroves adjacent to upland areas	1	0	2
453	453	458	Myanmar Coast mangroves	14	Mangroves	Indomalayan	IN14	2	321	63.7493	1.78948	Nature Could Reach Half Protected	#E600AA	#FE01C4	#7BC141	CC-BY 4.0	0	1	0	1	Indigenous - resident	Certain	1		Mangroves adjacent to upland areas	1	0	2
453	453	458	Myanmar Coast mangroves	14	Mangroves	Indomalayan	IN14	2	321	63.7493	1.78948	Nature Could Reach Half Protected	#E600AA	#FE01C4	#7BC141	CC-BY 4.0	0	1	0	1	Indigenous - resident	Certain	1		Mangroves adjacent to upland areas	1	0	2
453	453	458	Myanmar Coast mangroves	14	Mangroves	Indomalayan	IN14	2	321	63.7493	1.78948	Nature Could Reach Half Protected	#E600AA	#FE01C4	#7BC141	CC-BY 4.0	0	1	0	1	Indigenous - resident	Certain	1		Mangroves adjacent to upland areas	1	0	2
453	453	458	Myanmar Coast mangroves	14	Mangroves	Indomalayan	IN14	2	321	63.7493	1.78948	Nature Could Reach Half Protected	#E600AA	#FE01C4	#7BC141	CC-BY 4.0	0	1	0	1	Indigenous - resident	Certain	1		Mangroves adjacent to upland areas	1	0	2
453	453	458	Myanmar Coast mangroves	14	Mangroves	Indomalayan	IN14	2	321	63.7493	1.78948	Nature Could Reach Half Protected	#E600AA	#FE01C4	#7BC141	CC-BY 4.0	0	1	0	1	Indigenous - resident	Certain	1		Mangroves adjacent to upland areas	1	0	2
453	453	458	Myanmar Coast mangroves	14	Mangroves	Indomalayan	IN14	2	321	63.7493	1.78948	Nature Could Reach Half Protected	#E600AA	#FE01C4	#7BC141	CC-BY 4.0	0	1	0	1	Indigenous - resident	Certain	1		Mangroves adjacent to upland areas	1	0	2
453	453	458	Myanmar Coast mangroves	14	Mangroves	Indomalayan	IN14	2	321	63.7493	1.78948	Nature Could Reach Half Protected	#E600AA	#FE01C4	#7BC141	CC-BY 4.0	0	1	0	1	Indigenous - resident	Certain	1		Mangroves adjacent to upland areas	1	0	2
453	453	458	Myanmar Coast mangroves	14	Mangroves	Indomalayan	IN14	2	321	63.7493	1.78948	Nature Could Reach Half Protected	#E600AA	#FE01C4	#7BC141	CC-BY 4.0	0	1	0	1	Indigenous - resident	Certain	1		Mangroves adjacent to upland areas	1	0	2
453	453	458	Myanmar Coast mangroves	14	Mangroves	Indomalayan	IN14	2	321	63.7493	1.78948	Nature Could Reach Half Protected	#E600AA	#FE01C4	#7BC141	CC-BY 4.0	0	1	0	1	Indigenous - resident	Certain	1		Mangroves adjacent to upland areas	1	0	2
453	453	458	Myanmar Coast mangroves	14	Mangroves	Indomalayan	IN14	2	321	63.7493	1.78948	Nature Could Reach Half Protected	#E600AA	#FE01C4	#7BC141	CC-BY 4.0	0	1	0	1	Indigenous - resident	Certain	1		Mangroves adjacent to upland areas	1	0	2
453	453	458	Myanmar Coast mangroves	14	Mangroves	Indomalayan	IN14	2	321	63.7493	1.78948	Nature Could Reach Half Protected	#E600AA	#FE01C4	#7BC141	CC-BY 4.0	0	1	0	1	Indigenous - resident	Certain	1		Mangroves adjacent to upland areas	1	0	2
453	453	458	Myanmar Coast mangroves	14	Mangroves	Indomalayan	IN14	2	321	63.7493	1.78948	Nature Could Reach Half Protected	#E600AA	#FE01C4	#7BC141	CC-BY 4.0	0	1	0	1	Indigenous - resident	Certain	1		Mangroves adjacent to upland areas	1	0	2
453	453	458	Myanmar Coast mangroves	14	Mangroves	Indomalayan	IN14	2	321	63.7493	1.78948	Nature Could Reach Half Protected	#E600AA	#FE01C4	#7BC141	CC-BY 4.0	0	1	0	1	Indigenous - resident	Certain	1		Mangroves adjacent to upland areas	1	0	2
453	453	458	Myanmar Coast mangroves	14	Mangroves	Indomalayan	IN14	2	321	63.7493	1.78948	Nature Could Reach Half Protected	#E600AA	#FE01C4	#7BC141	CC-BY 4.0	0	1	0	1	Indigenous - resident	Certain	1		Mangroves adjacent to upland areas	1	0	2
453	453	458	Myanmar Coast mangroves	14	Mangroves	Indomalayan	IN14	2	321	63.7493	1.78948	Nature Could Reach Half Protected	#E600AA	#FE01C4	#7BC141	CC-BY 4.0	0	1	0	1	Indigenous - resident	Certain	1		Mangroves adjacent to upland areas	1	0	2
453	453	458	Myanmar Coast mangroves	14	Mangroves	Indomalayan	IN14	2	321	63.7493	1.78948	Nature Could Reach Half Protected	#E600AA	#FE01C4	#7BC141	CC-BY 4.0	0	1	0	1	Indigenous - resident	Certain	1		Mangroves adjacent to upland areas	1	0	2
453	453	458	Myanmar Coast mangroves	14	Mangroves	Indomalayan	IN14	2	321	63.7493	1.78948	Nature Could Reach Half Protected	#E600AA	#FE01C4	#7BC141	CC-BY 4.0	0	1	0	1	Indigenous - resident	Certain	1		Mangroves adjacent to upland areas	1	0	2
453	453	458	Myanmar Coast mangroves	14	Mangroves	Indomalayan	IN14	2	321	63.7493	1.78948	Nature Could Reach Half Protected	#E600AA	#FE01C4	#7BC141	CC-BY 4.0	0	1	0	1	Indigenous - resident	Certain	1		Mangroves adjacent to upland areas	1	0	2
453	453	458	Myanmar Coast mangroves	14	Mangroves	Indomalayan	IN14	2	321	63.7493	1.78948	Nature Could Reach Half Protected	#E600AA	#FE01C4	#7BC141	CC-BY 4.0	0	1	0	1	Indigenous - resident	Certain	1		Mangroves adjacent to upland areas	1	0	2
453	453	458	Myanmar Coast mangroves	14	Mangroves	Indomalayan	IN14	2	321	63.7493	1.78948	Nature Could Reach Half Protected	#E600AA	#FE01C4	#7BC141	CC-BY 4.0	0	1	0	1	Indigenous - resident	Certain	1		Mangroves adjacent to upland areas	1	0	2
453	453	458	Myanmar Coast mangroves	14	Mangroves	Indomalayan	IN14	2	321	63.7493	1.78948	Nature Could Reach Half Protected	#E600AA	#FE01C4	#7BC141	CC-BY 4.0	0	1	0	1	Indigenous - resident	Certain	1		Mangroves adjacent to upland areas	1	0	2
453	453	458	Myanmar Coast mangroves	14	Mangroves	Indomalayan	IN14	2	321	63.7493	1.78948	Nature Could Reach Half Protected	#E600AA	#FE01C4	#7BC141	CC-BY 4.0	0	1	0	1	Indigenous - resident	Certain	1		Mangroves adjacent to upland areas	1	0	2
453	453	458	Myanmar Coast mangroves	14	Mangroves	Indomalayan	IN14	2	321	63.7493	1.78948	Nature Could Reach Half Protected	#E600AA	#FE01C4	#7BC141	CC-BY 4.0	0	1	0	1	Indigenous - resident	Certain	1		Mangroves adjacent to upland areas	1	0	2
453	453	458	Myanmar Coast mangroves	14	Mangroves	Indomalayan	IN14	2	321	63.7493	1.78948	Nature Could Reach Half Protected	#E600AA	#FE01C4	#7BC141	CC-BY 4.0	0	1	0	1	Indigenous - resident	Certain	1		Mangroves adjacent to upland areas	1	0	2
453	453	458	Myanmar Coast mangroves	14	Mangroves	Indomalayan	IN14	2	321	63.7493	1.78948	Nature Could Reach Half Protected	#E600AA	#FE01C4	#7BC141	CC-BY 4.0	0	1	0	1	Indigenous - resident	Certain	1		Mangroves adjacent to upland areas	1	0	2
453	453	458	Myanmar Coast mangroves	14	Mangroves	Indomalayan	IN14	2	321	63.7493	1.78948	Nature Could Reach Half Protected	#E600AA	#FE01C4	#7BC141	CC-BY 4.0	0	1	0	1	Indigenous - resident	Certain	1		Mangroves adjacent to upland areas	1	0	2
453	453	458	Myanmar Coast mangroves	14	Mangroves	Indomalayan	IN14	2	321	63.7493	1.78948	Nature Could Reach Half Protected	#E600AA	#FE01C4	#7BC141	CC-BY 4.0	0	1	0	1	Indigenous - resident	Certain	1		Mangroves adjacent to upland areas	1	0	2
453	453	458	Myanmar Coast mangroves	14	Mangroves	Indomalayan	IN14	2	321	63.7493	1.78948	Nature Could Reach Half Protected	#E600AA	#FE01C4	#7BC141	CC-BY 4.0	0	1	0	1	Indigenous - resident	Certain	1		Mangroves adjacent to upland areas	1	0	2
453	453	458	Myanmar Coast mangroves	14	Mangroves	Indomalayan	IN14	2	321	63.7493	1.78948	Nature Could Reach Half Protected	#E600AA	#FE01C4	#7BC141	CC-BY 4.0	0	1	0	1	Indigenous - resident	Certain	1		Mangroves adjacent to upland areas	1	0	2
453	453	458	Myanmar Coast mangroves	14	Mangroves	Indomalayan	IN14	2	321	63.7493	1.78948	Nature Could Reach Half Protected	#E600AA	#FE01C4	#7BC141	CC-BY 4.0	0	1	0	1	Indigenous - resident	Certain	1		Mangroves adjacent to upland areas	1	0	2
453	453	458	Myanmar Coast mangroves	14	Mangroves	Indomalayan	IN14	2	321	63.7493	1.78948	Nature Could Reach Half Protected	#E600AA	#FE01C4	#7BC141	CC-BY 4.0	0	1	0	1	Indigenous - resident	Certain	1		Mangroves adjacent to upland areas	1	0	3
453	453	458	Myanmar Coast mangroves	14	Mangroves	Indomalayan	IN14	2	321	63.7493	1.78948	Nature Could Reach Half Protected	#E600AA	#FE01C4	#7BC141	CC-BY 4.0	0	1	0	1	Indigenous - resident	Certain	1		Mangroves adjacent to upland areas	1	0	3
453	453	458	Myanmar Coast mangroves	14	Mangroves	Indomalayan	IN14	2	321	63.7493	1.78948	Nature Could Reach Half Protected	#E600AA	#FE01C4	#7BC141	CC-BY 4.0	0	1	0	1	Indigenous - resident	Certain	1		Mangroves adjacent to upland areas	1	0	1
453	453	458	Myanmar Coast mangroves	14	Mangroves	Indomalayan	IN14	2	321	63.7493	1.78948	Nature Could Reach Half Protected	#E600AA	#FE01C4	#7BC141	CC-BY 4.0	0	1	0	1	Indigenous - resident	Certain	1		Mangroves adjacent to upland areas	1	0	1
453	453	458	Myanmar Coast mangroves	14	Mangroves	Indomalayan	IN14	2	321	63.7493	1.78948	Nature Could Reach Half Protected	#E600AA	#FE01C4	#7BC141	CC-BY 4.0	0	1	0	1	Indigenous - resident	Certain	1		Mangroves adjacent to upland areas	1	0	1
453	453	458	Myanmar Coast mangroves	14	Mangroves	Indomalayan	IN14	2	321	63.7493	1.78948	Nature Could Reach Half Protected	#E600AA	#FE01C4	#7BC141	CC-BY 4.0	0	1	0	1	Indigenous - resident	Certain	1		Mangroves adjacent to upland areas	1	0	1
453	453	458	Myanmar Coast mangroves	14	Mangroves	Indomalayan	IN14	2	321	63.7493	1.78948	Nature Could Reach Half Protected	#E600AA	#FE01C4	#7BC141	CC-BY 4.0	0	1	0	1	Indigenous - resident	Certain	1		Mangroves adjacent to upland areas	1	0	1
453	453	458	Myanmar Coast mangroves	14	Mangroves	Indomalayan	IN14	2	321	63.7493	1.78948	Nature Could Reach Half Protected	#E600AA	#FE01C4	#7BC141	CC-BY 4.0	0	1	0	1	Indigenous - resident	Certain	1		Mangroves adjacent to upland areas	1	0	1
453	453	458	Myanmar Coast mangroves	14	Mangroves	Indomalayan	IN14	2	321	63.7493	1.78948	Nature Could Reach Half Protected	#E600AA	#FE01C4	#7BC141	CC-BY 4.0	0	1	0	1	Indigenous - resident	Certain	1		Mangroves adjacent to upland areas	1	0	1
453	453	458	Myanmar Coast mangroves	14	Mangroves	Indomalayan	IN14	2	321	63.7493	1.78948	Nature Could Reach Half Protected	#E600AA	#FE01C4	#7BC141	CC-BY 4.0	0	1	0	1	Indigenous - resident	Certain	1		Mangroves adjacent to upland areas	1	0	1
453	453	458	Myanmar Coast mangroves	14	Mangroves	Indomalayan	IN14	2	321	63.7493	1.78948	Nature Could Reach Half Protected	#E600AA	#FE01C4	#7BC141	CC-BY 4.0	0	1	0	1	Indigenous - resident	Certain	1		Mangroves adjacent to upland areas	1	0	1
453	453	458	Myanmar Coast mangroves	14	Mangroves	Indomalayan	IN14	2	321	63.7493	1.78948	Nature Could Reach Half Protected	#E600AA	#FE01C4	#7BC141	CC-BY 4.0	0	1	0	1	Indigenous - resident	Certain	1		Mangroves adjacent to upland areas	1	0	1
453	453	458	Myanmar Coast mangroves	14	Mangroves	Indomalayan	IN14	2	321	63.7493	1.78948	Nature Could Reach Half Protected	#E600AA	#FE01C4	#7BC141	CC-BY 4.0	0	1	0	1	Indigenous - resident	Certain	1		Mangroves adjacent to upland areas	1	0	1
453	453	458	Myanmar Coast mangroves	14	Mangroves	Indomalayan	IN14	2	321	63.7493	1.78948	Nature Could Reach Half Protected	#E600AA	#FE01C4	#7BC141	CC-BY 4.0	0	1	0	1	Indigenous - resident	Certain	1		Mangroves adjacent to upland areas	1	0	1
453	453	458	Myanmar Coast mangroves	14	Mangroves	Indomalayan	IN14	2	321	63.7493	1.78948	Nature Could Reach Half Protected	#E600AA	#FE01C4	#7BC141	CC-BY 4.0	0	1	0	1	Indigenous - resident	Certain	1		Mangroves adjacent to upland areas	1	0	1
453	453	458	Myanmar Coast mangroves	14	Mangroves	Indomalayan	IN14	2	321	63.7493	1.78948	Nature Could Reach Half Protected	#E600AA	#FE01C4	#7BC141	CC-BY 4.0	0	1	0	1	Indigenous - resident	Certain	1		Mangroves adjacent to upland areas	1	0	1
453	453	458	Myanmar Coast mangroves	14	Mangroves	Indomalayan	IN14	2	321	63.7493	1.78948	Nature Could Reach Half Protected	#E600AA	#FE01C4	#7BC141	CC-BY 4.0	0	1	0	1	Indigenous - resident	Certain	1		Mangroves adjacent to upland areas	1	0	1
453	453	458	Myanmar Coast mangroves	14	Mangroves	Indomalayan	IN14	2	321	63.7493	1.78948	Nature Could Reach Half Protected	#E600AA	#FE01C4	#7BC141	CC-BY 4.0	0	1	0	1	Indigenous - resident	Certain	1		Mangroves adjacent to upland areas	1	0	1
453	453	458	Myanmar Coast mangroves	14	Mangroves	Indomalayan	IN14	2	321	63.7493	1.78948	Nature Could Reach Half Protected	#E600AA	#FE01C4	#7BC141	CC-BY 4.0	0	1	0	1	Indigenous - resident	Certain	1		Mangroves adjacent to upland areas	1	0	1
453	453	458	Myanmar Coast mangroves	14	Mangroves	Indomalayan	IN14	2	321	63.7493	1.78948	Nature Could Reach Half Protected	#E600AA	#FE01C4	#7BC141	CC-BY 4.0	0	1	0	1	Indigenous - resident	Certain	1		Mangroves adjacent to upland areas	1	0	1
453	453	458	Myanmar Coast mangroves	14	Mangroves	Indomalayan	IN14	2	321	63.7493	1.78948	Nature Could Reach Half Protected	#E600AA	#FE01C4	#7BC141	CC-BY 4.0	0	1	0	1	Indigenous - resident	Certain	1		Mangroves adjacent to upland areas	1	0	1
453	453	458	Myanmar Coast mangroves	14	Mangroves	Indomalayan	IN14	2	321	63.7493	1.78948	Nature Could Reach Half Protected	#E600AA	#FE01C4	#7BC141	CC-BY 4.0	0	1	0	1	Indigenous - resident	Certain	1		Mangroves adjacent to upland areas	1	0	1
453	453	458	Myanmar Coast mangroves	14	Mangroves	Indomalayan	IN14	2	321	63.7493	1.78948	Nature Could Reach Half Protected	#E600AA	#FE01C4	#7BC141	CC-BY 4.0	0	1	0	1	Indigenous - resident	Certain	1		Mangroves adjacent to upland areas	1	0	1
453	453	458	Myanmar Coast mangroves	14	Mangroves	Indomalayan	IN14	2	321	63.7493	1.78948	Nature Could Reach Half Protected	#E600AA	#FE01C4	#7BC141	CC-BY 4.0	0	1	0	1	Indigenous - resident	Certain	1		Mangroves adjacent to upland areas	1	0	1
453	453	458	Myanmar Coast mangroves	14	Mangroves	Indomalayan	IN14	2	321	63.7493	1.78948	Nature Could Reach Half Protected	#E600AA	#FE01C4	#7BC141	CC-BY 4.0	0	1	0	1	Indigenous - resident	Certain	1		Mangroves adjacent to upland areas	1	0	1
788	788	794	Western Java rain forests	1	Tropical & Subtropical Moist Broadleaf Forests	Indomalayan	IN01	3	289	27.8195	3.39415	Nature Could Recover	#36C900	#38A700	#F9A91B	CC-BY 4.0	0	7	0	7	Indigenous - resident	Certain	1			1	1	2
788	788	794	Western Java rain forests	1	Tropical & Subtropical Moist Broadleaf Forests	Indomalayan	IN01	3	289	27.8195	3.39415	Nature Could Recover	#36C900	#38A700	#F9A91B	CC-BY 4.0	0	7	0	7	Indigenous - resident	Certain	1			1	1	2
237	237	241	Eastern Java-Bali rain forests	1	Tropical & Subtropical Moist Broadleaf Forests	Indomalayan	IN01	4	230	40.6346	4.39738	Nature Imperiled	#23DB01	#38A700	#EE1E23	CC-BY 4.0	0	17	0	17	Indigenous - resident	Certain	0			1	1	2
237	237	241	Eastern Java-Bali rain forests	1	Tropical & Subtropical Moist Broadleaf Forests	Indomalayan	IN01	4	230	40.6346	4.39738	Nature Imperiled	#23DB01	#38A700	#EE1E23	CC-BY 4.0	0	17	0	17	Indigenous - resident	Certain	0			1	1	2
237	237	241	Eastern Java-Bali rain forests	1	Tropical & Subtropical Moist Broadleaf Forests	Indomalayan	IN01	4	230	40.6346	4.39738	Nature Imperiled	#23DB01	#38A700	#EE1E23	CC-BY 4.0	0	17	0	17	Indigenous - resident	Certain	0			1	1	2
237	237	241	Eastern Java-Bali rain forests	1	Tropical & Subtropical Moist Broadleaf Forests	Indomalayan	IN01	4	230	40.6346	4.39738	Nature Imperiled	#23DB01	#38A700	#EE1E23	CC-BY 4.0	0	17	0	17	Indigenous - resident	Certain	0			1	1	2
237	237	241	Eastern Java-Bali rain forests	1	Tropical & Subtropical Moist Broadleaf Forests	Indomalayan	IN01	4	230	40.6346	4.39738	Nature Imperiled	#23DB01	#38A700	#EE1E23	CC-BY 4.0	0	17	0	17	Indigenous - resident	Certain	0			1	1	2
237	237	241	Eastern Java-Bali rain forests	1	Tropical & Subtropical Moist Broadleaf Forests	Indomalayan	IN01	4	230	40.6346	4.39738	Nature Imperiled	#23DB01	#38A700	#EE1E23	CC-BY 4.0	0	17	0	17	Indigenous - resident	Certain	0			1	1	2
684	684	689	Southern Vietnam lowland dry forests	2	Tropical & Subtropical Dry Broadleaf Forests	Indomalayan	IN02	3	300	28.6643	2.91591	Nature Could Recover	#8DC138	#CCCD65	#F9A91B	CC-BY 4.0	0	3	0	3	Indigenous - resident	Certain	1			1	1	2
684	684	689	Southern Vietnam lowland dry forests	2	Tropical & Subtropical Dry Broadleaf Forests	Indomalayan	IN02	3	300	28.6643	2.91591	Nature Could Recover	#8DC138	#CCCD65	#F9A91B	CC-BY 4.0	0	3	0	3	Indigenous - resident	Certain	1			1	1	2
684	684	689	Southern Vietnam lowland dry forests	2	Tropical & Subtropical Dry Broadleaf Forests	Indomalayan	IN02	3	300	28.6643	2.91591	Nature Could Recover	#8DC138	#CCCD65	#F9A91B	CC-BY 4.0	0	3	0	3	Indigenous - resident	Certain	1			1	1	2
684	684	689	Southern Vietnam lowland dry forests	2	Tropical & Subtropical Dry Broadleaf Forests	Indomalayan	IN02	3	300	28.6643	2.91591	Nature Could Recover	#8DC138	#CCCD65	#F9A91B	CC-BY 4.0	0	3	0	3	Indigenous - resident	Certain	1			1	1	2
684	684	689	Southern Vietnam lowland dry forests	2	Tropical & Subtropical Dry Broadleaf Forests	Indomalayan	IN02	3	300	28.6643	2.91591	Nature Could Recover	#8DC138	#CCCD65	#F9A91B	CC-BY 4.0	0	3	0	3	Indigenous - resident	Certain	1			1	1	2
329	329	333	Indochina mangroves	14	Mangroves	Indomalayan	IN14	4	319	56.5914	2.21558	Nature Imperiled	#E600AA	#FE01C4	#EE1E23	CC-BY 4.0	0	1	0	1	Indigenous - resident	Certain	1		mangroves	1	1	2
329	329	333	Indochina mangroves	14	Mangroves	Indomalayan	IN14	4	319	56.5914	2.21558	Nature Imperiled	#E600AA	#FE01C4	#EE1E23	CC-BY 4.0	0	1	0	1	Indigenous - resident	Certain	1		mangroves	1	1	2
329	329	333	Indochina mangroves	14	Mangroves	Indomalayan	IN14	4	319	56.5914	2.21558	Nature Imperiled	#E600AA	#FE01C4	#EE1E23	CC-BY 4.0	0	1	0	1	Indigenous - resident	Certain	1		mangroves	1	1	2
329	329	333	Indochina mangroves	14	Mangroves	Indomalayan	IN14	4	319	56.5914	2.21558	Nature Imperiled	#E600AA	#FE01C4	#EE1E23	CC-BY 4.0	0	1	0	1	Indigenous - resident	Certain	1		mangroves	1	1	2
329	329	333	Indochina mangroves	14	Mangroves	Indomalayan	IN14	4	319	56.5914	2.21558	Nature Imperiled	#E600AA	#FE01C4	#EE1E23	CC-BY 4.0	0	1	0	1	Indigenous - resident	Certain	1		mangroves	1	1	2
329	329	333	Indochina mangroves	14	Mangroves	Indomalayan	IN14	4	319	56.5914	2.21558	Nature Imperiled	#E600AA	#FE01C4	#EE1E23	CC-BY 4.0	0	1	0	1	Indigenous - resident	Certain	1		mangroves	1	1	2
329	329	333	Indochina mangroves	14	Mangroves	Indomalayan	IN14	4	319	56.5914	2.21558	Nature Imperiled	#E600AA	#FE01C4	#EE1E23	CC-BY 4.0	0	1	0	1	Indigenous - resident	Certain	1		mangroves	1	1	2
329	329	333	Indochina mangroves	14	Mangroves	Indomalayan	IN14	4	319	56.5914	2.21558	Nature Imperiled	#E600AA	#FE01C4	#EE1E23	CC-BY 4.0	0	1	0	1	Indigenous - resident	Certain	1		mangroves	1	1	2
329	329	333	Indochina mangroves	14	Mangroves	Indomalayan	IN14	4	319	56.5914	2.21558	Nature Imperiled	#E600AA	#FE01C4	#EE1E23	CC-BY 4.0	0	1	0	1	Indigenous - resident	Certain	1		mangroves	1	1	2
329	329	333	Indochina mangroves	14	Mangroves	Indomalayan	IN14	4	319	56.5914	2.21558	Nature Imperiled	#E600AA	#FE01C4	#EE1E23	CC-BY 4.0	0	1	0	1	Indigenous - resident	Certain	1		mangroves	1	1	2
329	329	333	Indochina mangroves	14	Mangroves	Indomalayan	IN14	4	319	56.5914	2.21558	Nature Imperiled	#E600AA	#FE01C4	#EE1E23	CC-BY 4.0	0	1	0	1	Indigenous - resident	Certain	1		mangroves	1	1	2
329	329	333	Indochina mangroves	14	Mangroves	Indomalayan	IN14	4	319	56.5914	2.21558	Nature Imperiled	#E600AA	#FE01C4	#EE1E23	CC-BY 4.0	0	1	0	1	Indigenous - resident	Certain	1		mangroves	1	1	2
329	329	333	Indochina mangroves	14	Mangroves	Indomalayan	IN14	4	319	56.5914	2.21558	Nature Imperiled	#E600AA	#FE01C4	#EE1E23	CC-BY 4.0	0	1	0	1	Indigenous - resident	Certain	1		mangroves	1	1	2
329	329	333	Indochina mangroves	14	Mangroves	Indomalayan	IN14	4	319	56.5914	2.21558	Nature Imperiled	#E600AA	#FE01C4	#EE1E23	CC-BY 4.0	0	1	0	1	Indigenous - resident	Certain	1		mangroves	1	1	2
329	329	333	Indochina mangroves	14	Mangroves	Indomalayan	IN14	4	319	56.5914	2.21558	Nature Imperiled	#E600AA	#FE01C4	#EE1E23	CC-BY 4.0	0	1	0	1	Indigenous - resident	Certain	1		mangroves	1	1	2
329	329	333	Indochina mangroves	14	Mangroves	Indomalayan	IN14	4	319	56.5914	2.21558	Nature Imperiled	#E600AA	#FE01C4	#EE1E23	CC-BY 4.0	0	1	0	1	Indigenous - resident	Certain	1		mangroves	1	1	2
329	329	333	Indochina mangroves	14	Mangroves	Indomalayan	IN14	4	319	56.5914	2.21558	Nature Imperiled	#E600AA	#FE01C4	#EE1E23	CC-BY 4.0	0	1	0	1	Indigenous - resident	Certain	1		mangroves	1	1	2
329	329	333	Indochina mangroves	14	Mangroves	Indomalayan	IN14	4	319	56.5914	2.21558	Nature Imperiled	#E600AA	#FE01C4	#EE1E23	CC-BY 4.0	0	1	0	1	Indigenous - resident	Certain	1		mangroves	1	1	2
329	329	333	Indochina mangroves	14	Mangroves	Indomalayan	IN14	4	319	56.5914	2.21558	Nature Imperiled	#E600AA	#FE01C4	#EE1E23	CC-BY 4.0	0	1	0	1	Indigenous - resident	Certain	1		mangroves	1	1	2
329	329	333	Indochina mangroves	14	Mangroves	Indomalayan	IN14	4	319	56.5914	2.21558	Nature Imperiled	#E600AA	#FE01C4	#EE1E23	CC-BY 4.0	0	1	0	1	Indigenous - resident	Certain	1		mangroves	1	1	2
329	329	333	Indochina mangroves	14	Mangroves	Indomalayan	IN14	4	319	56.5914	2.21558	Nature Imperiled	#E600AA	#FE01C4	#EE1E23	CC-BY 4.0	0	1	0	1	Indigenous - resident	Certain	1		mangroves	1	1	2
329	329	333	Indochina mangroves	14	Mangroves	Indomalayan	IN14	4	319	56.5914	2.21558	Nature Imperiled	#E600AA	#FE01C4	#EE1E23	CC-BY 4.0	0	1	0	1	Indigenous - resident	Certain	1		mangroves	1	1	2
329	329	333	Indochina mangroves	14	Mangroves	Indomalayan	IN14	4	319	56.5914	2.21558	Nature Imperiled	#E600AA	#FE01C4	#EE1E23	CC-BY 4.0	0	1	0	1	Indigenous - resident	Certain	1		mangroves	1	1	2
329	329	333	Indochina mangroves	14	Mangroves	Indomalayan	IN14	4	319	56.5914	2.21558	Nature Imperiled	#E600AA	#FE01C4	#EE1E23	CC-BY 4.0	0	1	0	1	Indigenous - resident	Certain	1		mangroves	1	1	2
329	329	333	Indochina mangroves	14	Mangroves	Indomalayan	IN14	4	319	56.5914	2.21558	Nature Imperiled	#E600AA	#FE01C4	#EE1E23	CC-BY 4.0	0	1	0	1	Indigenous - resident	Certain	1		mangroves	1	1	2
329	329	333	Indochina mangroves	14	Mangroves	Indomalayan	IN14	4	319	56.5914	2.21558	Nature Imperiled	#E600AA	#FE01C4	#EE1E23	CC-BY 4.0	0	1	0	1	Indigenous - resident	Certain	1		mangroves	1	1	2
329	329	333	Indochina mangroves	14	Mangroves	Indomalayan	IN14	4	319	56.5914	2.21558	Nature Imperiled	#E600AA	#FE01C4	#EE1E23	CC-BY 4.0	0	1	0	1	Indigenous - resident	Certain	1		mangroves	1	1	2
329	329	333	Indochina mangroves	14	Mangroves	Indomalayan	IN14	4	319	56.5914	2.21558	Nature Imperiled	#E600AA	#FE01C4	#EE1E23	CC-BY 4.0	0	1	0	1	Indigenous - resident	Certain	1		mangroves	1	1	2
329	329	333	Indochina mangroves	14	Mangroves	Indomalayan	IN14	4	319	56.5914	2.21558	Nature Imperiled	#E600AA	#FE01C4	#EE1E23	CC-BY 4.0	0	1	0	1	Indigenous - resident	Certain	1		mangroves	1	1	2
329	329	333	Indochina mangroves	14	Mangroves	Indomalayan	IN14	4	319	56.5914	2.21558	Nature Imperiled	#E600AA	#FE01C4	#EE1E23	CC-BY 4.0	0	1	0	1	Indigenous - resident	Certain	1		mangroves	1	1	2
329	329	333	Indochina mangroves	14	Mangroves	Indomalayan	IN14	4	319	56.5914	2.21558	Nature Imperiled	#E600AA	#FE01C4	#EE1E23	CC-BY 4.0	0	1	0	1	Indigenous - resident	Certain	1		mangroves	1	1	2
329	329	333	Indochina mangroves	14	Mangroves	Indomalayan	IN14	4	319	56.5914	2.21558	Nature Imperiled	#E600AA	#FE01C4	#EE1E23	CC-BY 4.0	0	1	0	1	Indigenous - resident	Certain	1		mangroves	1	1	2
329	329	333	Indochina mangroves	14	Mangroves	Indomalayan	IN14	4	319	56.5914	2.21558	Nature Imperiled	#E600AA	#FE01C4	#EE1E23	CC-BY 4.0	0	1	0	1	Indigenous - resident	Certain	1		mangroves	1	1	2
329	329	333	Indochina mangroves	14	Mangroves	Indomalayan	IN14	4	319	56.5914	2.21558	Nature Imperiled	#E600AA	#FE01C4	#EE1E23	CC-BY 4.0	0	1	0	1	Indigenous - resident	Certain	1		mangroves	1	1	2
329	329	333	Indochina mangroves	14	Mangroves	Indomalayan	IN14	4	319	56.5914	2.21558	Nature Imperiled	#E600AA	#FE01C4	#EE1E23	CC-BY 4.0	0	1	0	1	Indigenous - resident	Certain	1		mangroves	1	1	2
329	329	333	Indochina mangroves	14	Mangroves	Indomalayan	IN14	4	319	56.5914	2.21558	Nature Imperiled	#E600AA	#FE01C4	#EE1E23	CC-BY 4.0	0	1	0	1	Indigenous - resident	Certain	1		mangroves	1	1	2
329	329	333	Indochina mangroves	14	Mangroves	Indomalayan	IN14	4	319	56.5914	2.21558	Nature Imperiled	#E600AA	#FE01C4	#EE1E23	CC-BY 4.0	0	1	0	1	Indigenous - resident	Certain	1		mangroves	1	1	2
329	329	333	Indochina mangroves	14	Mangroves	Indomalayan	IN14	4	319	56.5914	2.21558	Nature Imperiled	#E600AA	#FE01C4	#EE1E23	CC-BY 4.0	0	1	0	1	Indigenous - resident	Certain	1		mangroves	1	1	2
329	329	333	Indochina mangroves	14	Mangroves	Indomalayan	IN14	4	319	56.5914	2.21558	Nature Imperiled	#E600AA	#FE01C4	#EE1E23	CC-BY 4.0	0	1	0	1	Indigenous - resident	Certain	1		mangroves	1	1	2
329	329	333	Indochina mangroves	14	Mangroves	Indomalayan	IN14	4	319	56.5914	2.21558	Nature Imperiled	#E600AA	#FE01C4	#EE1E23	CC-BY 4.0	0	1	0	1	Indigenous - resident	Certain	1		mangroves	1	1	2
329	329	333	Indochina mangroves	14	Mangroves	Indomalayan	IN14	4	319	56.5914	2.21558	Nature Imperiled	#E600AA	#FE01C4	#EE1E23	CC-BY 4.0	0	1	0	1	Indigenous - resident	Certain	1		mangroves	1	1	2
329	329	333	Indochina mangroves	14	Mangroves	Indomalayan	IN14	4	319	56.5914	2.21558	Nature Imperiled	#E600AA	#FE01C4	#EE1E23	CC-BY 4.0	0	1	0	1	Indigenous - resident	Certain	1		mangroves	1	1	2
329	329	333	Indochina mangroves	14	Mangroves	Indomalayan	IN14	4	319	56.5914	2.21558	Nature Imperiled	#E600AA	#FE01C4	#EE1E23	CC-BY 4.0	0	1	0	1	Indigenous - resident	Certain	1		mangroves	1	1	2
101	101	103	Cardamom Mountains rain forests	1	Tropical & Subtropical Moist Broadleaf Forests	Indomalayan	IN01	2	223	24.0225	3.66068	Nature Could Reach Half Protected	#004600	#38A700	#7BC141	CC-BY 4.0	0	0	2	2	Indigenous - resident	Certain	1			1	1	2
101	101	103	Cardamom Mountains rain forests	1	Tropical & Subtropical Moist Broadleaf Forests	Indomalayan	IN01	2	223	24.0225	3.66068	Nature Could Reach Half Protected	#004600	#38A700	#7BC141	CC-BY 4.0	0	0	2	2	Indigenous - resident	Certain	1			1	1	2
101	101	103	Cardamom Mountains rain forests	1	Tropical & Subtropical Moist Broadleaf Forests	Indomalayan	IN01	2	223	24.0225	3.66068	Nature Could Reach Half Protected	#004600	#38A700	#7BC141	CC-BY 4.0	0	0	2	2	Indigenous - resident	Certain	1			1	1	2
101	101	103	Cardamom Mountains rain forests	1	Tropical & Subtropical Moist Broadleaf Forests	Indomalayan	IN01	2	223	24.0225	3.66068	Nature Could Reach Half Protected	#004600	#38A700	#7BC141	CC-BY 4.0	0	0	2	2	Indigenous - resident	Certain	1			1	1	2
519	519	524	Northern Vietnam lowland rain forests	1	Tropical & Subtropical Moist Broadleaf Forests	Indomalayan	IN01	3	260	21.985	1.92541	Nature Could Recover	#035701	#38A700	#F9A91B	CC-BY 4.0	0	4	1	5	Indigenous - resident	Certain	1			1	1	2
519	519	524	Northern Vietnam lowland rain forests	1	Tropical & Subtropical Moist Broadleaf Forests	Indomalayan	IN01	3	260	21.985	1.92541	Nature Could Recover	#035701	#38A700	#F9A91B	CC-BY 4.0	0	4	1	5	Indigenous - resident	Certain	1			1	1	2
519	519	524	Northern Vietnam lowland rain forests	1	Tropical & Subtropical Moist Broadleaf Forests	Indomalayan	IN01	3	260	21.985	1.92541	Nature Could Recover	#035701	#38A700	#F9A91B	CC-BY 4.0	0	4	1	5	Indigenous - resident	Certain	1			1	1	2
519	519	524	Northern Vietnam lowland rain forests	1	Tropical & Subtropical Moist Broadleaf Forests	Indomalayan	IN01	3	260	21.985	1.92541	Nature Could Recover	#035701	#38A700	#F9A91B	CC-BY 4.0	0	4	1	5	Indigenous - resident	Certain	1			1	1	2
350	350	354	Jian Nan subtropical evergreen forests	1	Tropical & Subtropical Moist Broadleaf Forests	Indomalayan	IN01	3	236	104.091	59.745	Nature Could Recover	#23DB01	#38A700	#F9A91B	CC-BY 4.0	0	731	0	731	Indigenous - resident	Certain	0			1	1	2
350	350	354	Jian Nan subtropical evergreen forests	1	Tropical & Subtropical Moist Broadleaf Forests	Indomalayan	IN01	3	236	104.091	59.745	Nature Could Recover	#23DB01	#38A700	#F9A91B	CC-BY 4.0	0	731	0	731	Indigenous - resident	Certain	0			1	1	2
350	350	354	Jian Nan subtropical evergreen forests	1	Tropical & Subtropical Moist Broadleaf Forests	Indomalayan	IN01	3	236	104.091	59.745	Nature Could Recover	#23DB01	#38A700	#F9A91B	CC-BY 4.0	0	731	0	731	Indigenous - resident	Certain	0			1	1	2
154	154	156	Changjiang Plain evergreen forests	4	Temperate Broadleaf & Mixed Forests	Palearctic	PA04	4	657	64.3428	41.2035	Nature Imperiled	#55A649	#00734C	#EE1E23	CC-BY 4.0	0	575	0	575	Indigenous - resident	Certain	0			1	1	3
154	154	156	Changjiang Plain evergreen forests	4	Temperate Broadleaf & Mixed Forests	Palearctic	PA04	4	657	64.3428	41.2035	Nature Imperiled	#55A649	#00734C	#EE1E23	CC-BY 4.0	0	575	0	575	Indigenous - resident	Certain	0			1	1	3
154	154	156	Changjiang Plain evergreen forests	4	Temperate Broadleaf & Mixed Forests	Palearctic	PA04	4	657	64.3428	41.2035	Nature Imperiled	#55A649	#00734C	#EE1E23	CC-BY 4.0	0	575	0	575	Indigenous - resident	Certain	0			1	1	3
785	785	791	Western Himalayan broadleaf forests	4	Temperate Broadleaf & Mixed Forests	Indomalayan	IN04	3	308	65.6045	5.34955	Nature Could Recover	#57E843	#00734C	#F9A91B	CC-BY 4.0	0	1	0	1	Indigenous - range	Uncertain	1			1	0	1
