# Supplementary material for: Range-wide trends in tiger conservation landscapes, 2001 - 2020
Source: Frontiers journal article supplement (doi:10.3389/fcosc.2023.1191280), 2023-12-08
Supplement: Table_4.XLSX [file Table_4.XLSX]

## Sheet: Sheet1
Table S4. Land cover classes, vegetation height, and elevation thresholds to map structural habitat for the tiger
Elevation tresholds (m)				Veg height (m)	Land use / land cover class
Zone 1	Zone 2	Zone 3	Zone 4
<4750	<4750	<2150	<2150	0	Tree cover, needleleaved, evergreen, open (15-40%)
<4750	<4750	<2150	<2150	0	Tree cover, needleleaved, evergreen, closed to open (>15%)
<4750	<4750	<2150	<2150	0	Tree cover, needleleaved, evergreen, closed (>40%)
<4750	<4750	<2150	<2150	0	Tree cover, needleleaved, deciduous, open (15-40%)
<4750	<4750	<2150	<2150	0	Tree cover, needleleaved, deciduous, closed to open (>15%)
<4750	<4750	<2150	<2150	0	Tree cover, needleleaved, deciduous, closed (>40%)
<4750	<4750	<2150	<2150	0	Tree cover, mixed leaf type (broadleaved and needleleaved)
<4750	<4750	<2150	<2150	0	Tree cover, flooded, saline water
<4750	<4750	<2150	<2150	0	Tree cover, flooded, fresh or brakish water
<4750	<4750	<2150	<2150	0	Tree cover, broadleaved, evergreen, closed to open (>15%)
<4750	<4750	<2150	<2150	0	Tree cover, broadleaved, deciduous, open (15-40%)
<4750	<4750	<2150	<2150	0	Tree cover, broadleaved, deciduous, closed to open (>15%)
<4750	<4750	<2150	<2150	0	Tree cover, broadleaved, deciduous, closed (>40%)
<4750	<4750	<2150	<2150	0	Tree or shrub cover (Mosaic tree and shrub > 50%)
<4750	<4750	<2150	<2150	> 5 m	Mosaic tree and shrub (>50%) / herbaceous cover (<50%)
<4750	<4750	<2150	<2150	> 5 m	Mosaic natural vegetation (tree, shrub, herbaceous cover) (>50%) / cropland (<50%)
<4750	<4750	<2150	<2150	0	Shrubland
<4750	<4750	<2150	<2150	0	Evergreen shrubland
<4750	<4750	<2150	<2150	0	Deciduous shrubland
0	0	0	0	0	Shrub or herbaceous cover, flooded, fresh/saline/brakish water
0	0	0	0	0	Mosaic herbaceous cover (>50%) / tree and shrub (<50%)
0	0	0	0	0	Mosaic cropland (>50%) / natural vegetation (tree, shrub, herbaceous cover) (<50%)
0	0	0	0	0	Lichens and mosses
0	0	0	0	0	Herbaceous cover
0	0	0	0	0	Grassland
0	0	0	0	0	Sparse vegetation (tree, shrub, herbaceous cover) (<15%)
0	0	0	0	0	Sparse tree (<15%)
0	0	0	0	0	Sparse shrub (<15%)
0	0	0	0	0	Sparse herbaceous cover (<15%)
0	0	0	0	0	Unconsolidated bare areas
0	0	0	0	0	Urban areas
0	0	0	0	0	Cropland, rainfed
0	0	0	0	0	Cropland, irrigated or postâ€flooding
0	0	0	0	0	Consolidated bare areas
0	0	0	0	0	Bare areas
0	0	0	0	0	Permanent snow and ice
0	0	0	0	0	Water bodies
0	0	0	0	0	No Data
Note: 0 elevation thresholds mean these classes are excluded from the analysis.
